# Supplementary material
Source: publisher figshare collection journal article supplement (https://acs.figshare.com/ndownloader/files/15147692)

# **A Synthesis of Multifunctionalized Indoles from [3+2] Annulation of 2-Bromocyclopropenes with Anilines**

Zhu Cao,<sup>¶†</sup> Jian-Bo Zhu,<sup>¶‡</sup> Lijia Wang,<sup>§\*</sup> Saihu Liao<sup>†\*</sup> and Yong Tang<sup>‡</sup>

<sup>†</sup> College of Chemistry, Fuzhou University, 2 Xueyuan Road, Fuzhou, Fujian 350108, China

<sup>‡</sup> State Key Laboratory of Organometallic Chemistry, Shanghai Institute of Organic Chemistry, Chinese Academy of Sciences, University of Chinese Academy of Sciences, 345 Lingling Road, Shanghai, 200032, China

<sup>§</sup> School of Chemistry and Molecular Engineering, East China Normal University, 500 Dongchuan Road, Shanghai, 200241, China

ljwang@chem.ecnu.edu.cn; shliao@fzu.edu.cn

# Supporting Information

## Contents

|                                                         |     |
|---------------------------------------------------------|-----|
| 1. General Information.....                             | S3  |
| 2. Synthesis of Cyclopropenes.....                      | S4  |
| 3. General Procedure for the Synthesis of Indoles ..... | S8  |
| 4. Proposed Mechanism.....                              | S21 |
| 5. Chemical Transformation of the Products .....        | S22 |
| 6. X-ray Crystallographic Data.....                     | S25 |
| 7. References.....                                      | S27 |
| 8. Copies of NMR Spectra of Products .....              | S28 |

## 1. General Information

All reactions were carried out under Ar unless otherwise noted. All compounds and solvents were purified according to standard methods unless otherwise noted.  $^1\text{H}$  NMR spectra were recorded on a Varian Mercury 400 MHz or Agilent Mercury 400 MHz spectrometer ( $^1\text{H}$ : 400 MHz and  $^{13}\text{C}$ : 100 MHz) in chloroform- $d$  or DMSO- $d_6$ .  $^1\text{H}$  and  $^{13}\text{C}$  NMR spectra were internally referenced to the proton ( $^1\text{H}$ ) of the internal TMS signal at 0.00 ppm or the solvent residue of DMSO at 2.54 ppm and the residual carbon nuclei ( $^{13}\text{C}$ ) of the solvent at 77.0 or 40.0 ppm, respectively. Data for  $^1\text{H}$  NMR were recorded as follows: chemical shift ( $\delta$ , ppm), multiplicity (s = singlet, d = doublet, t = triplet, m = multiplet or unresolved, coupling constant(s) in Hz, integration). IR spectra were recorded on a Bruker–Tensor 27; frequencies are given in reciprocal centimeters ( $\text{cm}^{-1}$ ) and only selected absorbance is reported. High resolution mass spectra were recorded on Agilent Technologies 6224 TOF LC/MS (ESI) or Thermo Scientific Q Exactive HF Orbitrap-FTMS (ESI) mass spectrometers. Substrates are commercially available or were prepared according to the literatures<sup>1-4</sup>.

## 2. Synthesis of Cyclopropenes

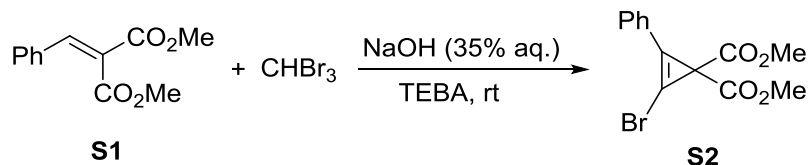

A mixture of **S1** (20.2 g, 91.8 mmol),  $\text{CHBr}_3$  (80.2 mL, 918.0 mmol), 35% aq.  $\text{NaOH}$  (185.0 mL) and benzyltriethylammonium chloride (4.20 g, 18.4 mmol) was stirred at room temperature. After the completion of the reaction (monitored by  $^1\text{H}$  NMR, in 4.0 hours), water was added and the mixture was extracted with DCM, and the organic layer was washed with brine and dried over  $\text{Na}_2\text{SO}_4$ . After concentration in vacuo, the residue was purified by column chromatography on silica gel to provide the **S2** (24.3 g, 85% yield) as white solid.  $^1\text{H}$  NMR (400 MHz,  $\text{CDCl}_3$ , TMS)  $\delta$  7.62-7.59 (m, 2H), 7.46-7.44 (m, 3H), 3.77 (s, 6H);  $^{13}\text{C}$  NMR (100 MHz,  $\text{CDCl}_3$ )  $\delta$  169.2, 130.5, 129.5, 128.9, 122.9, 112.5, 84.8, 52.6, 39.0; IR  $\nu/\text{cm}^{-1}$  2957, 1738, 1428, 1057, 758; HRMS-ESI ( $m/z$ ): calcd for  $\text{C}_{13}\text{H}_{12}\text{BrO}_4^+$  ( $[\text{M}+\text{H}]^+$ ): 310.9913; Found: 310.9919.

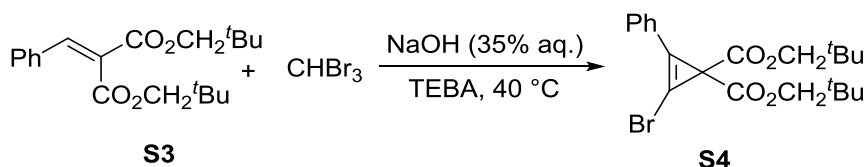

A mixture of **S3** (10.0 g, 30.0 mmol),  $\text{CHBr}_3$  (26.2 mL, 300.0 mmol), 35% aq.  $\text{NaOH}$  (45.0 mL) and benzyltriethylammonium chloride (1.37 g, 6.0 mmol) was stirred at 40 °C. After the completion of the reaction (monitored by TLC, in 4.0 hours), water was added and the mixture was extracted with DCM, and the organic layer was washed with brine and dried over  $\text{Na}_2\text{SO}_4$ . After concentration in vacuo, the residue was purified by column chromatography on silica gel to provide the **S4** (10.3 g, 81% yield) as brown oil.  $^1\text{H}$  NMR (400 MHz,  $\text{CDCl}_3$ , TMS)  $\delta$  7.63-7.61 (m, 2H), 7.45-7.42 (m, 3H), 3.87 (ABd,  $J_{AB} = 10.4$  Hz, 2H), 3.84 (ABd,  $J_{BA} = 10.8$  Hz, 2H), 0.89 (s, 18H);  $^{13}\text{C}$  NMR (100 MHz,  $\text{CDCl}_3$ )  $\delta$  168.8, 130.5, 129.5, 128.9, 123.1, 112.8, 85.1, 74.5, 39.5, 31.4, 26.3; IR  $\nu/\text{cm}^{-1}$  2958, 1731, 1241, 1051, 759; HRMS-ESI ( $m/z$ ): calcd for

$C_{21}H_{28}BrO_4^+$  ( $[M+H]^+$ ): 423.1165; Found: 423.1174.

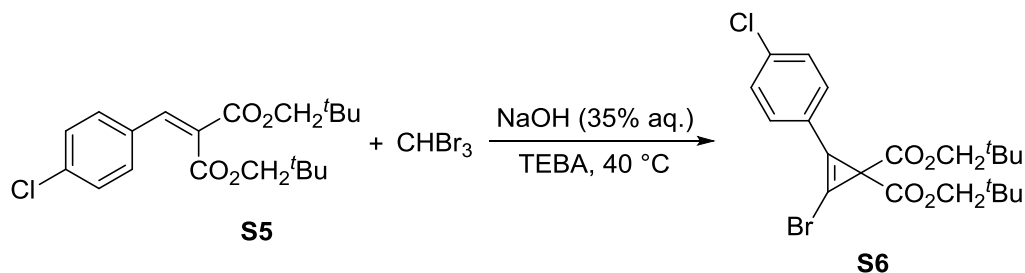

A mixture of **S5** (2.0 g, 5.5 mmol),  $CHBr_3$  (4.8 mL, 55.0 mmol), 35% aq. NaOH (12.0 mL) and benzyltriethylammonium chloride (0.25 g, 1.1 mmol) was stirred at 40 °C. After the completion of the reaction (monitored by TLC, in 3.5 hours), water was added and the mixture was extracted with DCM, and the organic layer was washed with brine and dried over  $Na_2SO_4$ . After concentration in vacuo, the residue was purified by column chromatography on silica gel to provide the **S6** (2.1 g, 83% yield) as white solid.  $^1H$  NMR (400 MHz,  $CDCl_3$ , TMS)  $\delta$  7.57-7.54 (m, 2H), 7.44-7.41 (m, 2H), 3.88 (ABd,  $J_{AB}$  = 10.4 Hz, 2H), 3.84 (ABd,  $J_{BA}$  = 10.4 Hz, 2H), 0.89 (s, 18H);  $^{13}C$  NMR (100 MHz,  $CDCl_3$ )  $\delta$  168.5, 136.6, 130.6, 129.3, 121.7, 112.0, 86.0, 74.6, 39.4, 31.4, 26.2; IR  $\nu$ /  $cm^{-1}$  2956, 1730, 1367, 1168, 743; HRMS-ESI ( $m/z$ ): calcd for  $C_{21}H_{27}BrClO_4^+$  ( $[M+H]^+$ ): 457.0776; Found: 457.0779.

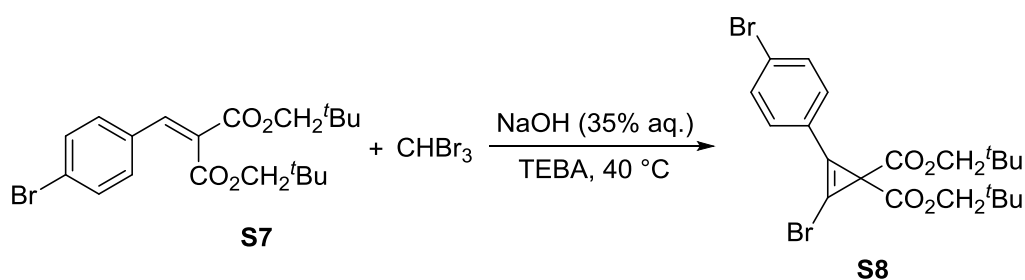

A mixture of **S7** (2.5 g, 6.1 mmol),  $CHBr_3$  (5.3 mL, 61.0 mmol), 35% aq. NaOH (15.0 mL) and benzyltriethylammonium chloride (0.28 g, 1.2 mmol) was stirred at 40 °C. After the completion of the reaction (monitored by TLC, in 4.0 hours), water was added and the mixture was extracted with DCM, and the organic layer was washed with brine and dried over  $Na_2SO_4$ . After concentration in vacuo, the residue was purified by column chromatography on silica gel to provide the **S8** (2.3 g, 76% yield)

as white solid.  $^1\text{H}$  NMR (400 MHz,  $\text{CDCl}_3$ , TMS)  $\delta$  7.60-7.57 (m, 2H), 7.50-7.47 (m, 2H), 3.88 (ABd,  $J_{AB} = 10.8$  Hz, 2H), 3.84 (ABd,  $J_{BA} = 10.4$  Hz, 2H), 0.89 (s, 18H);  $^{13}\text{C}$  NMR (100 MHz,  $\text{CDCl}_3$ )  $\delta$  168.5, 132.2, 130.8, 125.0, 122.1, 112.1, 86.2, 74.6, 39.4, 31.4, 26.3; IR  $\nu/\text{cm}^{-1}$  2955, 1729, 1367, 1168, 737; HRMS-ESI ( $m/z$ ): calcd for  $\text{C}_{21}\text{H}_{27}\text{Br}_2\text{O}_4^+$  ( $[\text{M}+\text{H}]^+$ ): 501.0271; Found: 501.0272.

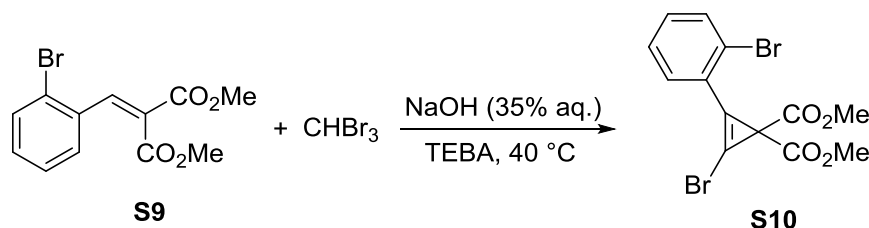

A mixture of **S9** (4.4 g, 14.8 mmol),  $\text{CHBr}_3$  (13.0 mL, 148.0 mmol), 35% aq. NaOH (34.0 mL) and benzyltriethylammonium chloride (0.68 g, 3.0 mmol) was stirred at 40 °C. After the completion of the reaction (monitored by TLC, in 1.5 hours), water was added and the mixture was extracted with DCM, and the organic layer was washed with brine and dried over  $\text{Na}_2\text{SO}_4$ . After concentration in vacuo, the residue was purified by column chromatography on silica gel to provide the **S10** (3.8 g, 65% yield) as white solid.  $^1\text{H}$  NMR (400 MHz,  $\text{CDCl}_3$ , TMS)  $\delta$  7.65 (d,  $J = 8.0$  Hz, 1H), 7.50 (d,  $J = 7.2$  Hz, 1H), 7.37 (t,  $J = 7.4$  Hz, 1H), 7.30 (t,  $J = 7.4$  Hz, 1H), 3.77 (s, 6H);  $^{13}\text{C}$  NMR (100 MHz,  $\text{CDCl}_3$ )  $\delta$  169.0, 133.4, 131.9, 131.7, 127.5, 124.8, 124.4, 111.2, 88.9, 52.6, 38.6; IR  $\nu/\text{cm}^{-1}$  2955, 1720, 1250, 1063, 784, 736; HRMS-ESI ( $m/z$ ): calcd for  $\text{C}_{13}\text{H}_{11}\text{Br}_2\text{O}_4^+$  ( $[\text{M}+\text{H}]^+$ ): 388.9019; Found: 388.9025.

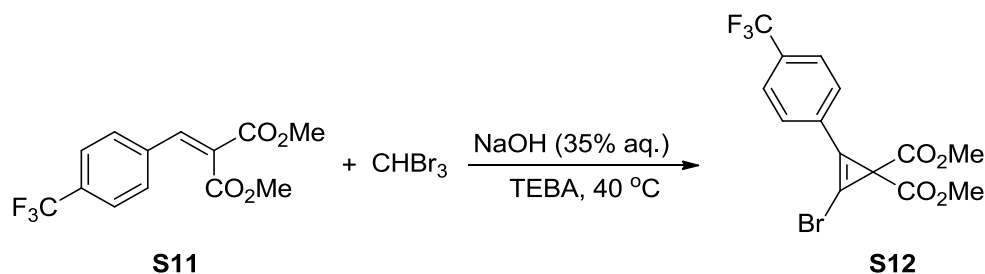

A mixture of **S11** (2.0 g, 7.0 mmol),  $\text{CHBr}_3$  (6.1 mL, 70.0 mmol), 35% aq. NaOH (16.0 mL) and benzyltriethylammonium chloride (0.32 g, 1.4 mmol) was stirred at 40 °C. After the completion of the reaction (monitored by  $^1\text{H}$  NMR, in 1.0 hours), water

was added and the mixture was extracted with DCM, and the organic layer was washed with brine and dried over Na<sub>2</sub>SO<sub>4</sub>. After concentration in vacuo, the residue was purified by column chromatography on silica gel to provide the **S12** (1.5 g, 55% yield) as white solid. <sup>1</sup>H NMR (400 MHz, CDCl<sub>3</sub>, TMS) δ 7.74-7.69 (m, 4H), 3.79 (s, 6H); <sup>19</sup>F NMR (376 MHz, CDCl<sub>3</sub>) δ -63.1 (s, 3F); <sup>13</sup>C NMR (100 MHz, CDCl<sub>3</sub>) δ 168.7, 131.9 (q, *J*<sub>C-F</sub> = 32.6 Hz), 129.6, 126.4 (d, *J*<sub>C-F</sub> = 1.2 Hz), 125.8 (q, *J*<sub>C-F</sub> = 3.7 Hz), 124.9, 123.5 (q, *J*<sub>C-F</sub> = 270.7 Hz), 111.7, 88.2, 52.6, 39.1; IR ν/ cm<sup>-1</sup> 2960, 1730, 1438, 1319, 1246, 1053, 837, 747; HRMS-ESI (*m/z*): calcd for C<sub>14</sub>H<sub>10</sub>BrF<sub>3</sub>NaO<sub>4</sub><sup>+</sup> ([M+Na]<sup>+</sup>): 400.9607; Found: 400.9605.

### 3. General Procedure for the Synthesis of Indoles

**For 3a-3r and 5a-5h.** A mixture of  $\text{Ni}(\text{ClO}_4)_2 \cdot 6\text{H}_2\text{O}$  (22.0 mg, 0.06 mmol) and the **L5** (5.2 mg, 0.036 mmol) in 1,2-dichloroethane (2.0 mL), with activated 4Å MS (500.0 mg) was stirred at room temperature for 4.0 h under nitrogen. Then, the cyclopropene **2** (0.3 mmol), the aromatic amine **1** or **4** (0.6 mmol) and 1,2-dichloroethane (1.0 mL) were added to the mixture of catalyst successively. The resulting suspension was allowed to stir at 80 °C. Upon disappearance of **2** as confirmed by thin-layer chromatography, the reaction was filtered through a glass funnel with a thin layer (20 mm) of silica gel (100-200 mesh) with  $\text{CH}_2\text{Cl}_2$  and EtOAc. The filtrate was concentrated under reduced pressure, and the residue was purified by flash chromatography (EtOAc/petroleum) to afford the product **3** or **5**.

**For 5i.** A mixture of  $\text{Ni}(\text{ClO}_4)_2 \cdot 6\text{H}_2\text{O}$  (11.0 mg, 0.03 mmol) and the **L4** (8.1 mg, 0.036 mmol) in 1,2-dichloroethane (1.0 mL), with activated 4Å MS (500.0 mg) was stirred at room temperature for 5.0 h under nitrogen. Then, the cyclopropene **2b** (152.0 mg, 0.36 mmol), the aromatic amine **4i** (48.4 mg, 0.3 mmol) and 1,2-dichloroethane (2.0 mL) were added to the mixture of catalyst successively. The resulting suspension was allowed to stir at 80 °C. Upon disappearance of **4i** as confirmed by thin-layer chromatography, the reaction was filtered through a glass funnel with a thin layer (20 mm) of silica gel (100-200 mesh) with  $\text{CH}_2\text{Cl}_2$  and EtOAc. The filtrate was concentrated under reduced pressure, and the residue was purified by flash chromatography (EtOAc/petroleum) to afford the product **5i**.

**For 3s.** A mixture of  $\text{Ni}(\text{ClO}_4)_2 \cdot 6\text{H}_2\text{O}$  (0.29 g, 0.8 mmol) and the **L4** (0.22 g, 0.96 mmol) in 1,2-dichloroethane (20.0 mL), with activated 4Å MS (13.0 g) was stirred at room temperature for 9.0 h under nitrogen. Then, the cyclopropene **2b** (4.05 g, 9.6 mmol), the aromatic amine **1s** (0.86 g, 8.0 mmol) and 1,2-dichloroethane (20.0 mL) were added to the mixture of catalyst successively. The resulting suspension was allowed to stir at 80 °C. Upon disappearance of **1s** as confirmed by thin-layer chromatography, the reaction was filtered through a glass funnel with a thin layer (20 mm) of silica gel (100-200 mesh) with  $\text{CH}_2\text{Cl}_2$  and EtOAc. The filtrate was



concentrated under reduced pressure, and the residue was purified by flash chromatography (EtOAc/petroleum) to afford the product **3s**.

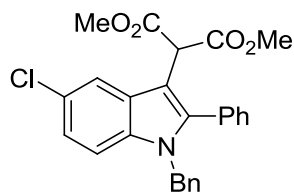

dimethyl 2-(1-benzyl-5-chloro-2-phenyl-1*H*-indol-3-yl)malonate

**3a**

**3a**, white solid, 94 mg, 70% yield;  $^1\text{H}$  NMR (400 MHz,  $\text{CDCl}_3$ , TMS)  $\delta$  7.78 (s, 1H), 7.44-7.40 (m, 3H), 7.36-7.33 (m, 2H), 7.26-7.20 (m, 3H), 7.12-7.07 (m, 2H), 6.90 (d,  $J = 6.4$  Hz, 2H), 5.17 (s, 2H), 4.75 (s, 1H), 3.73 (s, 6H);  $^{13}\text{C}$  NMR (100 MHz,  $\text{CDCl}_3$ )  $\delta$  168.9, 141.7, 137.3, 135.2, 130.7, 129.9, 129.2, 128.7, 127.6, 127.3, 126.1, 126.0, 122.7, 120.4, 111.4, 105.1, 52.7, 49.6, 47.9; IR  $\nu/\text{cm}^{-1}$  2950, 1727, 1357, 1130, 730; HRMS-ESI ( $m/z$ ): calcd for  $\text{C}_{26}\text{H}_{23}\text{ClNO}_4^+$  ( $[\text{M}+\text{H}]^+$ ): 448.1310; Found: 448.1309.

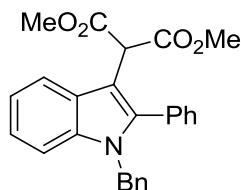

dimethyl 2-(1-benzyl-2-phenyl-1*H*-indol-3-yl)malonate

**3b**

**3b**, white solid, 81 mg, 65% yield;  $^1\text{H}$  NMR (400 MHz,  $\text{CDCl}_3$ , TMS)  $\delta$  7.82-7.79 (m, 1H), 7.42-7.40 (m, 3H), 7.37-7.35 (m, 2H), 7.24-7.15 (m, 6H), 6.94 (d,  $J = 6.8$  Hz, 2H), 5.19 (s, 2H), 4.81 (s, 1H), 3.71 (s, 6H);  $^{13}\text{C}$  NMR (100 MHz,  $\text{CDCl}_3$ )  $\delta$  169.2, 140.3, 137.7, 136.7, 130.8, 130.3, 128.9, 128.6, 128.5, 127.1, 126.6, 126.0, 122.3, 120.8, 120.3, 110.4, 105.4, 52.6, 49.8, 47.7; IR  $\nu/\text{cm}^{-1}$  2949, 1730, 1364, 1145, 725; HRMS-ESI ( $m/z$ ): calcd for  $\text{C}_{26}\text{H}_{24}\text{NO}_4^+$  ( $[\text{M}+\text{H}]^+$ ): 414.1700; Found: 414.1704.

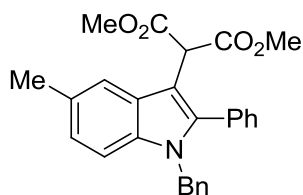

dimethyl 2-(1-benzyl-5-methyl-2-phenyl-1*H*-indol-3-yl)malonate

**3c**

**3c**, white solid, 84 mg, 66% yield;  $^1\text{H}$  NMR (400 MHz,  $\text{CDCl}_3$ , TMS)  $\delta$  7.57 (s, 1H), 7.40-7.34 (m, 5H), 7.22-7.15 (m, 3H), 7.07-6.97 (m, 2H), 6.92 (d,  $J$  = 6.8 Hz, 2H), 5.16 (s, 2H), 4.79 (s, 1H), 3.70 (s, 6H), 2.46 (s, 3H);  $^{13}\text{C}$  NMR (100 MHz,  $\text{CDCl}_3$ )  $\delta$  169.2, 140.4, 137.9, 135.1, 130.7, 130.4, 129.6, 128.8, 128.52, 128.48, 127.0, 126.8, 126.0, 123.9, 120.3, 110.0, 104.8, 52.6, 49.7, 47.7, 21.6; IR  $\nu/\text{cm}^{-1}$  2950, 1731, 1361, 1174, 729; HRMS-ESI ( $m/z$ ): calcd for  $\text{C}_{27}\text{H}_{26}\text{NO}_4^+$  ( $[\text{M}+\text{H}]^+$ ): 428.1856; Found: 428.1862.

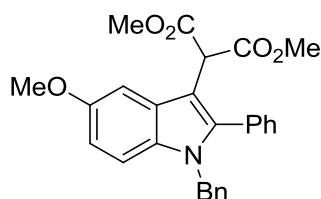

dimethyl 2-(1-benzyl-5-methoxy-2-phenyl-1H-indol-3-yl)malonate

**3d**

**3d**, white solid, 102 mg, 77% yield;  $^1\text{H}$  NMR (400 MHz,  $\text{CDCl}_3$ , TMS)  $\delta$  7.41-7.20 (m, 9H), 7.07-6.81 (m, 4H), 5.16 (s, 2H), 4.79 (s, 1H), 3.86 (s, 3H), 3.72 (s, 6H);  $^{13}\text{C}$  NMR (100 MHz,  $\text{CDCl}_3$ )  $\delta$  169.2, 154.4, 140.9, 137.8, 131.9, 130.7, 130.4, 128.8, 128.6, 128.5, 127.1, 127.0, 126.0, 112.5, 111.1, 104.9, 102.5, 55.8, 52.6, 49.7, 47.8; IR  $\nu/\text{cm}^{-1}$  2951, 1732, 1351, 1145, 734; HRMS-ESI ( $m/z$ ): calcd for  $\text{C}_{27}\text{H}_{26}\text{NO}_5^+$  ( $[\text{M}+\text{H}]^+$ ): 444.1805; Found: 444.1818.

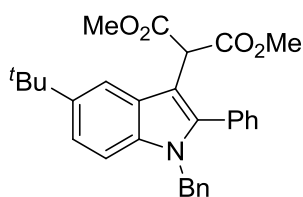

dimethyl 2-(1-benzyl-5-(tert-butyl)-2-phenyl-1H-indol-3-yl)malonate

**3e**

**3e**, white solid, 99 mg, 70% yield;  $^1\text{H}$  NMR (400 MHz,  $\text{CDCl}_3$ , TMS)  $\delta$  7.78 (s, 1H), 7.41 (t,  $J$  = 3.2 Hz, 3H), 7.35-7.33 (m, 2H), 7.27-7.20 (m, 4H), 7.12 (d,  $J$  = 8.8 Hz, 1H), 6.98 (d,  $J$  = 6.8 Hz, 2H), 5.15 (s, 2H), 4.80 (s, 1H), 3.71 (s, 6H), 1.39 (s, 9H);  $^{13}\text{C}$  NMR (100 MHz,  $\text{CDCl}_3$ )  $\delta$  169.2, 143.0, 140.4, 137.9, 135.0, 130.8, 130.6, 128.7, 128.5, 128.4, 127.1, 126.3, 126.2, 120.5, 116.6, 109.8, 105.3, 52.5, 49.8, 47.7, 34.6, 31.9; IR  $\nu/\text{cm}^{-1}$  2954, 1734, 1362, 1150, 734; HRMS-ESI ( $m/z$ ): calcd for  $\text{C}_{30}\text{H}_{32}\text{NO}_4^+$  ( $[\text{M}+\text{H}]^+$ ): 470.2326; Found: 470.2330.

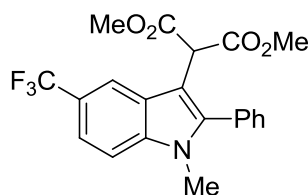

dimethyl 2-(1-methyl-2-phenyl-5-(trifluoromethyl)-1H-indol-3-yl)malonate

**3f**

**3f**, white solid, 49 mg, 40% yield;  $^1\text{H}$  NMR (400 MHz,  $\text{CDCl}_3$ , TMS)  $\delta$  8.06 (s, 1H), 7.55-7.40 (m, 7H), 4.78 (s, 1H), 3.71 (s, 6H), 3.61 (s, 3H);  $^{19}\text{F}$  NMR (376 MHz,  $\text{CDCl}_3$ )  $\delta$  -60.2 (s, 3F);  $^{13}\text{C}$  NMR (100 MHz,  $\text{CDCl}_3$ )  $\delta$  168.8, 142.0, 138.4, 130.7, 129.8, 129.2, 128.8, 125.6, 125.3 (q,  $J_{\text{C-F}} = 270.0$  Hz), 122.5 (q,  $J_{\text{C-F}} = 31.3$  Hz), 118.8 (q,  $J_{\text{C-F}} = 3.0$  Hz), 118.6 (q,  $J_{\text{C-F}} = 4.1$  Hz), 109.9, 105.7, 52.7, 49.6, 31.2; IR  $\nu/\text{cm}^{-1}$  2949, 1747, 1732, 1142, 1105, 846, 701; HRMS-ESI ( $m/z$ ): calcd for  $\text{C}_{21}\text{H}_{19}\text{F}_3\text{NO}_4^+$  ( $[\text{M}+\text{H}]^+$ ): 406.1261; Found: 406.1259.

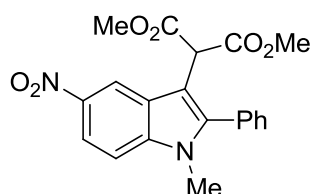

dimethyl 2-(1-methyl-5-nitro-2-phenyl-1H-indol-3-yl)malonate

**3g**

**3g**, yellow solid, 18 mg, 15% yield;  $^1\text{H}$  NMR (400 MHz,  $\text{CDCl}_3$ , TMS)  $\delta$  8.74 (d,  $J = 2.0$  Hz, 1H), 8.17 (dd,  $J = 9.2, 2.0$  Hz, 1H), 7.58-7.54 (m, 3H), 7.46-7.43 (m, 2H), 7.38 (m, 1H), 4.78 (s, 1H), 3.74 (s, 6H), 3.65 (s, 3H);  $^{13}\text{C}$  NMR (100 MHz,  $\text{CDCl}_3$ )  $\delta$  168.5, 143.4, 142.1, 140.0, 130.6, 129.5, 129.2, 128.9, 125.6, 118.3, 117.7, 109.6, 107.3, 52.9, 49.5, 31.5; IR  $\nu/\text{cm}^{-1}$  2853, 1734, 1319, 1150, 809, 750; HRMS-ESI ( $m/z$ ): calcd for  $\text{C}_{20}\text{H}_{19}\text{N}_2\text{O}_6^+$  ( $[\text{M}+\text{H}]^+$ ): 383.1238; Found: 383.1234.

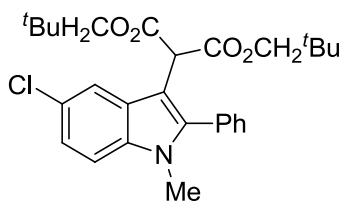

dineopentyl 2-(5-chloro-1-methyl-2-phenyl-1*H*-indol-3-yl)malonate

**3h**

**3h**, white solid, 88 mg, 61% yield;  $^1\text{H}$  NMR (400 MHz,  $\text{CDCl}_3$ , TMS)  $\delta$  7.79 (d,  $J = 2.0$  Hz, 1H), 7.54-7.49 (m, 3H), 7.44-7.42 (m, 2H), 7.25-7.17 (m, 2H), 4.74 (s, 1H), 3.85 (ABd,  $J_{AB} = 10.8$  Hz, 2H), 3.82 (ABd,  $J_{BA} = 10.8$  Hz, 2H), 3.57 (s, 3H), 0.87 (s, 18H);  $^{13}\text{C}$  NMR (100 MHz,  $\text{CDCl}_3$ )  $\delta$  168.6, 141.4, 135.7, 130.7, 130.1, 129.0, 128.6, 127.1, 125.6, 122.3, 120.8, 110.4, 104.8, 74.9, 50.0, 31.3, 31.1, 26.3; IR  $\nu/\text{cm}^{-1}$  2954, 2917, 1752, 1732, 1470, 1143, 706; HRMS-ESI ( $m/z$ ): calcd for  $\text{C}_{28}\text{H}_{35}\text{ClNO}_4^+$  ( $[\text{M}+\text{H}]^+$ ): 484.2249; Found: 484.2245.

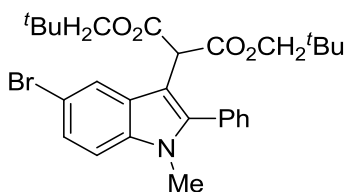

dineopentyl 2-(5-bromo-1-methyl-2-phenyl-1*H*-indol-3-yl)malonate

**3i**

**3i**, white solid, 99 mg, 62% yield;  $^1\text{H}$  NMR (400 MHz,  $\text{CDCl}_3$ , TMS)  $\delta$  7.95 (s, 1H), 7.52-7.42 (m, 5H), 7.31 (d,  $J = 8.4$  Hz, 1H), 7.18 (d,  $J = 8.4$  Hz, 1H), 4.74 (s, 1H), 3.87-3.81 (m, 4H), 3.55 (s, 3H), 0.88 (s, 18H);  $^{13}\text{C}$  NMR (100 MHz,  $\text{CDCl}_3$ )  $\delta$  168.5, 141.3, 135.9, 130.7, 130.0, 129.0, 128.6, 127.7, 124.9, 123.8, 113.2, 110.8, 104.7, 74.9, 50.1, 31.2, 31.1, 26.3; IR  $\nu/\text{cm}^{-1}$  2959, 1737, 1466, 1148, 702; HRMS-ESI ( $m/z$ ): calcd for  $\text{C}_{28}\text{H}_{35}\text{BrNO}_4^+$  ( $[\text{M}+\text{H}]^+$ ): 528.1744; Found: 528.1744.

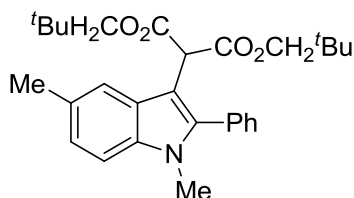

dineopentyl 2-(1,5-dimethyl-2-phenyl-1*H*-indol-3-yl)malonate

**3j**

**3j**, white solid, 97 mg, 70% yield;  $^1\text{H}$  NMR (400 MHz,  $\text{CDCl}_3$ , TMS)  $\delta$  7.59 (s, 1H), 7.53-7.43 (m, 5H), 7.22 (d,  $J = 8.4$  Hz, 1H), 7.06 (dd,  $J = 8.4, 1.2$  Hz, 1H), 4.76

(s, 1H), 3.84 (ABd,  $J_{AB}$  = 10.4 Hz, 2H), 3.80 (ABd,  $J_{BA}$  = 10.4 Hz, 2H), 3.56 (s, 3H), 2.45 (s, 3H), 0.87 (s, 18H);  $^{13}\text{C}$  NMR (100 MHz,  $\text{CDCl}_3$ )  $\delta$  168.9, 140.1, 135.7, 130.9, 130.8, 128.9, 128.53, 128.45, 126.4, 123.6, 121.0, 109.0, 104.5, 74.7, 50.1, 31.3, 30.9, 26.3, 21.5; IR  $\nu/\text{cm}^{-1}$  2957, 1732, 1367, 1147, 701; HRMS-ESI ( $m/z$ ): calcd for  $\text{C}_{29}\text{H}_{38}\text{NO}_4^+$  ( $[\text{M}+\text{H}]^+$ ): 464.2795; Found: 464.2799.

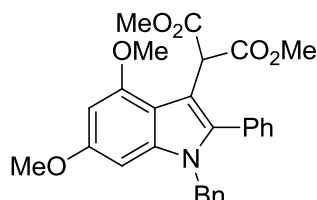

dimethyl 2-(1-benzyl-4,6-dimethoxy-2-phenyl-1*H*-indol-3-yl)malonate

**3k**

**3k**, white solid, 81 mg, 57% yield;  $^1\text{H}$  NMR (400 MHz,  $\text{CDCl}_3$ , TMS)  $\delta$  7.35-7.30 (m, 5H), 7.24-7.18 (m, 3H), 6.94 (d,  $J$  = 6.8 Hz, 2H), 6.23 (s, 2H), 5.22 (s, 1H), 5.08 (s, 2H), 3.84 (s, 3H), 3.72 (s, 3H), 3.56 (s, 6H);  $^{13}\text{C}$  NMR (100 MHz,  $\text{CDCl}_3$ )  $\delta$  169.5, 157.5, 154.3, 137.9, 137.7, 137.1, 131.1, 130.5, 128.5, 128.0, 126.9, 125.9, 111.9, 105.4, 92.1, 86.3, 55.5, 55.0, 52.1, 50.2, 47.6; IR  $\nu/\text{cm}^{-1}$  2950, 1734, 1338, 1151, 729; HRMS-ESI ( $m/z$ ): calcd for  $\text{C}_{28}\text{H}_{28}\text{NO}_6^+$  ( $[\text{M}+\text{H}]^+$ ): 474.1911; Found: 474.1928.

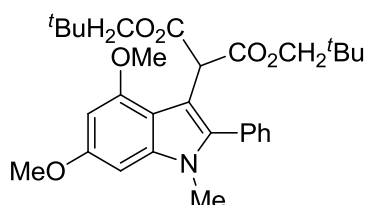

dineopentyl 2-(4,6-dimethoxy-1-methyl-2-phenyl-1*H*-indol-3-yl)malonate

**3l**

**3l**, white solid, 107 mg, 70% yield;  $^1\text{H}$  NMR (400 MHz,  $\text{CDCl}_3$ , TMS)  $\delta$  7.41 (s, 5H), 6.38 (s, 1H), 6.21 (s, 1H), 5.13 (s, 1H), 3.85 (s, 3H), 3.81 (s, 3H), 3.77 (ABd,  $J_{AB}$  = 10.4 Hz, 2H), 3.55 (ABd,  $J_{BA}$  = 10.4 Hz, 2H), 3.46 (s, 3H), 0.83 (s, 18H);  $^{13}\text{C}$  NMR (100 MHz,  $\text{CDCl}_3$ )  $\delta$  169.2, 157.4, 154.3, 138.3, 137.0, 131.1, 131.0, 128.2, 128.1, 111.6, 105.2, 91.8, 85.2, 74.3, 55.6, 54.9, 50.4, 31.1, 31.0, 26.3; IR  $\nu/\text{cm}^{-1}$  2957, 1731, 1148, 1042, 704; HRMS-ESI ( $m/z$ ): calcd for  $\text{C}_{30}\text{H}_{40}\text{NO}_6^+$  ( $[\text{M}+\text{H}]^+$ ): 510.2850; Found: 510.2851.

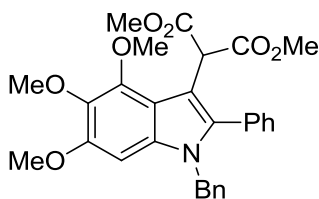

dimethyl 2-(1-benzyl-4,5,6-trimethoxy-2-phenyl-1*H*-indol-3-yl)malonate

**3m**

**3m**, white solid, 111 mg, 74% yield;  $^1\text{H}$  NMR (400 MHz,  $\text{CDCl}_3$ , TMS)  $\delta$  7.36–7.19 (m, 8H), 6.97 (d,  $J = 7.2$  Hz, 2H), 6.37 (s, 1H), 5.14 (s, 1H), 5.06 (s, 2H), 4.00 (s, 3H), 3.84 (s, 3H), 3.75 (s, 3H), 3.60 (s, 6H);  $^{13}\text{C}$  NMR (100 MHz,  $\text{CDCl}_3$ )  $\delta$  169.6, 151.4, 146.5, 138.2, 137.7, 136.5, 133.3, 131.1, 130.6, 128.7, 128.6, 128.2, 127.1, 126.1, 114.3, 105.3, 89.0, 61.0, 60.5, 56.3, 52.3, 50.0, 47.8; IR  $\nu/\text{cm}^{-1}$  2957, 1741, 1366, 1125, 734; HRMS-ESI ( $m/z$ ): calcd for  $\text{C}_{29}\text{H}_{30}\text{NO}_7^+$  ( $[\text{M}+\text{H}]^+$ ): 504.2017; Found: 504.2019.

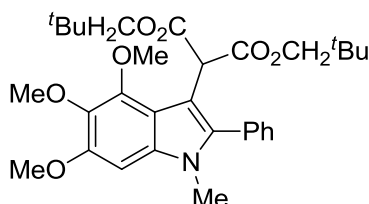

dineopentyl 2-(4,5,6-trimethoxy-1-methyl-2-phenyl-1*H*-indol-3-yl)malonate

**3n**

**3n**, white solid, 131 mg, 81% yield;  $^1\text{H}$  NMR (400 MHz,  $\text{CDCl}_3$ , TMS)  $\delta$  7.46–7.37 (m, 5H), 6.53 (s, 1H), 5.01 (s, 1H), 4.01 (s, 3H), 3.93 (s, 3H), 3.84 (s, 3H), 3.80 (ABd,  $J_{AB} = 10.4$  Hz, 2H), 3.64 (ABd,  $J_{BA} = 10.8$  Hz, 2H), 3.47 (s, 3H), 0.86 (s, 18H);  $^{13}\text{C}$  NMR (100 MHz,  $\text{CDCl}_3$ )  $\delta$  169.2, 151.2, 146.5, 138.0, 136.2, 133.7, 131.0, 130.9, 128.3, 128.2, 113.9, 105.0, 88.0, 74.4, 60.9, 60.5, 56.2, 50.0, 31.1, 31.0, 26.3; IR  $\nu/\text{cm}^{-1}$  2961, 1731, 1366, 1231, 766; HRMS-ESI ( $m/z$ ): calcd for  $\text{C}_{31}\text{H}_{42}\text{NO}_7^+$  ( $[\text{M}+\text{H}]^+$ ): 540.2956; Found: 540.2956.

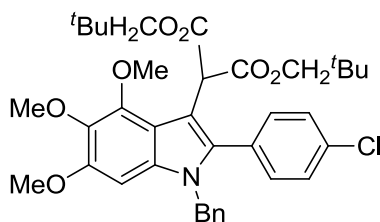

dineopentyl 2-(1-benzyl-2-(4-chlorophenyl)-4,5,6-trimethoxy-1*H*-indol-3-yl)malonate

**3o**

**3o**, white solid, 147 mg, 76% yield;  $^1\text{H}$  NMR (400 MHz,  $\text{CDCl}_3$ , TMS)  $\delta$  7.31-7.21 (m, 7H), 6.90-6.88 (m, 2H), 6.36 (s, 1H), 5.06 (m, 3H), 4.01 (s, 3H), 3.82 (s, 3H), 3.77-3.75 (m, 5H), 3.65 (ABd,  $J_{BA} = 10.4$  Hz, 2H), 0.84 (s, 18H);  $^{13}\text{C}$  NMR (100 MHz,  $\text{CDCl}_3$ )  $\delta$  168.9, 151.5, 146.6, 137.6, 136.6, 136.3, 134.7, 133.4, 132.3, 129.2, 128.6, 128.5, 127.1, 125.8, 114.3, 106.4, 88.5, 74.5, 60.9, 60.5, 56.1, 50.0, 47.5, 31.1, 26.3; IR  $\nu/\text{cm}^{-1}$  2956, 1731, 1367, 1122, 723; HRMS-ESI ( $m/z$ ): calcd for  $\text{C}_{37}\text{H}_{45}\text{ClNO}_7^+$  ( $[\text{M}+\text{H}]^+$ ): 650.2879; Found: 650.2878.

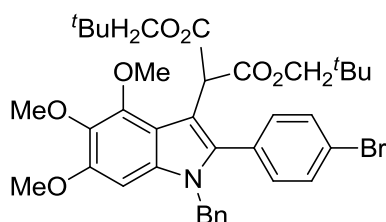

dineopentyl 2-(1-benzyl-2-(4-bromophenyl)-4,5,6-trimethoxy-1H-indol-3-yl)malonate

### 3p

**3p**, white solid, 154 mg, 74% yield;  $^1\text{H}$  NMR (400 MHz,  $\text{CDCl}_3$ , TMS)  $\delta$  7.46 (d,  $J = 8.4$  Hz, 2H), 7.25-7.15 (m, 5H), 6.90-6.88 (m, 2H), 6.35 (s, 1H), 5.07 (s, 1H), 5.06 (s, 2H), 4.01 (s, 3H), 3.82 (s, 3H), 3.77-3.75 (m, 5H), 3.64 (ABd,  $J_{BA} = 10.8$  Hz, 2H), 0.84 (s, 18H);  $^{13}\text{C}$  NMR (100 MHz,  $\text{CDCl}_3$ )  $\delta$  168.9, 151.5, 146.6, 137.6, 136.6, 136.3, 133.4, 132.6, 131.4, 129.6, 128.6, 127.1, 125.8, 123.0, 114.3, 106.4, 88.5, 74.5, 60.9, 60.5, 56.1, 50.0, 47.5, 31.1, 26.3; IR  $\nu/\text{cm}^{-1}$  2956, 1730, 1368, 1122, 721; HRMS-ESI ( $m/z$ ): calcd for  $\text{C}_{37}\text{H}_{45}\text{BrNO}_7^+$  ( $[\text{M}+\text{H}]^+$ ): 694.2374; Found: 694.2372.

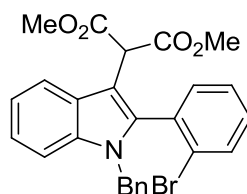

dimethyl 2-(1-benzyl-2-(2-bromophenyl)-1H-indol-3-yl)malonate

### 3q

**3q**, white solid, 103 mg, 70% yield;  $^1\text{H}$  NMR (400 MHz,  $\text{CDCl}_3$ , TMS)  $\delta$  7.82-7.80 (m, 1H), 7.70-7.68 (m, 1H), 7.33-7.16 (m, 9H), 6.91-6.88 (m, 2H), 5.25 (ABd,  $J_{AB} = 16.8$  Hz, 1H), 4.99 (ABd,  $J_{BA} = 16.4$  Hz, 1H), 4.56 (s, 1H), 3.71 (s, 3H), 3.68 (s, 3H);  $^{13}\text{C}$  NMR (100 MHz,  $\text{CDCl}_3$ )  $\delta$  169.0, 168.7, 138.5, 137.2, 136.5, 133.6, 132.8, 131.7, 130.9, 128.4, 127.3, 127.2, 126.4, 126.3, 125.9, 122.4, 120.9, 120.2, 110.3, 106.0, 52.6,

52.5, 49.7, 47.8; IR  $\nu/\text{cm}^{-1}$  2948, 1742, 1455, 1291, 1134, 741; HRMS-ESI ( $m/z$ ): calcd for  $\text{C}_{26}\text{H}_{23}\text{BrNO}_4^+$  ( $[\text{M}+\text{H}]^+$ ): 492.0805; Found: 492.0815.

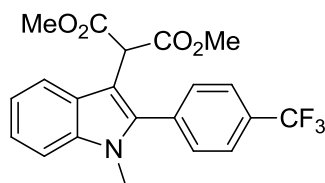

dimethyl 2-(1-methyl-2-(4-(trifluoromethyl)phenyl)-1H-indol-3-yl)malonate

**3r**

**3r**, white solid, 64 mg, 52% yield;  $^1\text{H}$  NMR (400 MHz,  $\text{CDCl}_3$ , TMS)  $\delta$  7.79-7.77 (m, 3H), 7.60-7.58 (m, 2H), 7.35 (d,  $J = 8.4$  Hz, 1H), 7.28 (t,  $J = 7.6$  Hz, 1H), 7.19 (t,  $J = 7.4$  Hz, 1H), 4.75 (s, 1H), 3.68 (s, 6H), 3.58 (s, 3H);  $^{19}\text{F}$  NMR (376 MHz,  $\text{CDCl}_3$ )  $\delta$  -62.6 (s, 3F);  $^{13}\text{C}$  NMR (100 MHz,  $\text{CDCl}_3$ )  $\delta$  168.9, 138.3, 137.3, 134.3, 131.2, 130.7 (q,  $J_{\text{C-F}} = 31.6$  Hz), 126.1, 125.5 (q,  $J_{\text{C-F}} = 3.3$  Hz), 123.9 (q,  $J_{\text{C-F}} = 270.3$  Hz), 122.6, 120.9, 120.4, 109.6, 105.5, 52.6, 49.6, 31.0; IR  $\nu/\text{cm}^{-1}$  2955, 1724, 1322, 1162, 1107, 755; HRMS-ESI ( $m/z$ ): calcd for  $\text{C}_{21}\text{H}_{19}\text{F}_3\text{NO}_4^+$  ( $[\text{M}+\text{H}]^+$ ): 406.1261; Found: 406.1258.

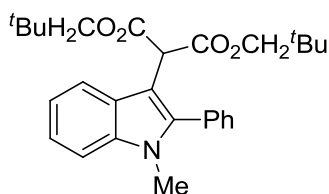

dineopentyl 2-(1-methyl-2-phenyl-1H-indol-3-yl)malonate

**3s**

**3s**, white solid, 2.59 g, 72% yield;  $^1\text{H}$  NMR (400 MHz,  $\text{CDCl}_3$ , TMS)  $\delta$  7.80 (d,  $J = 8.0$  Hz, 1H), 7.52-7.44 (m, 5H), 7.34 (d,  $J = 8.4$  Hz, 1H), 7.27-7.23 (m, 1H), 7.17-7.13 (m, 1H), 4.78 (s, 1H), 3.84 (ABd,  $J_{\text{AB}} = 10.4$  Hz, 2H), 3.79 (ABd,  $J_{\text{BA}} = 10.4$  Hz, 2H), 3.60 (s, 3H), 0.86 (s, 18H);  $^{13}\text{C}$  NMR (100 MHz,  $\text{CDCl}_3$ )  $\delta$  168.8, 140.1, 137.2, 130.8, 130.6, 128.6, 128.5, 126.2, 122.0, 121.3, 119.8, 109.3, 105.1, 74.6, 50.1, 31.3, 30.9, 26.3; IR  $\nu/\text{cm}^{-1}$  2952, 1750, 1401, 1296, 1150, 737; HRMS-ESI ( $m/z$ ): calcd for  $\text{C}_{28}\text{H}_{36}\text{NO}_4^+$  ( $[\text{M}+\text{H}]^+$ ): 450.2639; Found: 450.2629.



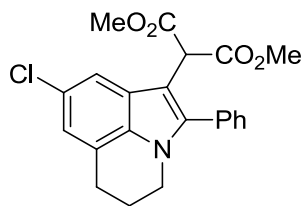

dimethyl 2-(8-chloro-2-phenyl-5,6-dihydro-4*H*-pyrrolo[3,2,1-*ij*]quinolin-1-yl)malonate

**5a**

**5a**, white solid, 98 mg, 82% yield;  $^1\text{H}$  NMR (400 MHz,  $\text{CDCl}_3$ , TMS)  $\delta$  7.55-7.44 (m, 6H), 6.94 (s, 1H), 4.80 (s, 1H), 3.96 (t,  $J = 5.6$  Hz, 2H), 3.73 (s, 6H), 2.97 (t,  $J = 6.0$  Hz, 2H), 2.20-2.14 (m, 2H);  $^{13}\text{C}$  NMR (100 MHz,  $\text{CDCl}_3$ )  $\delta$  169.0, 139.5, 132.6, 130.3, 129.8, 128.75, 128.68, 125.7, 125.0, 123.1, 119.6, 117.7, 103.7, 52.6, 49.5, 43.0, 24.7, 22.6; IR  $\nu/\text{cm}^{-1}$  2950, 1732, 1362, 1144, 703; HRMS-ESI ( $m/z$ ): calcd for  $\text{C}_{22}\text{H}_{21}\text{ClNO}_4^+$  ( $[\text{M}+\text{H}]^+$ ): 398.1154; Found: 398.1159.

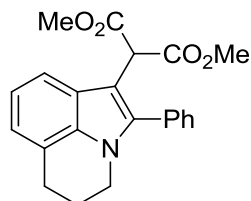

dimethyl 2-(2-phenyl-5,6-dihydro-4*H*-pyrrolo[3,2,1-*ij*]quinolin-1-yl)malonate

**5b**

**5b**, white solid, 83 mg, 76% yield;  $^1\text{H}$  NMR (400 MHz,  $\text{CDCl}_3$ , TMS)  $\delta$  7.57-7.43 (m, 6H), 7.07 (t,  $J = 7.6$  Hz, 1H), 6.96 (d,  $J = 7.2$  Hz, 1H), 4.85 (s, 1H), 3.98 (t,  $J = 5.6$  Hz, 2H), 3.71 (s, 6H), 3.00 (t,  $J = 5.8$  Hz, 2H), 2.21-2.15 (m, 2H);  $^{13}\text{C}$  NMR (100 MHz,  $\text{CDCl}_3$ )  $\delta$  169.3, 138.4, 134.2, 130.4, 130.3, 128.6, 128.5, 124.4, 121.8, 120.1, 119.1, 118.3, 103.9, 52.5, 49.7, 43.1, 25.0, 22.8; IR  $\nu/\text{cm}^{-1}$  2948, 1734, 1345, 1145, 748; HRMS-ESI ( $m/z$ ): calcd for  $\text{C}_{22}\text{H}_{22}\text{NO}_4^+$  ( $[\text{M}+\text{H}]^+$ ): 364.1543; Found: 364.1549.

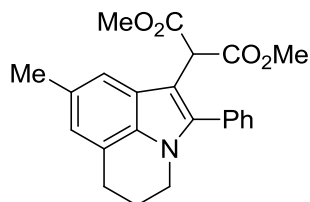

dimethyl 2-(8-methyl-2-phenyl-5,6-dihydro-4*H*-pyrrolo[3,2,1-*ij*]quinolin-1-yl)malonate

**5c**

**5c**, white solid, 98 mg, 86% yield;  $^1\text{H}$  NMR (400 MHz,  $\text{CDCl}_3$ , TMS)  $\delta$  7.52-7.42 (m, 5H), 7.34 (s, 1H), 6.80 (s, 1H), 4.82 (s, 1H), 3.96 (t,  $J = 5.6$  Hz, 2H), 3.71 (s, 6H), 2.96 (t,  $J = 6.0$  Hz, 2H), 2.45 (s, 3H), 2.19-2.13 (m, 2H);  $^{13}\text{C}$  NMR (100 MHz,  $\text{CDCl}_3$ )

$\delta$  169.4, 138.4, 132.6, 130.5, 130.4, 129.5, 128.5, 128.4, 124.5, 121.4, 120.9, 117.6, 103.4, 52.5, 49.7, 43.1, 24.9, 22.9, 21.9; IR  $\nu$ /  $\text{cm}^{-1}$  2949, 1732, 1362, 1145, 735; HRMS-ESI ( $m/z$ ): calcd for  $\text{C}_{23}\text{H}_{24}\text{NO}_4^+$  ( $[\text{M}+\text{H}]^+$ ): 378.1700; Found: 378.1705.

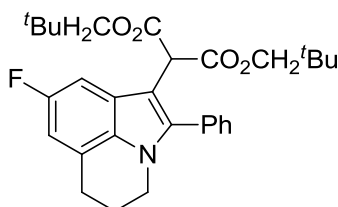

dineopentyl 2-(8-fluoro-2-phenyl-5,6-dihydro-4*H*-pyrrolo[3,2-*ij*]quinolin-1-yl)malonate

### 5d

**5d**, white solid, 95 mg, 64% yield;  $^1\text{H}$  NMR (400 MHz,  $\text{CDCl}_3$ , TMS)  $\delta$  7.52-7.43 (m, 5H), 7.29-7.25 (m, 1H), 6.73-6.70 (m, 1H), 4.82 (s, 1H), 3.96 (t,  $J = 5.6$  Hz, 2H), 3.87 (ABd,  $J_{AB} = 10.8$  Hz, 2H), 3.82 (ABd,  $J_{BA} = 10.8$  Hz, 2H), 2.96 (t,  $J = 6.0$  Hz, 2H), 2.18-2.12 (m, 2H), 0.89 (s, 18H);  $^{19}\text{F}$  NMR (376 MHz,  $\text{CDCl}_3$ )  $\delta$  -123.8 (t,  $J = 10.0$  Hz, 1F);  $^{13}\text{C}$  NMR (100 MHz,  $\text{CDCl}_3$ )  $\delta$  168.7, 158.2 (d,  $J_{\text{C-F}} = 233.0$  Hz), 139.6, 130.8, 130.4, 130.1, 128.6, 124.2 (d,  $J_{\text{C-F}} = 11.3$  Hz), 122.7 (d,  $J_{\text{C-F}} = 9.6$  Hz), 108.0 (d,  $J_{\text{C-F}} = 26.2$  Hz), 104.5 (d,  $J_{\text{C-F}} = 5.3$  Hz), 103.7 (d,  $J_{\text{C-F}} = 24.9$  Hz), 74.8, 49.9, 43.0, 31.3, 26.3, 25.0, 22.7; IR  $\nu$ /  $\text{cm}^{-1}$  2957, 1735, 1369, 1152, 704; HRMS-ESI ( $m/z$ ): calcd for  $\text{C}_{30}\text{H}_{37}\text{FNO}_4^+$  ( $[\text{M}+\text{H}]^+$ ): 494.2701; Found: 494.2702.

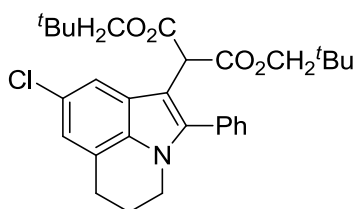

dineopentyl 2-(8-chloro-2-phenyl-5,6-dihydro-4*H*-pyrrolo[3,2-*ij*]quinolin-1-yl)malonate

### 5e

**5e**, white solid, 96 mg, 63% yield;  $^1\text{H}$  NMR (400 MHz,  $\text{CDCl}_3$ , TMS)  $\delta$  7.60 (d,  $J = 1.6$  Hz, 1H), 7.53-7.44 (m, 5H), 6.91 (d,  $J = 1.2$  Hz, 1H), 4.81 (s, 1H), 3.95 (t,  $J = 5.6$  Hz, 2H), 3.87 (ABd,  $J_{AB} = 10.4$  Hz, 2H), 3.83 (ABd,  $J_{BA} = 10.4$  Hz, 2H), 2.95 (t,  $J = 6.0$  Hz, 2H), 2.17-2.11 (m, 2H), 0.90 (s, 18H);  $^{13}\text{C}$  NMR (100 MHz,  $\text{CDCl}_3$ )  $\delta$  168.7, 139.5, 132.7, 130.4, 129.9, 128.7, 128.6, 125.5, 125.0, 122.9, 119.5, 118.4, 104.1, 74.9, 49.9, 43.0, 31.3, 26.3, 24.8, 22.6; IR  $\nu$ /  $\text{cm}^{-1}$  2958, 1726, 1366, 1006, 727; HRMS-ESI ( $m/z$ ): calcd for  $\text{C}_{30}\text{H}_{37}\text{ClNO}_4^+$  ( $[\text{M}+\text{H}]^+$ ): 510.2406; Found: 510.2398.

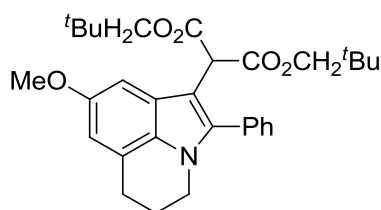

dineopentyl 2-(8-methoxy-2-phenyl-5,6-dihydro-4*H*-pyrrolo[3,2,1-*ij*]quinolin-1-yl)malonate

**5f**

**5f**, white solid, 101 mg, 67% yield;  $^1\text{H}$  NMR (400 MHz,  $\text{CDCl}_3$ , TMS)  $\delta$  7.51-7.41 (m, 5H), 7.08 (d,  $J = 1.2$  Hz, 1H), 6.63 (s, 1H), 4.85 (s, 1H), 3.95 (t,  $J = 5.6$  Hz, 2H), 3.89 (ABd,  $J_{AB} = 10.8$  Hz, 2H), 3.84 (s, 3H), 3.81 (ABd,  $J_{BA} = 10.4$  Hz, 2H), 2.94 (t,  $J = 5.8$  Hz, 2H), 2.16-2.11 (m, 2H), 0.90 (s, 18H);  $^{13}\text{C}$  NMR (100 MHz,  $\text{CDCl}_3$ )  $\delta$  168.8, 154.5, 138.5, 130.5, 130.4, 129.7, 128.5, 128.3, 124.3, 122.5, 110.1, 104.0, 100.2, 74.5, 55.8, 49.9, 43.0, 31.3, 26.3, 24.9, 22.9; IR  $\nu/\text{cm}^{-1}$  2956, 1739, 1366, 1137, 731; HRMS-ESI ( $m/z$ ): calcd for  $\text{C}_{31}\text{H}_{40}\text{NO}_5^+$  ( $[\text{M}+\text{H}]^+$ ): 506.2901; Found: 506.2902.

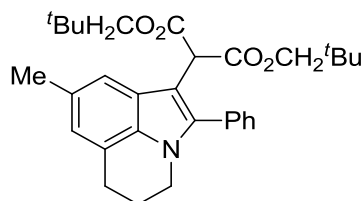

dineopentyl 2-(8-methyl-2-phenyl-5,6-dihydro-4*H*-pyrrolo[3,2,1-*ij*]quinolin-1-yl)malonate

**5g**

**5g**, white solid, 101 mg, 69% yield;  $^1\text{H}$  NMR (400 MHz,  $\text{CDCl}_3$ , TMS)  $\delta$  7.49-7.40 (m, 6H), 6.77 (s, 1H), 4.83 (s, 1H), 3.95 (t,  $J = 5.6$  Hz, 2H), 3.86 (ABd,  $J_{AB} = 10.4$  Hz, 2H), 3.80 (ABd,  $J_{BA} = 10.4$  Hz, 2H), 2.95 (t,  $J = 6.0$  Hz, 2H), 2.42 (s, 3H), 2.18-2.12 (m, 2H), 0.90 (s, 18H);  $^{13}\text{C}$  NMR (100 MHz,  $\text{CDCl}_3$ )  $\delta$  168.9, 138.3, 132.8, 130.7, 130.5, 129.0, 128.5, 128.2, 124.5, 121.2, 120.8, 118.4, 103.8, 74.7, 50.0, 43.1, 31.3, 26.4, 24.9, 23.0, 21.8; IR  $\nu/\text{cm}^{-1}$  2959, 1724, 1365, 1145, 703; HRMS-ESI ( $m/z$ ): calcd for  $\text{C}_{31}\text{H}_{40}\text{NO}_4^+$  ( $[\text{M}+\text{H}]^+$ ): 490.2952; Found: 490.2954.

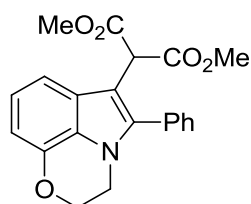

dimethyl 2-(5-phenyl-2,3-dihydro-[1,4]oxazino[2,3,4-*hi*]indol-6-yl)malonate

**5h**

**5h**, white solid, 51 mg, 47% yield;  $^1\text{H}$  NMR (400 MHz,  $\text{CDCl}_3$ , TMS)  $\delta$  7.54-7.45 (m, 5H), 7.32 (d,  $J$  = 8.4 Hz, 1H), 7.03 (t,  $J$  = 7.8 Hz, 1H), 6.70 (d,  $J$  = 7.6 Hz, 1H), 4.87 (s, 1H), 4.49 (t,  $J$  = 4.8 Hz, 2H), 4.13 (t,  $J$  = 4.8 Hz, 2H), 3.73 (s, 6H);  $^{13}\text{C}$  NMR (100 MHz,  $\text{CDCl}_3$ )  $\delta$  169.1, 143.0, 137.8, 130.1, 129.5, 128.8, 128.7, 126.3, 125.4, 121.0, 113.7, 105.7, 105.3, 65.4, 52.6, 49.6, 42.9; IR  $\nu/\text{cm}^{-1}$  2920, 1727, 1445, 1299, 1212, 1141, 732; HRMS-ESI ( $m/z$ ): calcd for  $\text{C}_{21}\text{H}_{20}\text{NO}_5^+$  ( $[\text{M}+\text{H}]^+$ ): 366.1336; Found: 366.1345.

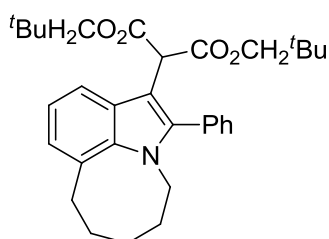

dineopentyl 2-(2-phenyl-5,6,7,8-tetrahydro-4H-azocino[3,2,1-*hi*]indol-1-yl)malonate

**5i**

**5i**, white solid, 48 mg, 32% yield;  $^1\text{H}$  NMR (400 MHz,  $\text{CDCl}_3$ , TMS)  $\delta$  7.64 (d,  $J$  = 8.0 Hz, 1H), 7.48-7.39 (m, 5H), 7.01 (t,  $J$  = 7.4 Hz, 1H), 6.88 (d,  $J$  = 6.8 Hz, 1H), 4.68 (s, 1H), 4.27 (s, 2H), 3.79 (s, 4H), 3.27 (s, 2H), 1.92-1.88 (m, 2H), 1.83-1.80 (m, 2H), 1.49-1.48 (m, 2H), 0.82 (s, 18H);  $^{13}\text{C}$  NMR (100 MHz,  $\text{CDCl}_3$ )  $\delta$  168.9, 140.0, 137.3, 131.2, 130.9, 128.7, 128.4, 126.1, 124.3, 124.0, 119.9, 119.2, 105.0, 74.5, 50.2, 44.2, 32.5, 31.3, 30.9, 29.7, 26.3, 21.3; IR  $\nu/\text{cm}^{-1}$  2960, 1752, 1738 1366, 1140, 742; HRMS-ESI ( $m/z$ ): calcd for  $\text{C}_{32}\text{H}_{42}\text{NO}_4^+$  ( $[\text{M}+\text{H}]^+$ ): 504.3108; Found: 504.3104.

## 4. Proposed Mechanism

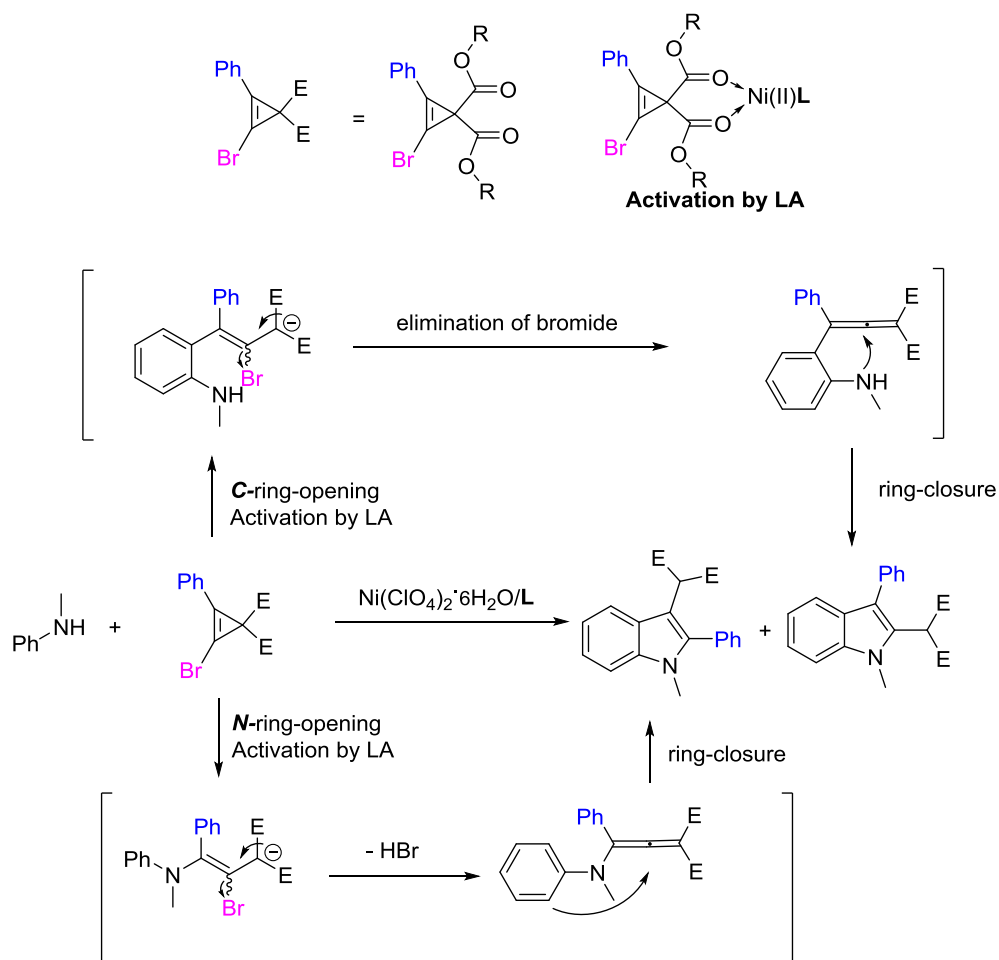

## 5. Chemical Transformation of the Products

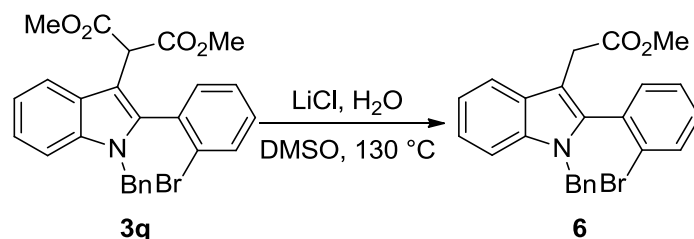

**3q** (257.3 mg, 0.52 mmol) was dissolved in DMSO (2.0 mL) and water (10.0 uL, 0.56 mmol), and then LiCl (45.0 mg, 1.04 mmol) was added under Ar. The reaction mixture was stirred for 13 h at 130 °C, cooled to rt, quenched by the addition of 2.5 N NaOH, and extracted with Et<sub>2</sub>O. The combined organic layers were washed with brine and dried over Na<sub>2</sub>SO<sub>4</sub>. After concentration in vacuo, the residue was purified by column chromatography on silica gel to provide the **6** (188.4 mg, 84% yield) as white solid. <sup>1</sup>H NMR (400 MHz, CDCl<sub>3</sub>, TMS) δ 7.70-7.67 (m, 2H), 7.30-7.15 (m, 9H), 6.89-6.86 (m, 2H), 5.25 (AB, *J*<sub>AB</sub> = 16.4 Hz, 1H), 5.02 (AB, *J*<sub>BA</sub> = 16.4 Hz, 1H), 3.68 (AB, *J*<sub>AB</sub> = 15.6 Hz, 1H), 3.60 (s, 3H), 3.53 (AB, *J*<sub>BA</sub> = 16.0 Hz, 1H); <sup>13</sup>C NMR (100 MHz, CDCl<sub>3</sub>) δ 172.1, 137.6 (2C), 136.3, 133.6, 132.8, 132.4, 130.5, 128.4, 127.5, 127.2, 127.1, 126.4, 125.8, 122.3, 119.9, 119.3, 110.3, 106.9, 51.8, 47.7, 30.8; IR ν/cm<sup>-1</sup> 2920, 1732, 1453, 1186, 1026, 739; HRMS-ESI (*m/z*): calcd for C<sub>24</sub>H<sub>24</sub>BrN<sub>2</sub>O<sub>2</sub><sup>+</sup> ([M+NH<sub>4</sub>]<sup>+</sup>): 451.1016; Found: 451.1025.

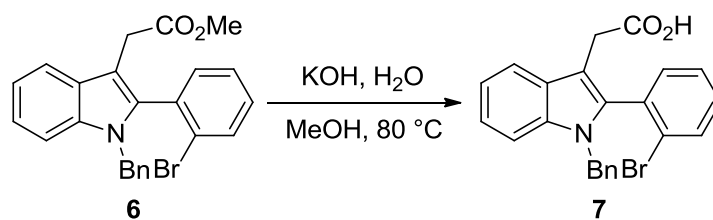

**6** (120.0 mg, 0.28 mmol) was dissolved in MeOH (2.0 mL) and water (1.0 mL), and then KOH (157.0 mg, 2.8 mmol) was added under Ar. The reaction mixture was stirred for 2 h at 80 °C, cooled to rt, quenched by the addition of 2.5 N HCl, and extracted with EA. The combined organic layers were washed with brine and dried over Na<sub>2</sub>SO<sub>4</sub>. After concentration in vacuo, the residue was purified by column chromatography on silica gel to provide the **7** (107.9 mg, 92% yield) as white solid. <sup>1</sup>H

NMR (400 MHz, CDCl<sub>3</sub>, TMS)  $\delta$  7.70-7.65 (m, 2H), 7.30-7.16 (m, 9H), 6.89-6.87 (m, 2H), 5.25 (AB,  $J_{AB}$  = 16.4 Hz, 1H), 5.02 (AB,  $J_{BA}$  = 16.4 Hz, 1H), 3.70 (AB,  $J_{AB}$  = 16.0 Hz, 1H), 3.53 (AB,  $J_{BA}$  = 16.0 Hz, 1H); <sup>13</sup>C NMR (100 MHz, CDCl<sub>3</sub>)  $\delta$  177.7, 137.9, 137.5, 136.3, 133.6, 132.8, 132.1, 130.6, 128.4, 127.34, 127.29, 127.1, 126.4, 125.7, 122.4, 120.0, 119.3, 110.4, 106.3, 47.8, 30.7; IR  $\nu$ / cm<sup>-1</sup> 3029, 1704, 1495, 1345, 1184, 1027, 740; HRMS-ESI ( $m/z$ ): calcd for C<sub>23</sub>H<sub>19</sub>BrNO<sub>2</sub><sup>+</sup> ([M+H]<sup>+</sup>): 420.0594; Found: 420.0599.

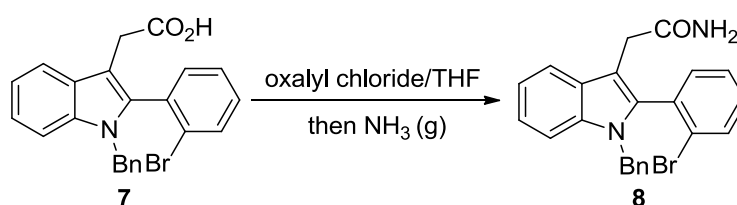

**7** (95.0 mg, 0.23 mmol) was dissolved in THF (1.0 mL), and then oxalyl chloride (45.0 mg, 0.35 mmol) was added under Ar. The reaction mixture was stirred for 2 h at 50 °C, cooled to rt, and pure NH<sub>3</sub> (g) was bubbled into the mixture for 20 min, and water was added and the mixture was extracted with DCM, and the organic layer was washed with brine and dried over Na<sub>2</sub>SO<sub>4</sub>. After concentration in vacuo, the residue was purified by column chromatography on silica gel to provide the **8** (80.7 mg, 84% yield) as white solid. <sup>1</sup>H NMR (400 MHz, CDCl<sub>3</sub>, TMS)  $\delta$  7.72-7.67 (m, 2H), 7.33-7.16 (m, 9H), 6.87-6.85 (m, 2H), 5.73 (s, 1H), 5.39 (s, 1H), 5.30 (AB,  $J_{AB}$  = 16.4 Hz, 1H), 5.02 (AB,  $J_{BA}$  = 16.4 Hz, 1H), 3.60 (AB,  $J_{AB}$  = 17.6 Hz, 1H), 3.54 (AB,  $J_{BA}$  = 17.6 Hz, 1H); <sup>13</sup>C NMR (100 MHz, CDCl<sub>3</sub>)  $\delta$  173.9, 138.0, 137.3, 136.5, 133.2, 132.9, 131.9, 130.9, 128.4, 127.6, 127.3, 127.0, 126.4, 125.6, 122.8, 120.2, 119.1, 110.5, 107.4, 47.8, 32.4; IR  $\nu$ / cm<sup>-1</sup> 3458, 1668, 1457, 1343, 1186, 1026, 741; HRMS-ESI ( $m/z$ ): calcd for C<sub>23</sub>H<sub>20</sub>BrN<sub>2</sub>O<sup>+</sup> ([M+H]<sup>+</sup>): 419.0754; Found: 419.0759.

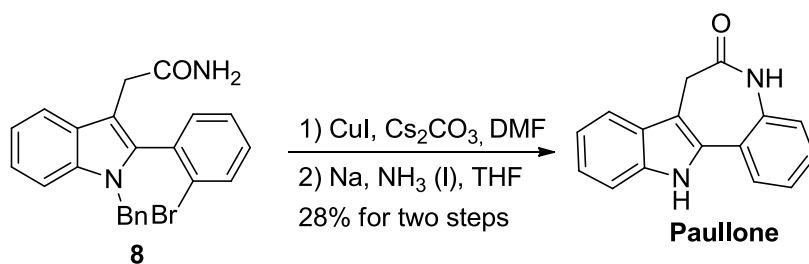

**8** (46.5 mg, 0.11 mmol), CuI (11.4 mg, 0.06 mmol), Cs<sub>2</sub>CO<sub>3</sub> (91.3 mg, 0.28 mmol) was added in a Schlenk tube. The tube was evacuated and backfilled with argon before 0.5 mL DMF was added. The reaction mixture was stirred at 110 °C for 48 h. After the reaction mixture was cooled to rt, and water was added and the mixture was extracted with EtOAc, and the organic layer was washed with brine and dried over Na<sub>2</sub>SO<sub>4</sub>. After concentration in vacuo, the residue was purified by column chromatography on silica gel to yield the corresponding product. Then to the solution of sodium (3.5 mg, 0.15 mmol) in liquid ammonia (1.0 mL) was add the corresponding product in THF (0.5 mL) at -78 °C. The reaction was quenched by adding NH<sub>4</sub>Cl after 20 min. Water was added and the mixture was extracted with EtOAc, and the organic layer was washed with brine and dried over Na<sub>2</sub>SO<sub>4</sub>. After concentration in vacuo, the residue was purified by column chromatography on silica gel to provide the **Paullone** (28% yield for two steps) as pale yellow solid. <sup>1</sup>H NMR (400 MHz, DMSO-d<sub>6</sub>, TMS) δ 11.64 (s, 1H), 10.15 (s, 1H), 7.79-7.69 (m, 2H), 7.49-7.09 (m, 6H), 3.54 (s, 2H); <sup>13</sup>C NMR (100 MHz, DMSO-d<sub>6</sub>) δ 172.1, 137.9, 135.9, 133.0, 128.5, 127.4, 127.0, 124.2, 123.4, 122.8, 122.6, 119.6, 118.5, 112.0, 108.1, 32.1; HRMS-ESI (*m/z*): calcd for C<sub>16</sub>H<sub>11</sub>N<sub>2</sub>O<sup>+</sup> ([M-H]<sup>+</sup>): 247.0877; Found: 247.0878. All the analytical data are consistent with the reported values<sup>5</sup>.



## 6. X-ray Crystallographic Data

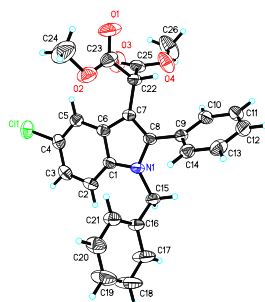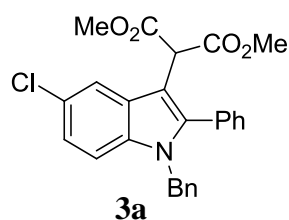

### Crystal data and structure refinement for **3a**

|                                   |                                                     |                   |
|-----------------------------------|-----------------------------------------------------|-------------------|
| Empirical formula                 | C <sub>26</sub> H <sub>22</sub> Cl N O <sub>4</sub> |                   |
| Formula weight                    | 447.89                                              |                   |
| Temperature                       | 296(2) K                                            |                   |
| Wavelength                        | 0.71073 Å                                           |                   |
| Crystal system                    | Monoclinic                                          |                   |
| Space group                       | P 2 <sub>1</sub> /n                                 |                   |
| Unit cell dimensions              | a = 11.1236(3) Å                                    | α = 90 °          |
|                                   | b = 13.5248(4) Å                                    | β = 98.4720(10) ° |
|                                   | c = 15.1885(5) Å                                    | γ = 90 °          |
| Volume                            | 2260.09(12) Å <sup>3</sup>                          |                   |
| Z                                 | 4                                                   |                   |
| Density (calculated)              | 1.316 Mg/m <sup>3</sup>                             |                   |
| Absorption coefficient            | 0.202 mm <sup>-1</sup>                              |                   |
| F(000)                            | 936                                                 |                   |
| Crystal size                      | 0.200 x 0.170 x 0.120 mm <sup>3</sup>               |                   |
| Theta range for data collection   | 2.606 to 24.998 °                                   |                   |
| Index ranges                      | -12 ≤ h ≤ 13, -15 ≤ k ≤ 16, -18 ≤ l ≤ 18            |                   |
| Reflections collected             | 23223                                               |                   |
| Independent reflections           | 3944 [R(int) = 0.0774]                              |                   |
| Completeness to theta = 25.242 °  | 96.5 %                                              |                   |
| Absorption correction             | Semi-empirical from equivalents                     |                   |
| Max. and min. transmission        | 0.7456 and 0.4823                                   |                   |
| Refinement method                 | Full-matrix least-squares on F <sup>2</sup>         |                   |
| Data / restraints / parameters    | 3944 / 0 / 292                                      |                   |
| Goodness-of-fit on F <sup>2</sup> | 1.038                                               |                   |
| Final R indices [I > 2σ(I)]       | R1 = 0.0689, wR2 = 0.1951                           |                   |
| R indices (all data)              | R1 = 0.0875, wR2 = 0.2203                           |                   |
| Extinction coefficient            | 0.039(7)                                            |                   |
| Largest diff. peak and hole       | 0.689 and -0.323 e.Å <sup>-3</sup>                  |                   |

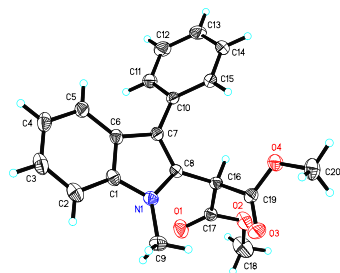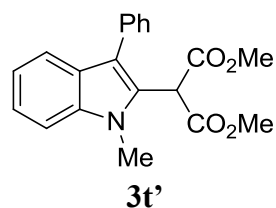

#### Crystal data and structure refinement for **3t'**

|                                   |                                                  |                  |
|-----------------------------------|--------------------------------------------------|------------------|
| Empirical formula                 | C <sub>20</sub> H <sub>19</sub> N O <sub>4</sub> |                  |
| Formula weight                    | 337.36                                           |                  |
| Temperature                       | 293(2) K                                         |                  |
| Wavelength                        | 0.71073 Å                                        |                  |
| Crystal system                    | Monoclinic                                       |                  |
| Space group                       | P 2 <sub>1</sub> /n                              |                  |
| Unit cell dimensions              | a = 11.0608(10) Å                                | α = 90 °         |
|                                   | b = 16.1061(16) Å                                | β = 101.078(2) ° |
|                                   | c = 19.4870(19) Å                                | γ = 90 °         |
| Volume                            | 3406.9(6) Å <sup>3</sup>                         |                  |
| Z                                 | 8                                                |                  |
| Density (calculated)              | 1.315 Mg/m <sup>3</sup>                          |                  |
| Absorption coefficient            | 0.092 mm <sup>-1</sup>                           |                  |
| F(000)                            | 1424                                             |                  |
| Crystal size                      | 0.189 x 0.176 x 0.123 mm <sup>3</sup>            |                  |
| Theta range for data collection   | 1.971 to 25.496 °                                |                  |
| Index ranges                      | -13 ≤ h ≤ 13, -19 ≤ k ≤ 19, -23 ≤ l ≤ 18         |                  |
| Reflections collected             | 19593                                            |                  |
| Independent reflections           | 6358 [R(int) = 0.0421]                           |                  |
| Completeness to theta = 25.242 °  | 100.0 %                                          |                  |
| Absorption correction             | Semi-empirical from equivalents                  |                  |
| Max. and min. transmission        | 0.7456 and 0.6495                                |                  |
| Refinement method                 | Full-matrix least-squares on F <sup>2</sup>      |                  |
| Data / restraints / parameters    | 6358 / 0 / 457                                   |                  |
| Goodness-of-fit on F <sup>2</sup> | 1.038                                            |                  |
| Final R indices [I > 2σ(I)]       | R1 = 0.0593, wR2 = 0.1554                        |                  |
| R indices (all data)              | R1 = 0.0804, wR2 = 0.1721                        |                  |
| Extinction coefficient            | n/a                                              |                  |
| Largest diff. peak and hole       | 0.355 and -0.195 e.Å <sup>-3</sup>               |                  |

## 7. References

- (1) Li, D.; Yang, T.; Su, H.; Yu, W. *Adv. Synth. Catal.* **2015**, 357, 2529 – 2539.
- (2) Mazik, M.; Buthe, A. C. *Org. Biomol. Chem.*, **2008**, 6, 1558–1568.
- (3) Cho, H.; Iwama, Y.; Sugimoto, K.; Mori, S.; Tokuyama, H. *J. Org. Chem.* **2010**, 75, 627–636.
- (4) Boitsov, V. M.; Kostikov, R. R.; Molchanov, A. P.; Stepakov, A. V.; Baird, M. S. *Russ. J. Org. Chem.* **2004**, Vol. 40, 1760-1763.
- (5) Tobisu, M.; Fujihara, H.; Koh, K.; Chatani, N. *J. Org. Chem.*, **2010**, 75, 4841-4847.

## 8. Copies of NMR Spectra of Products

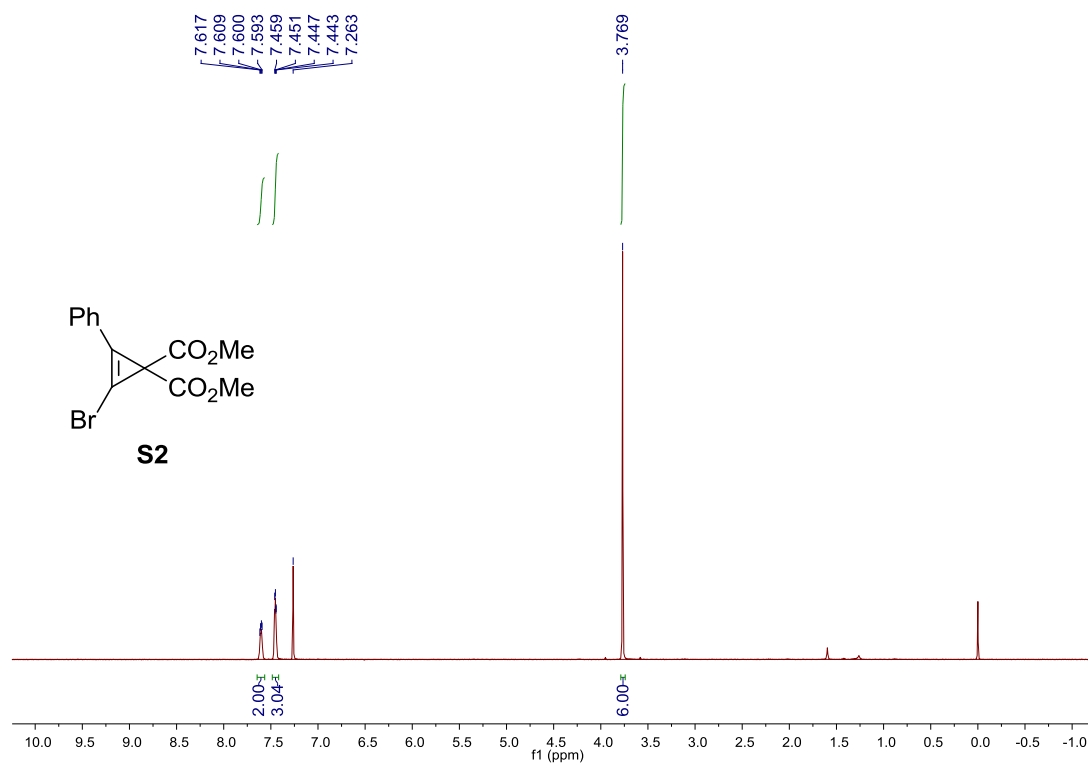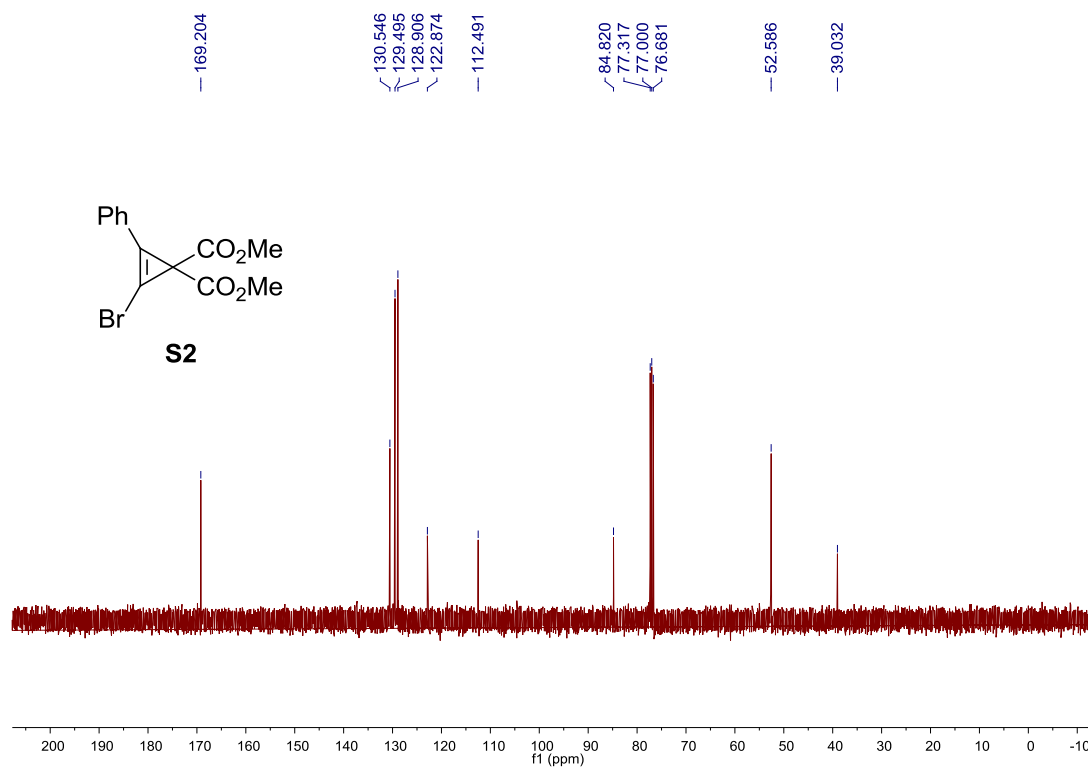

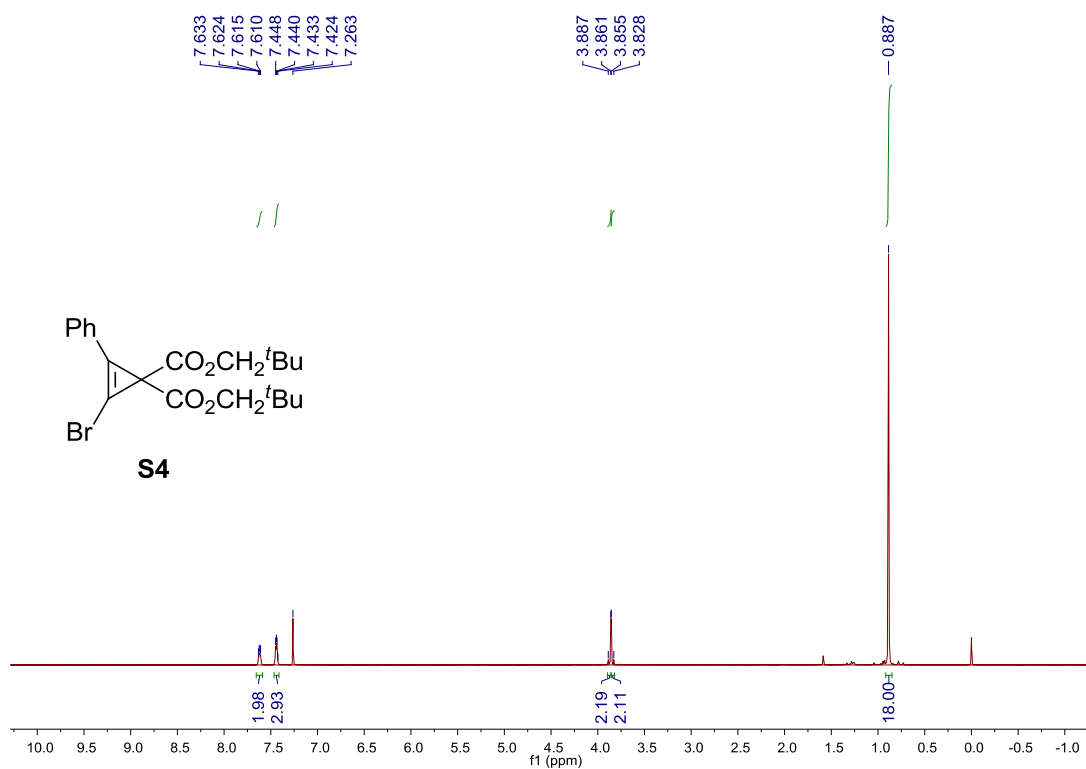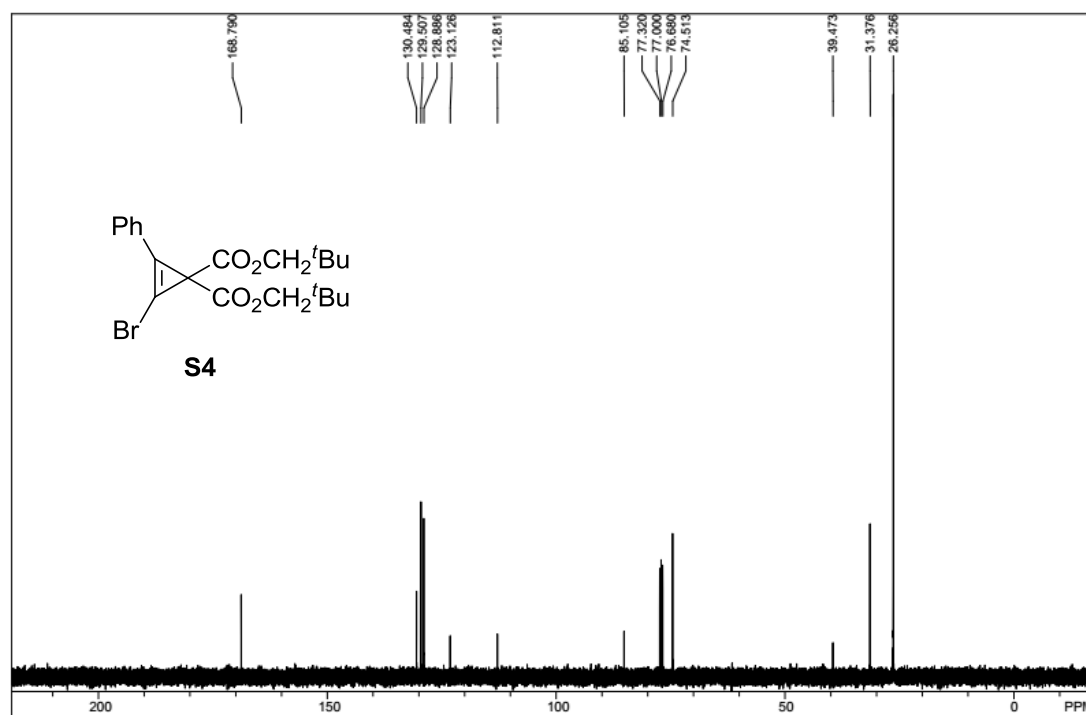

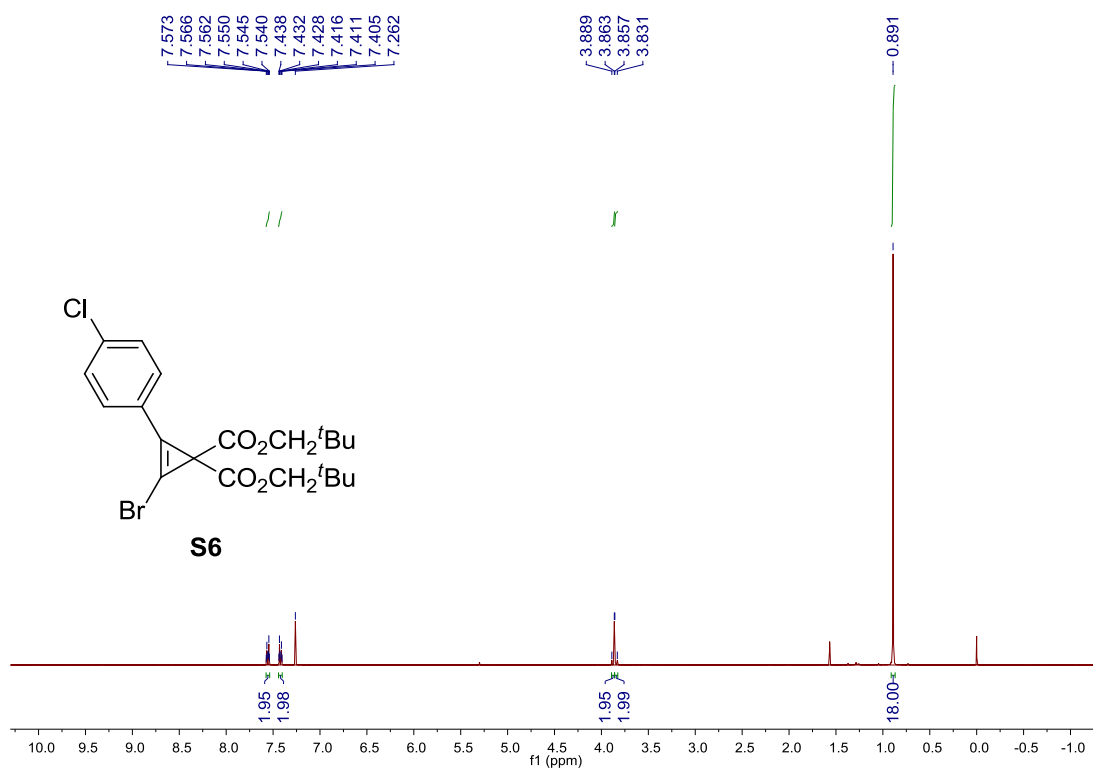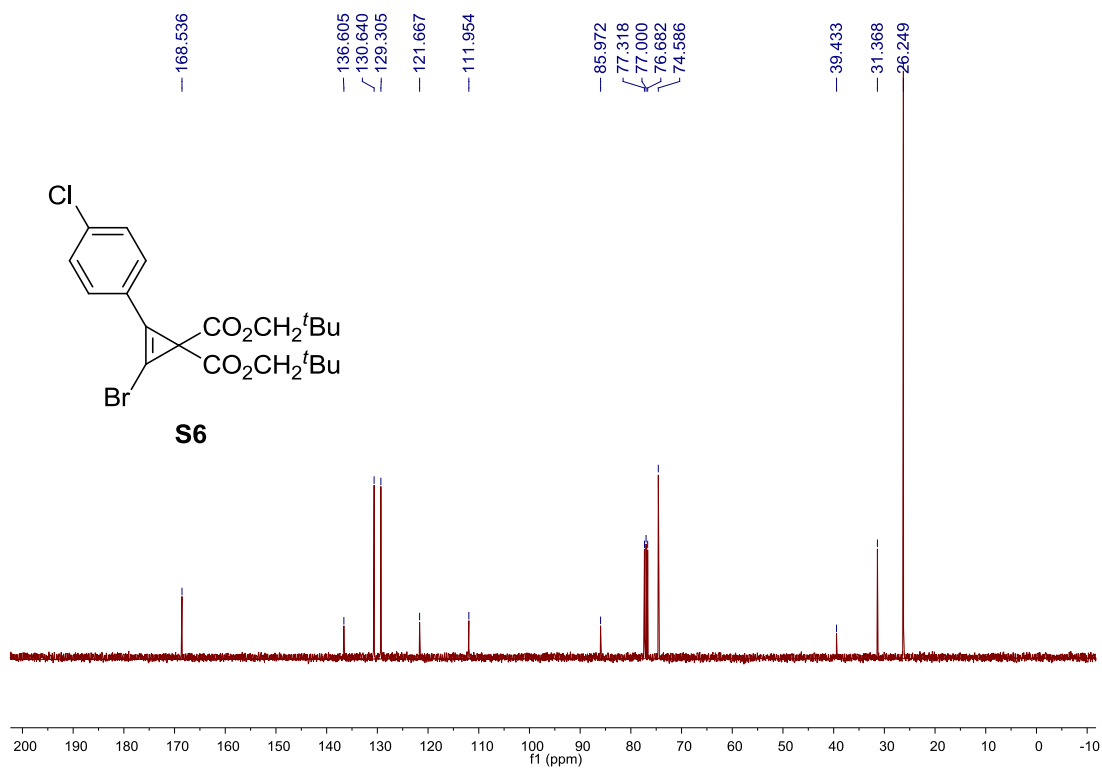

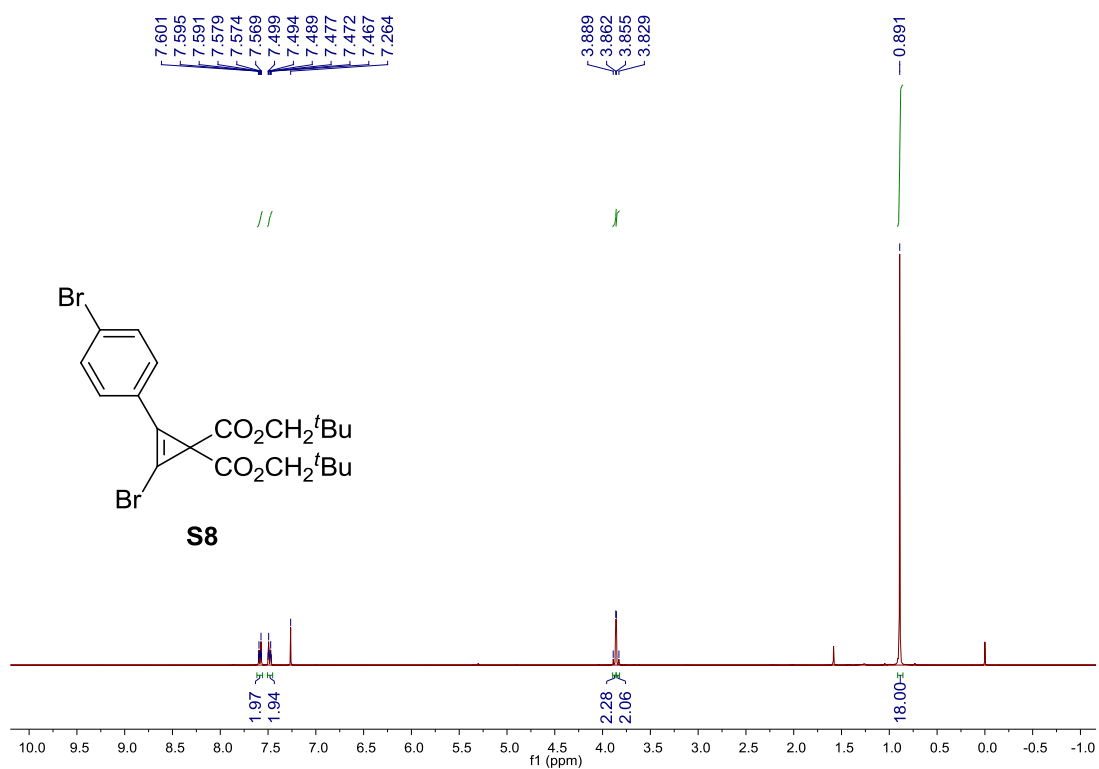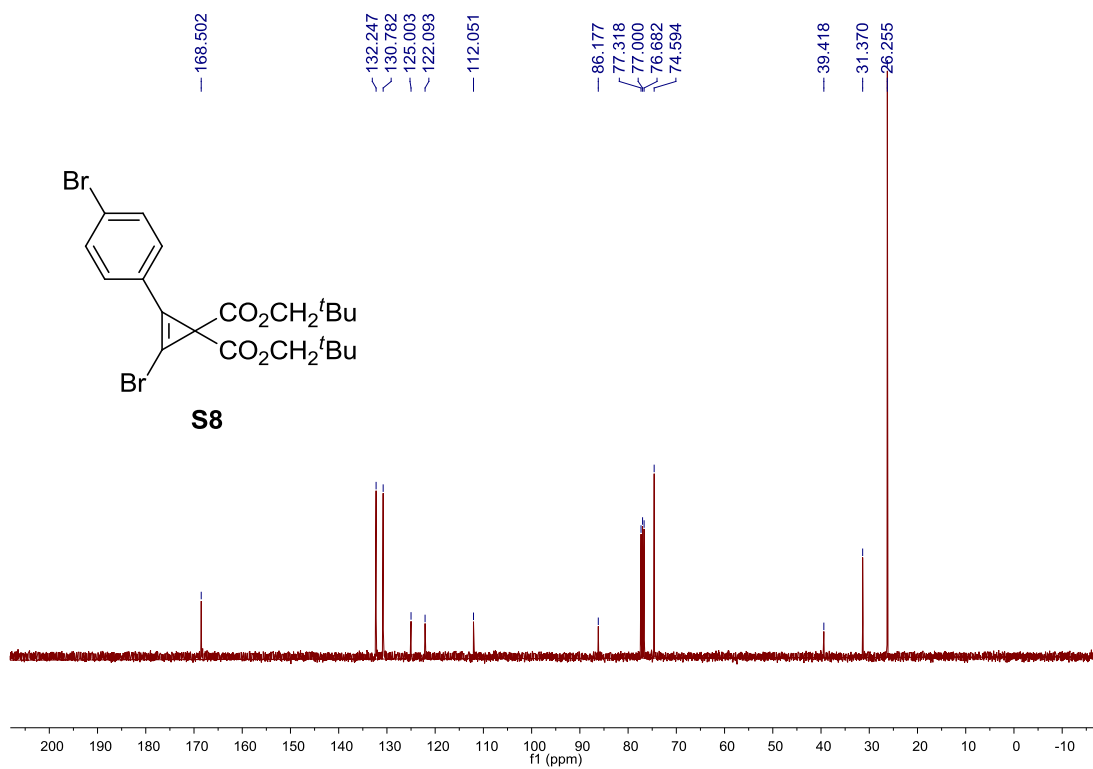

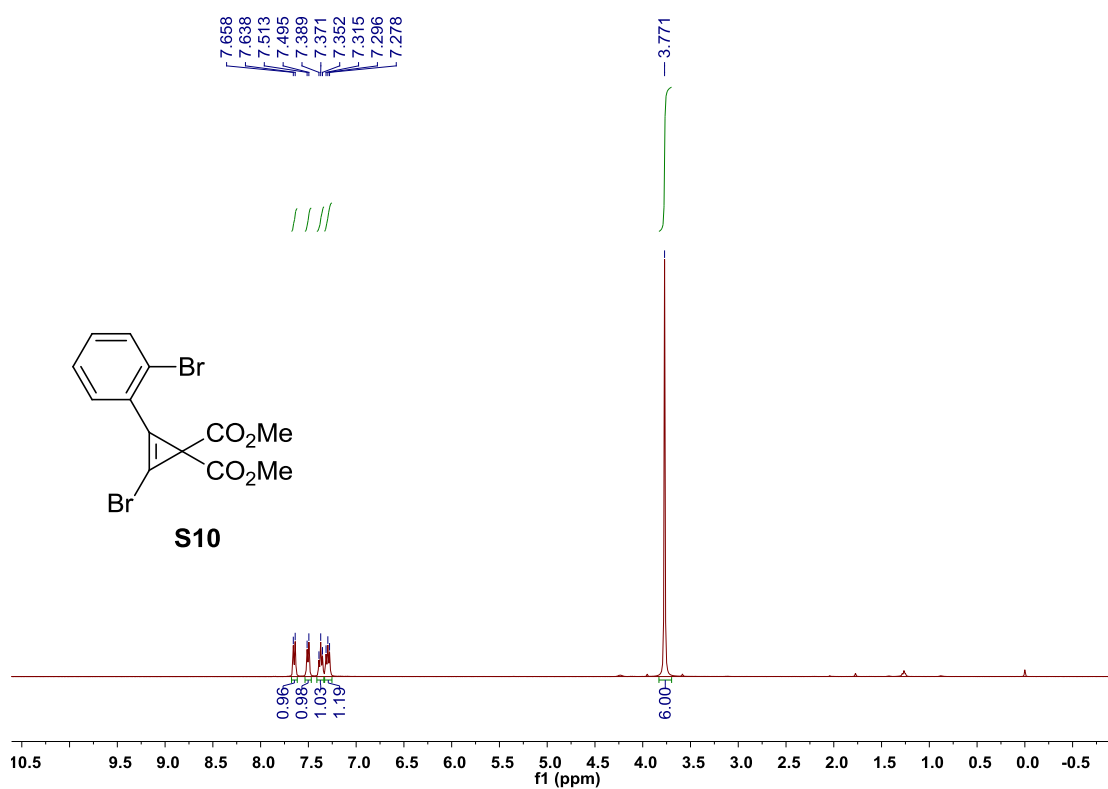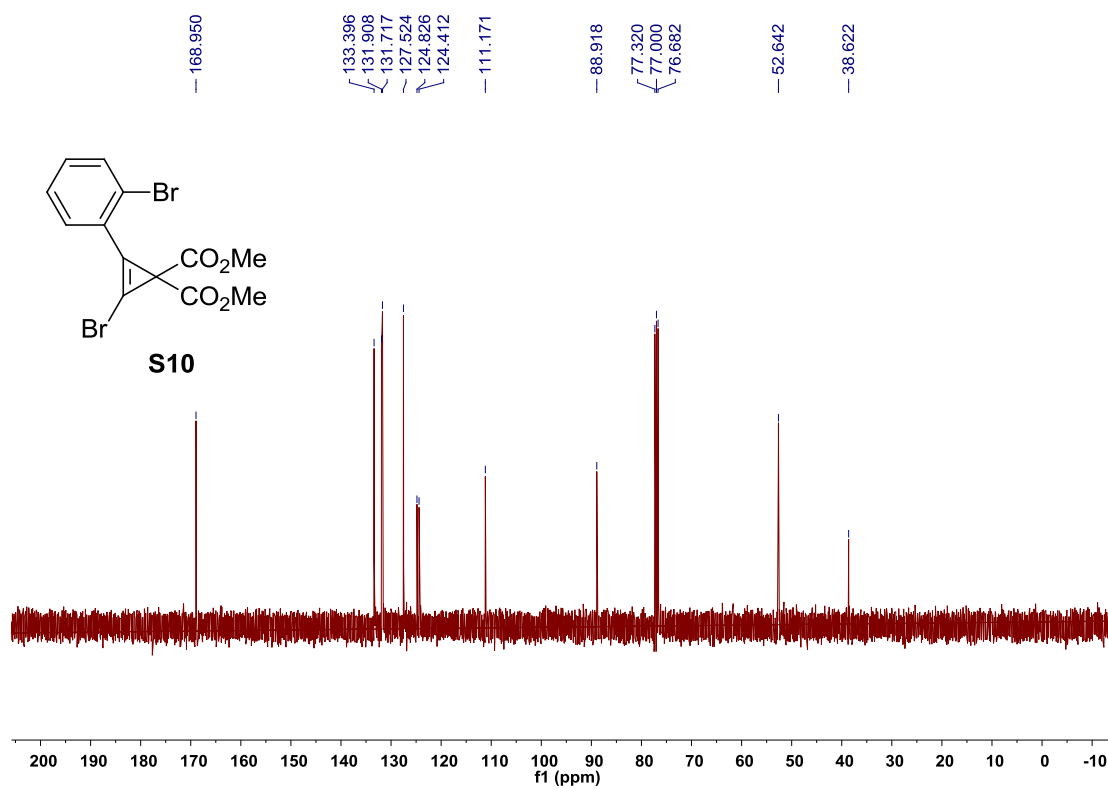



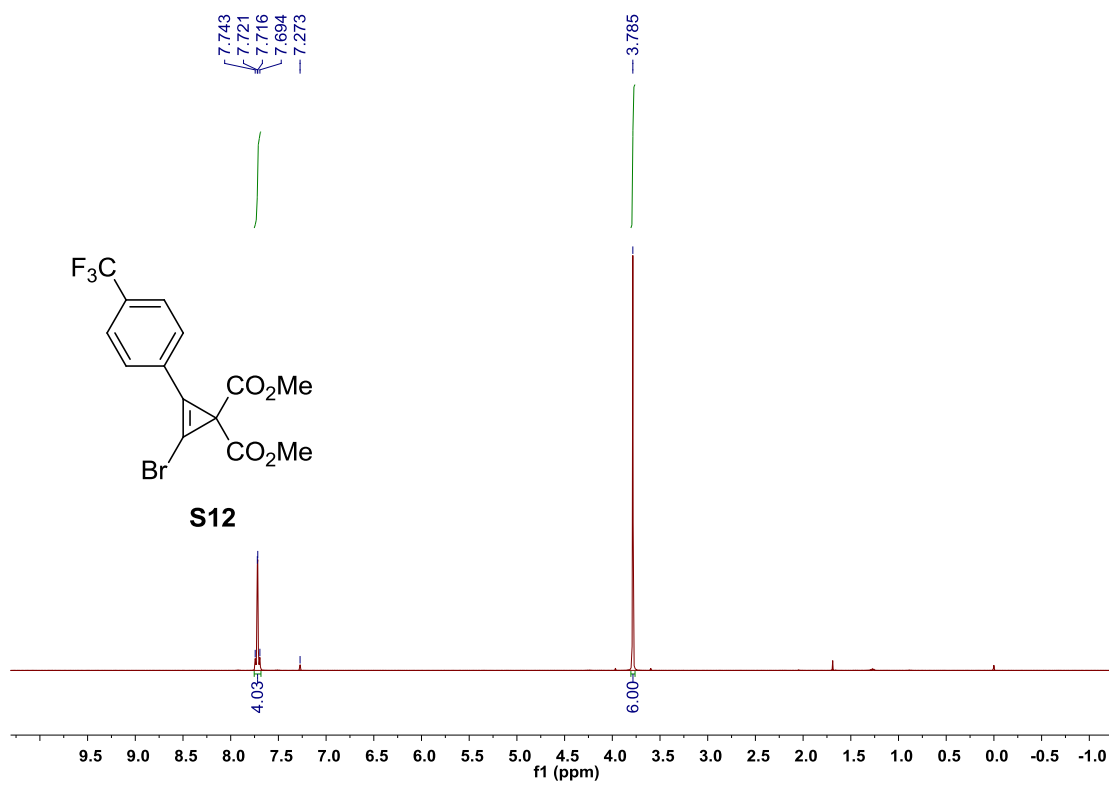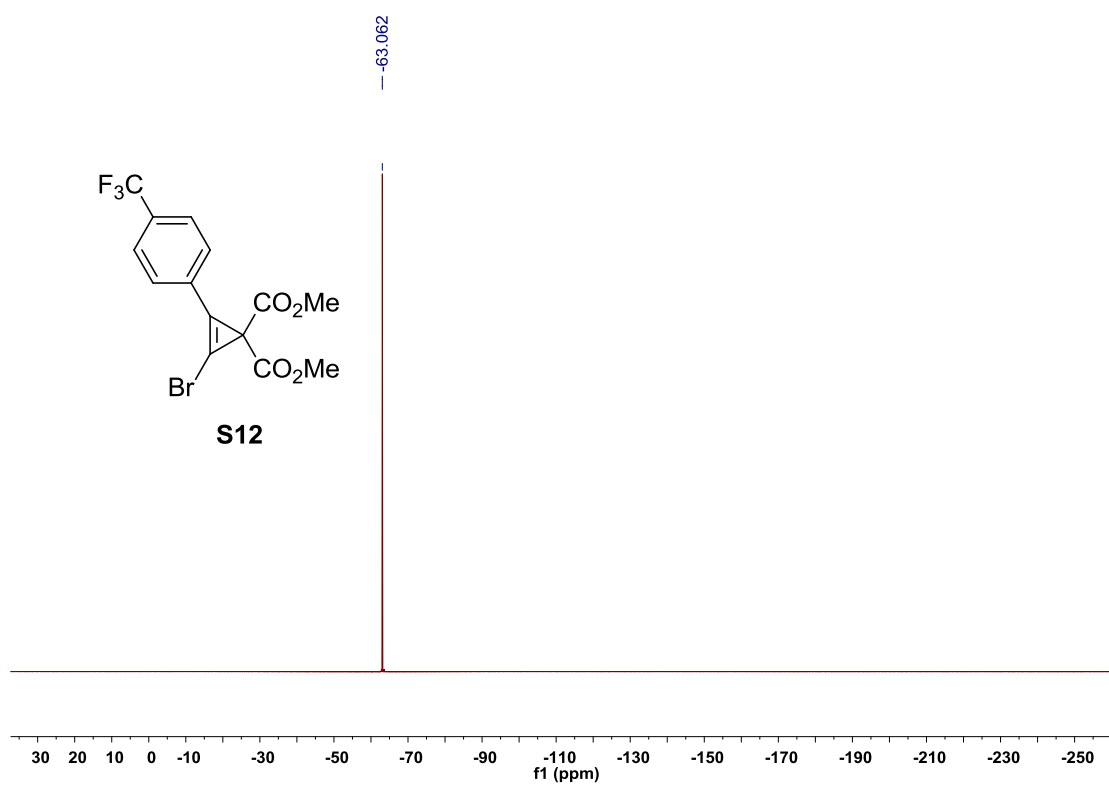

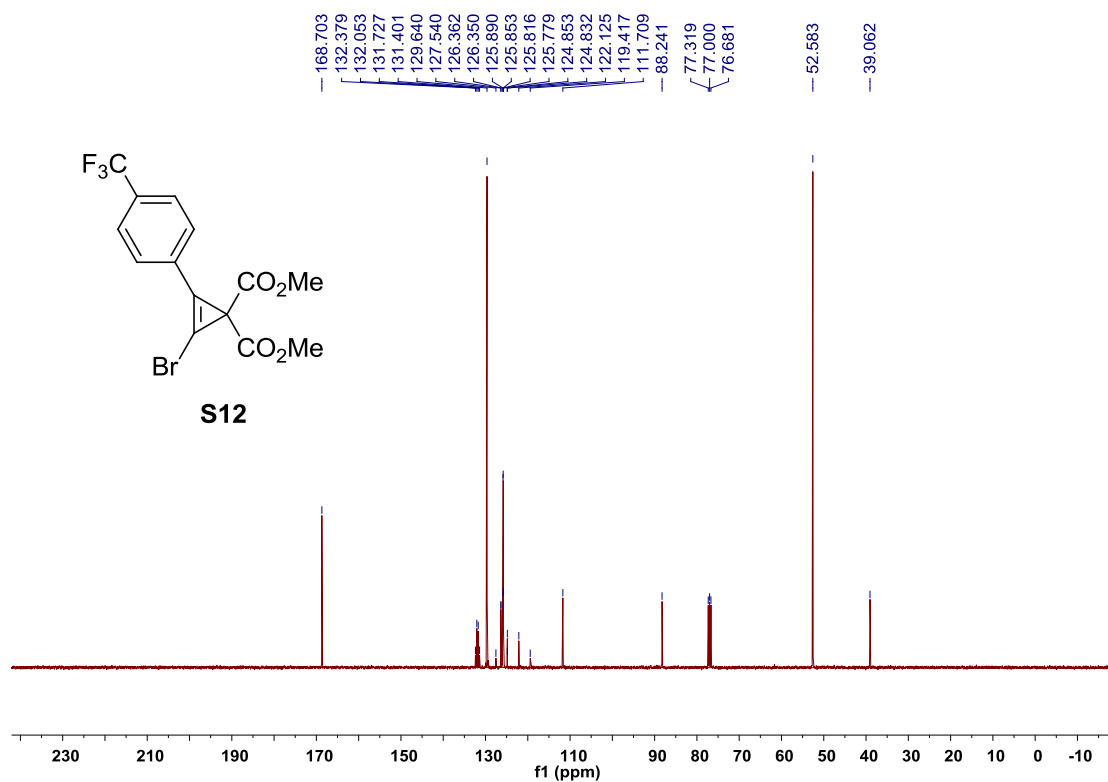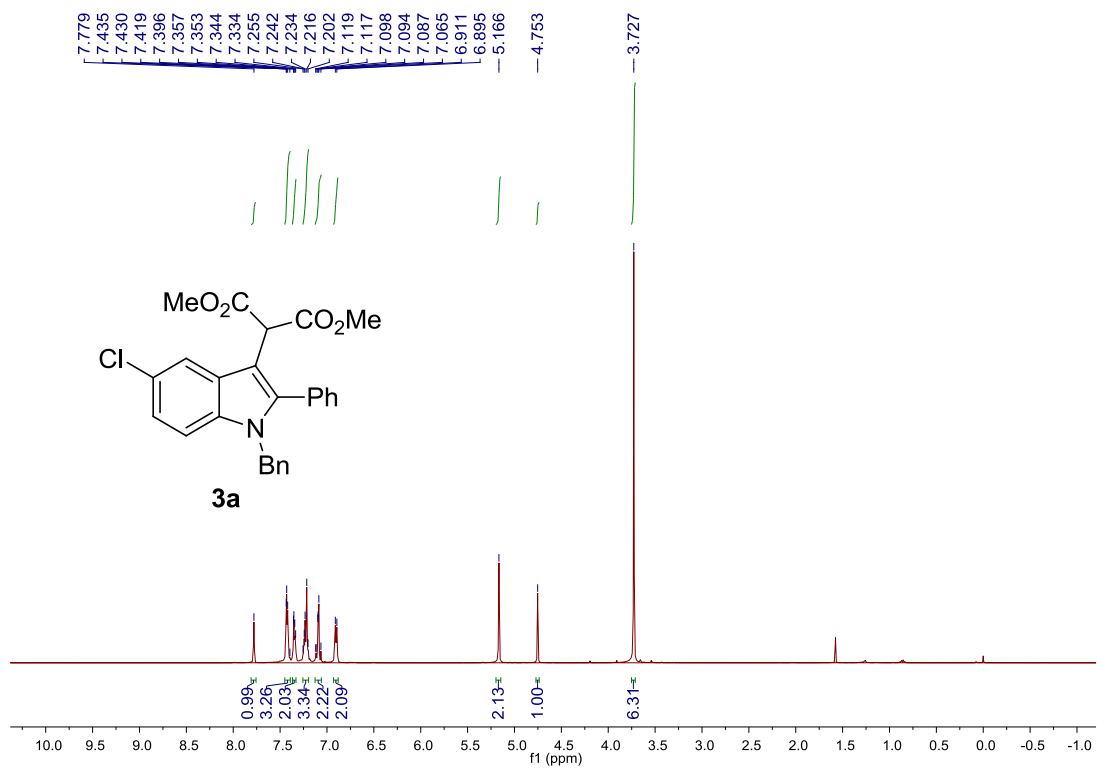

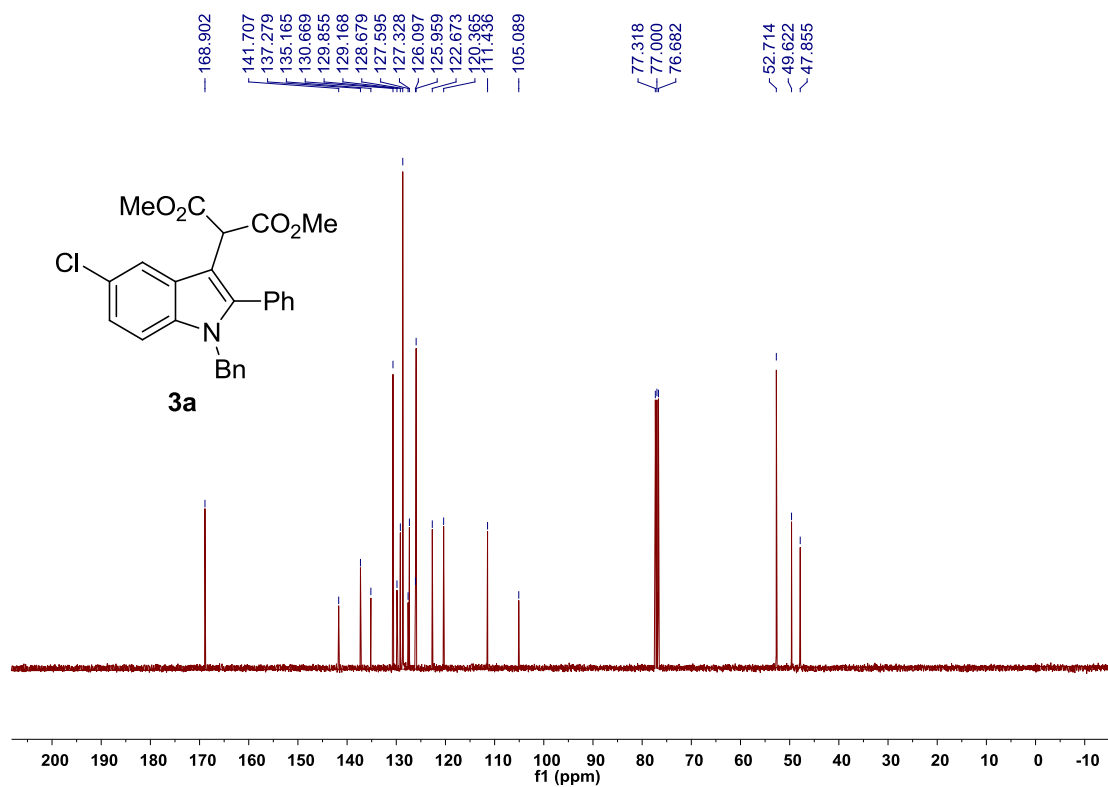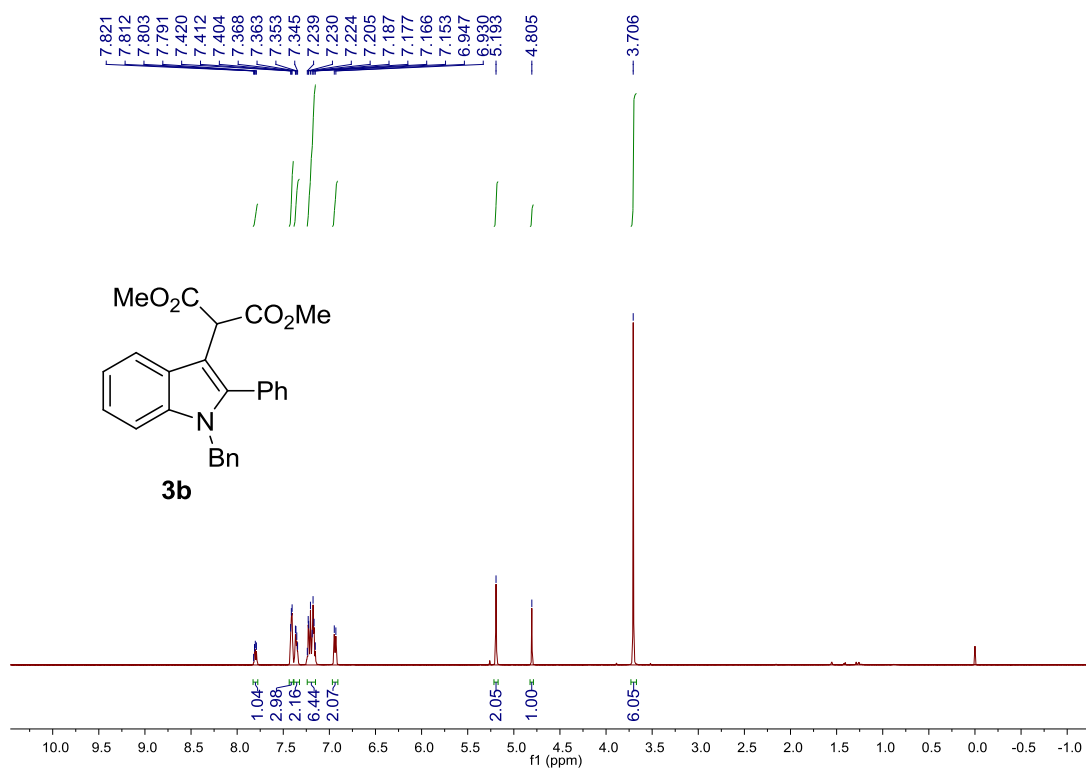

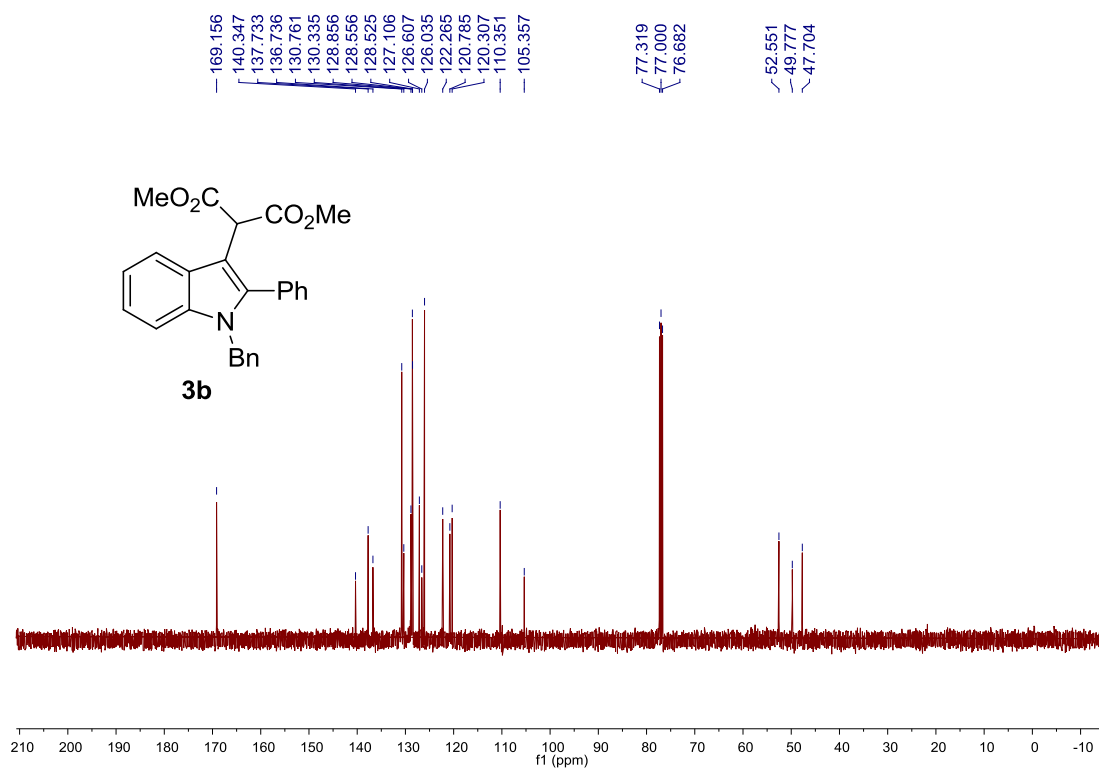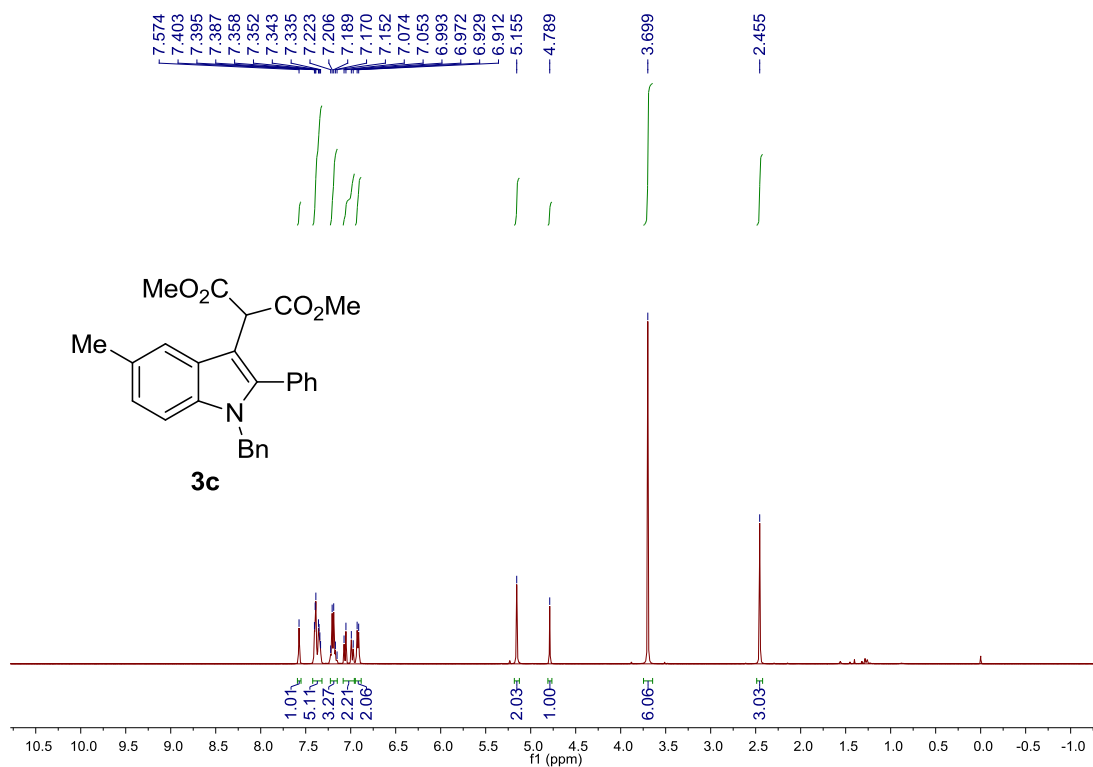

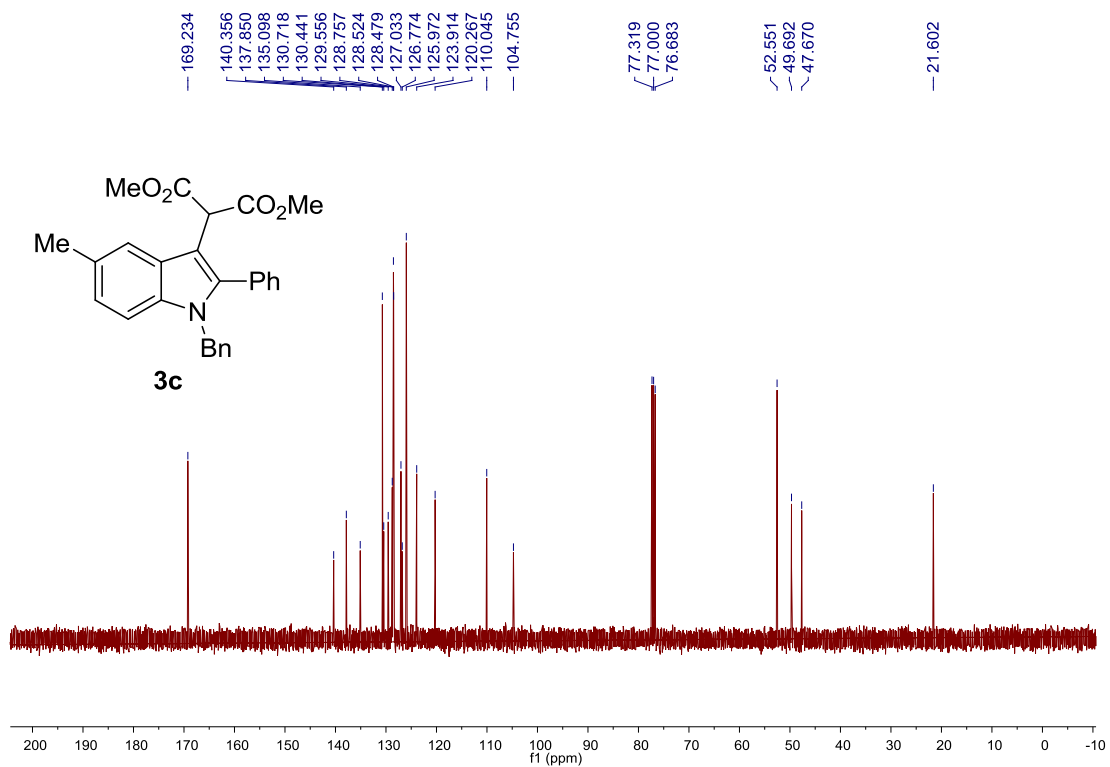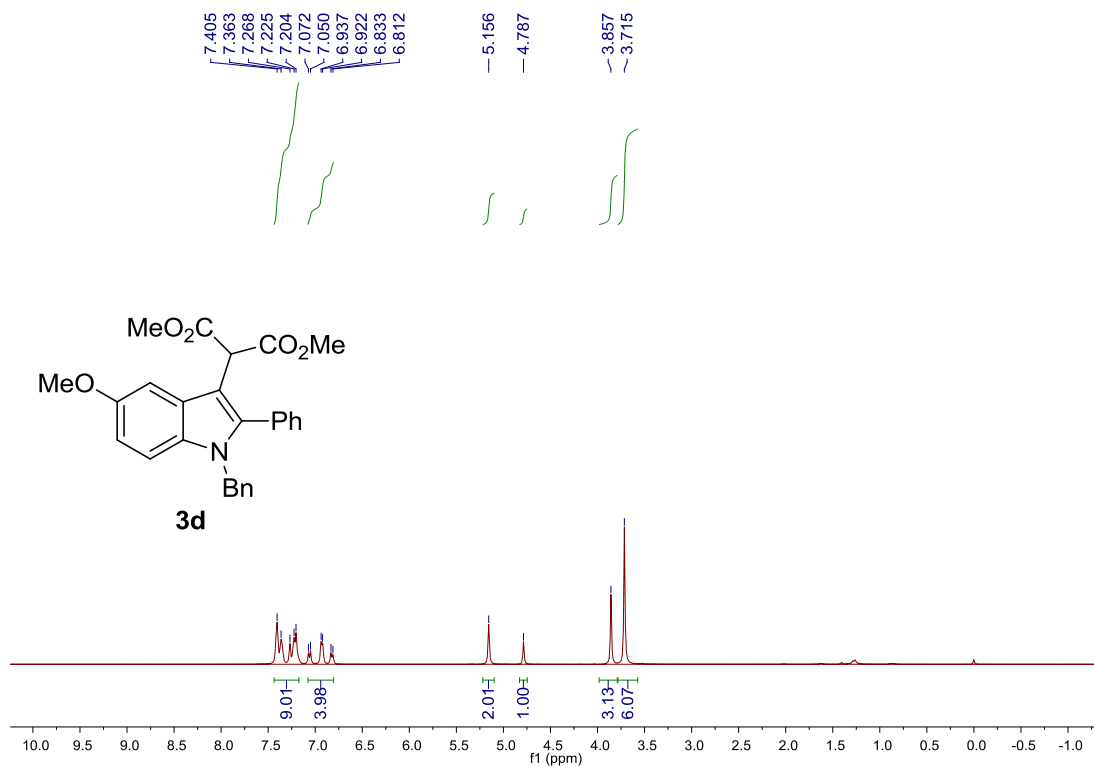

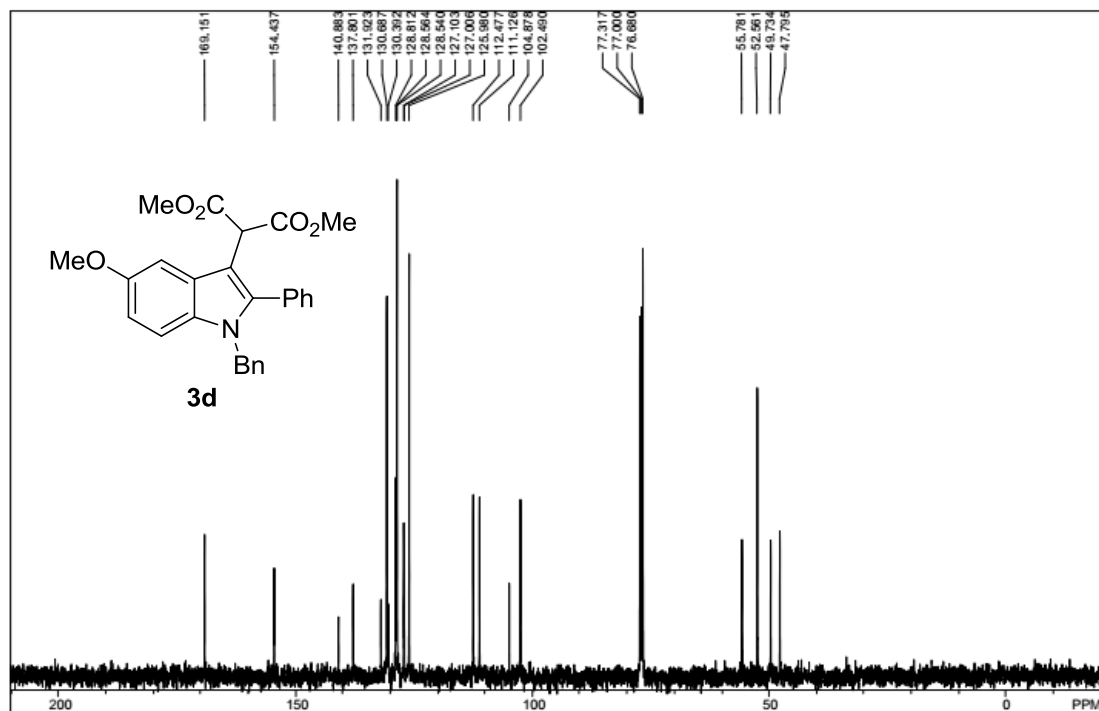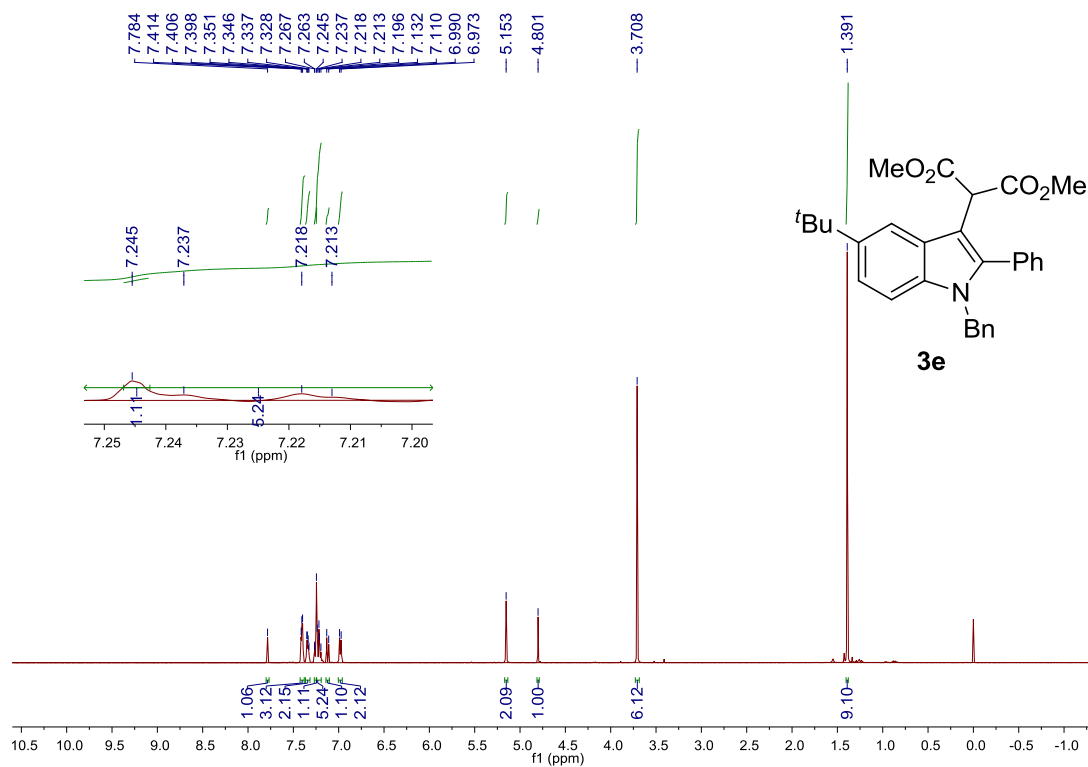

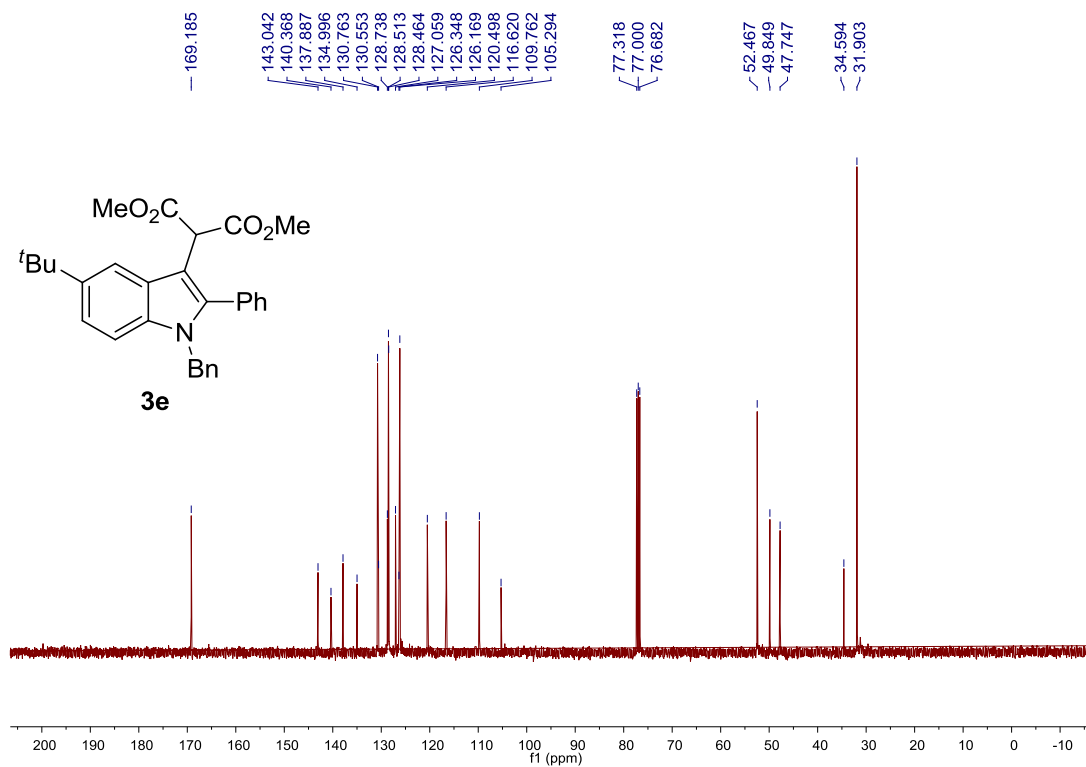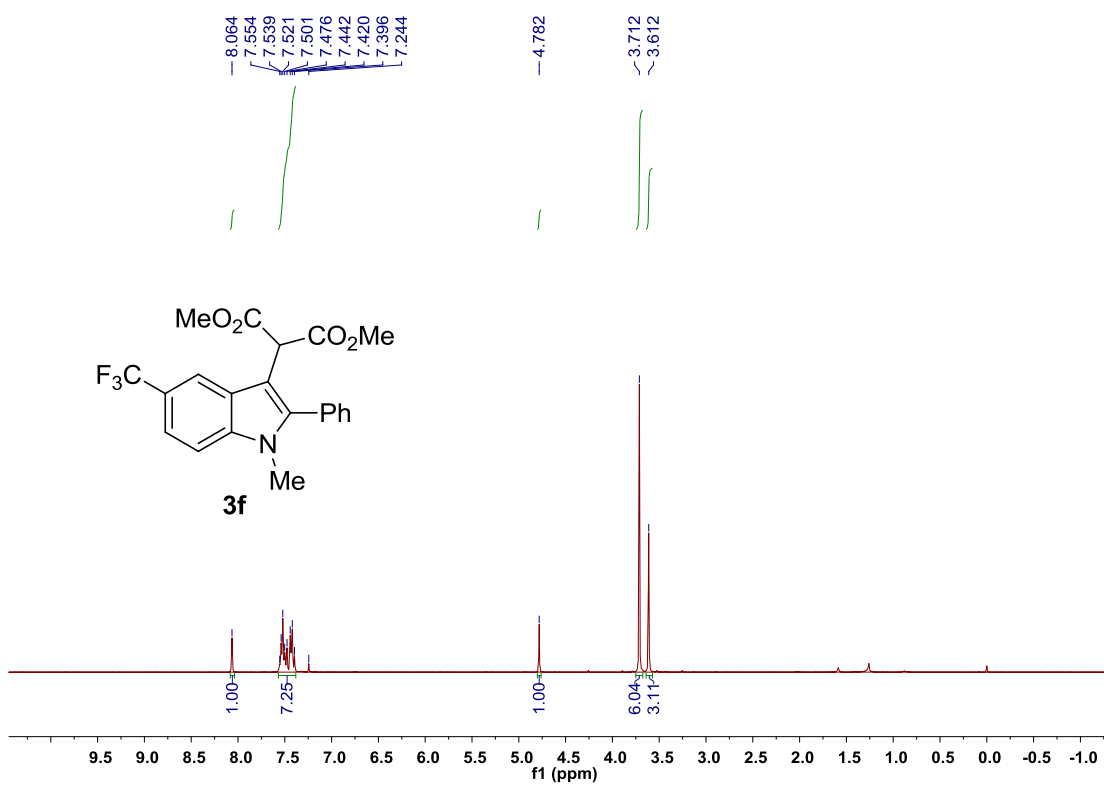

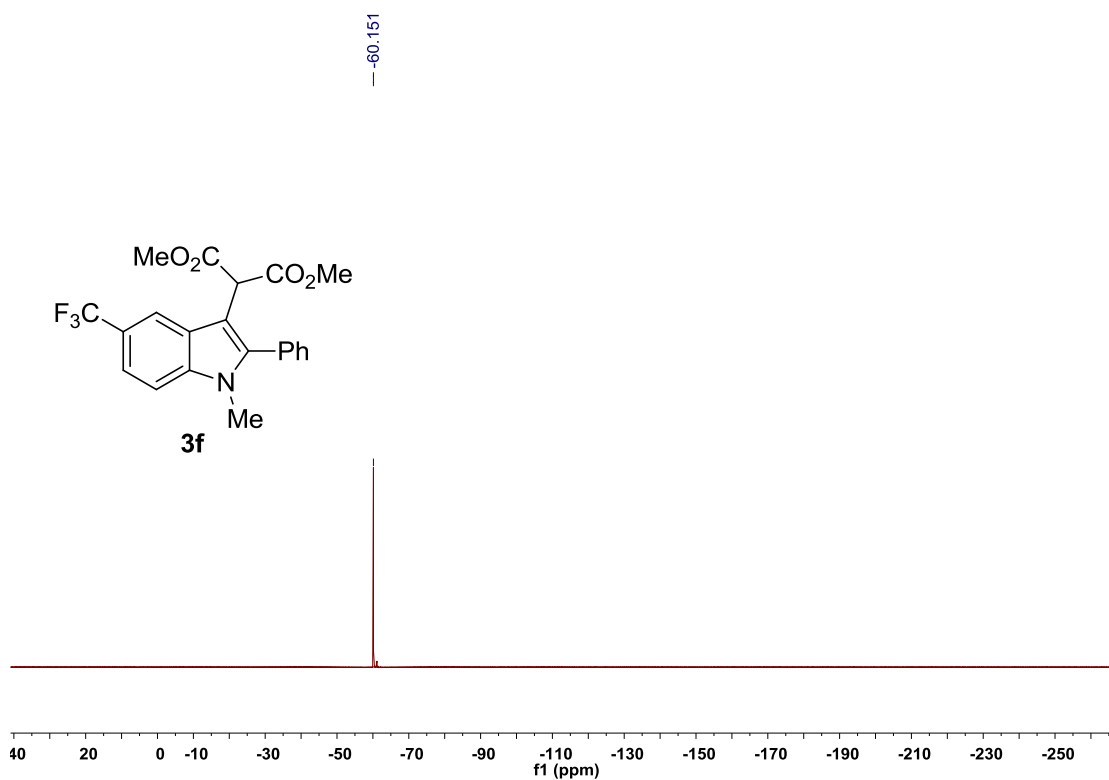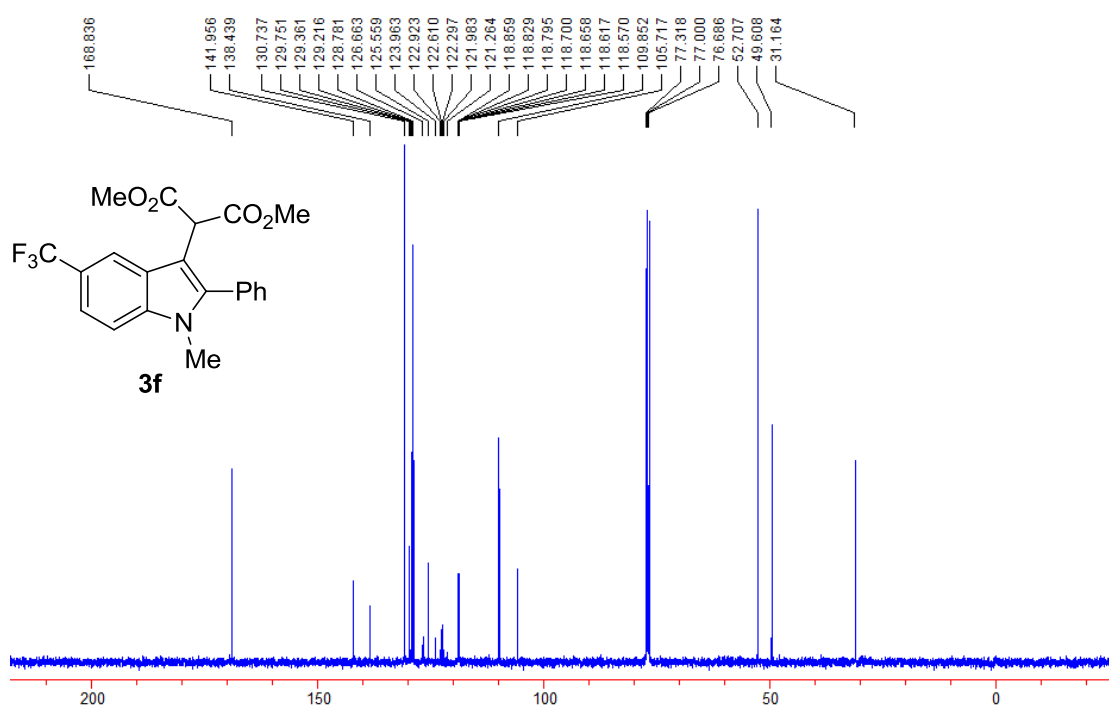



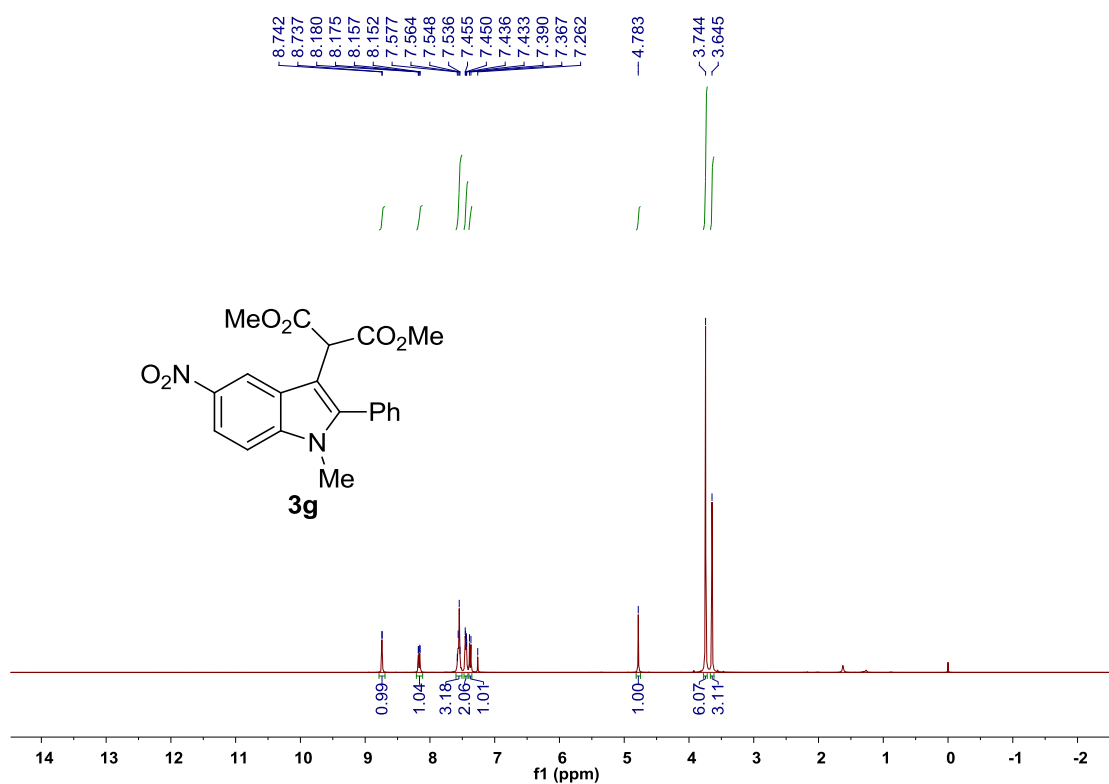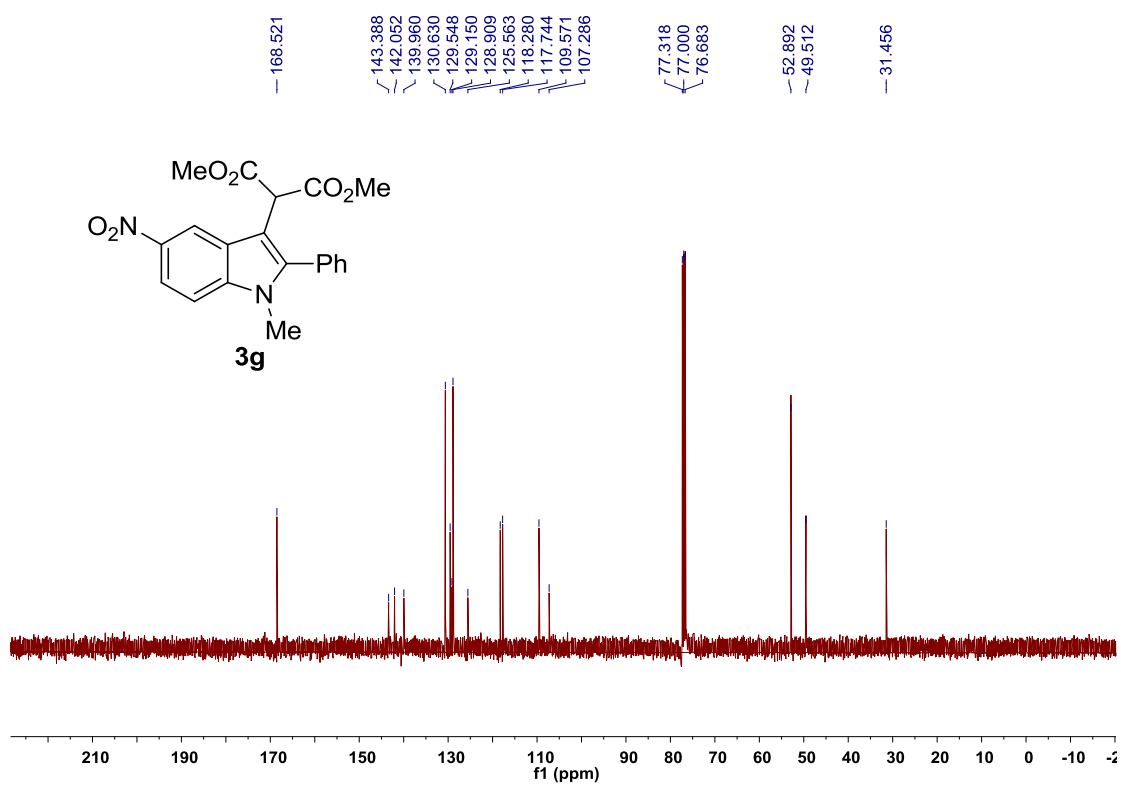

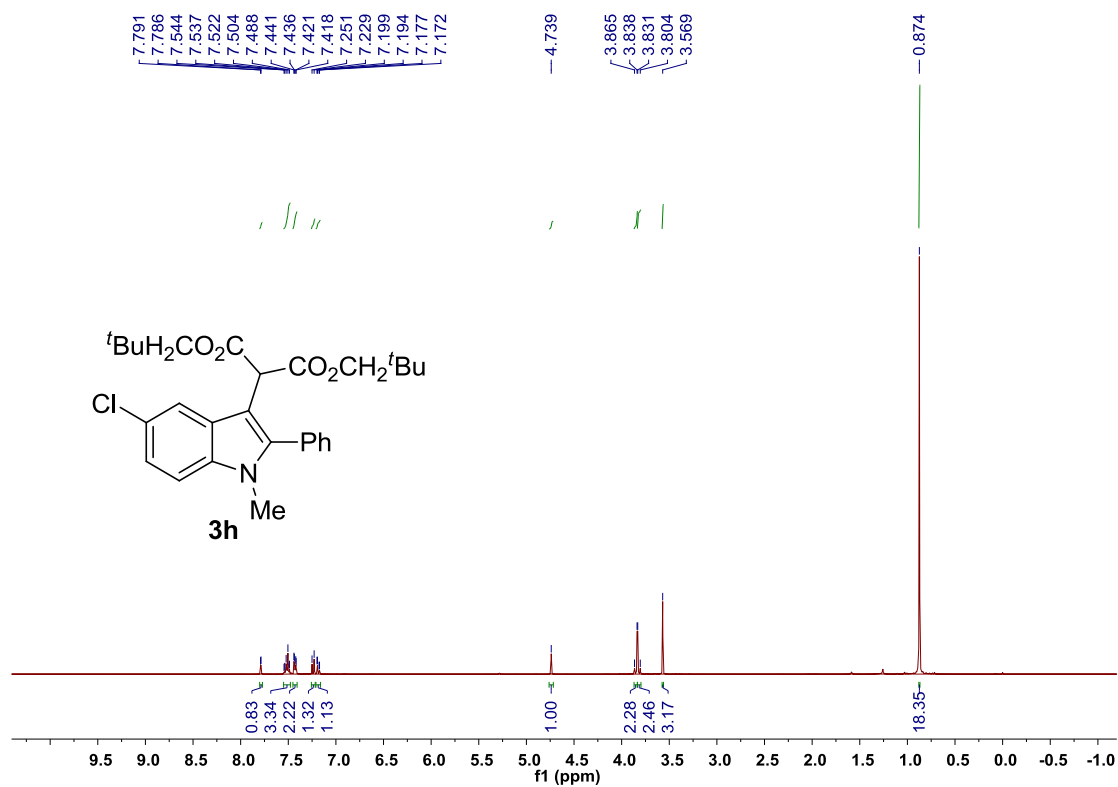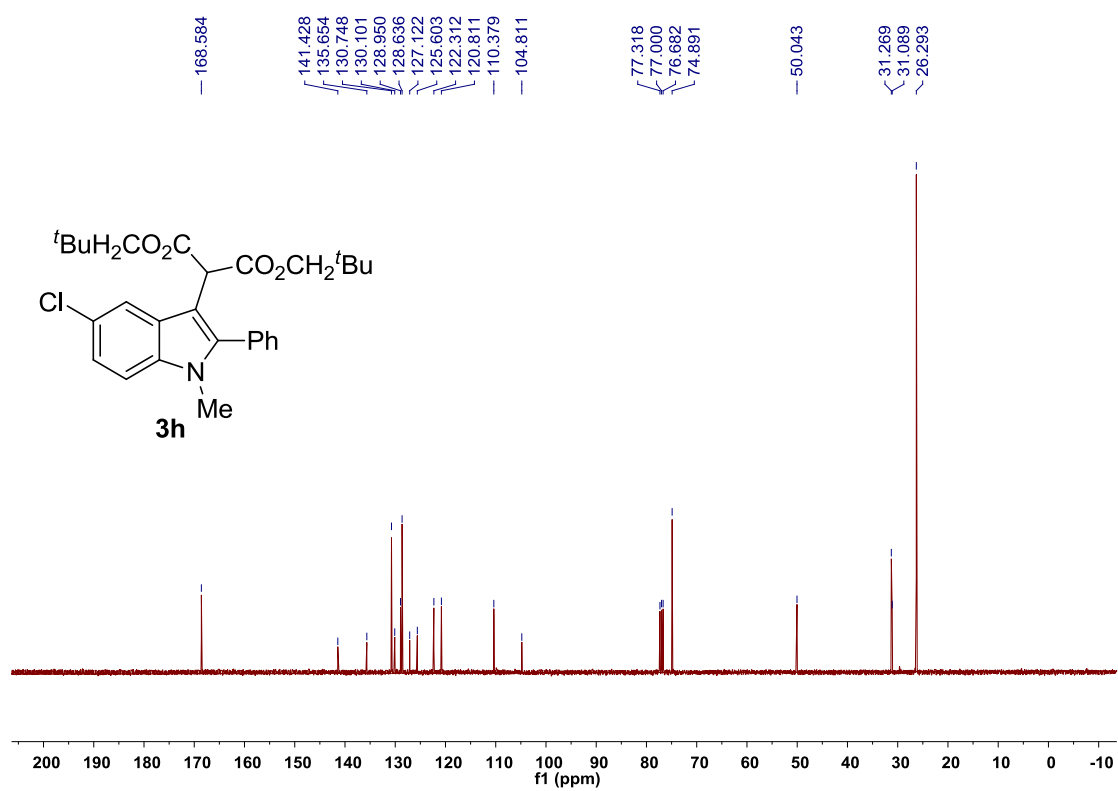

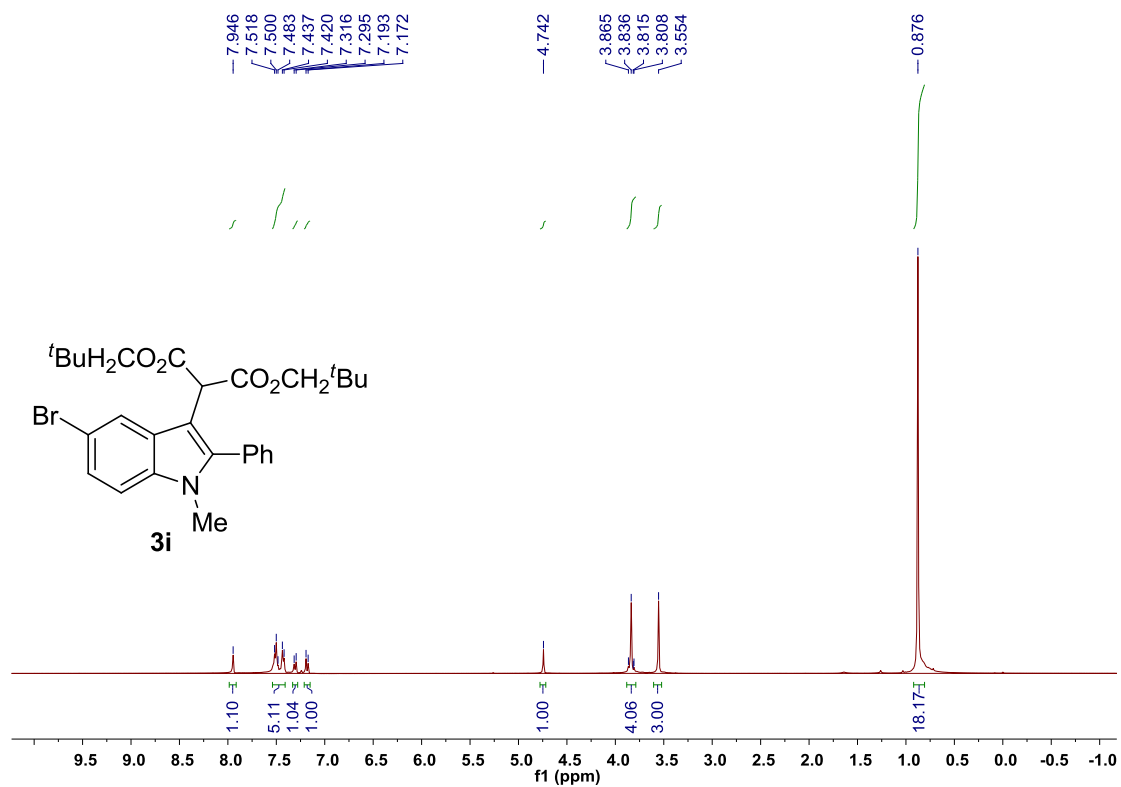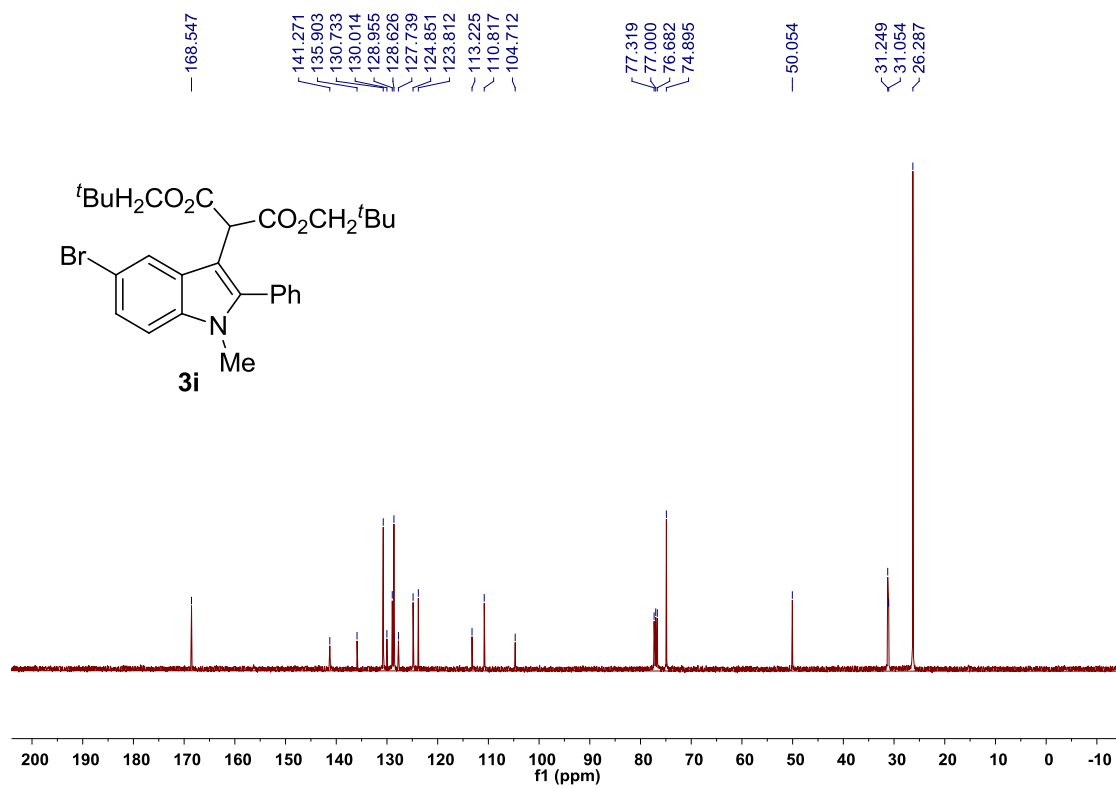

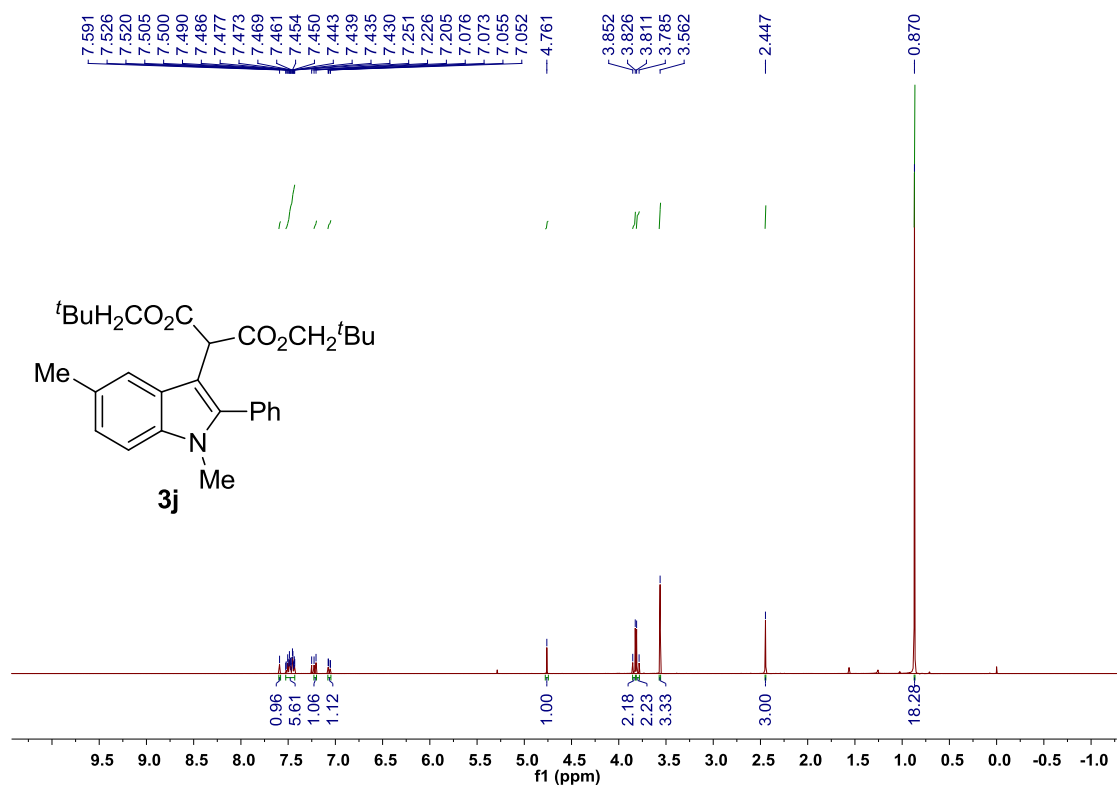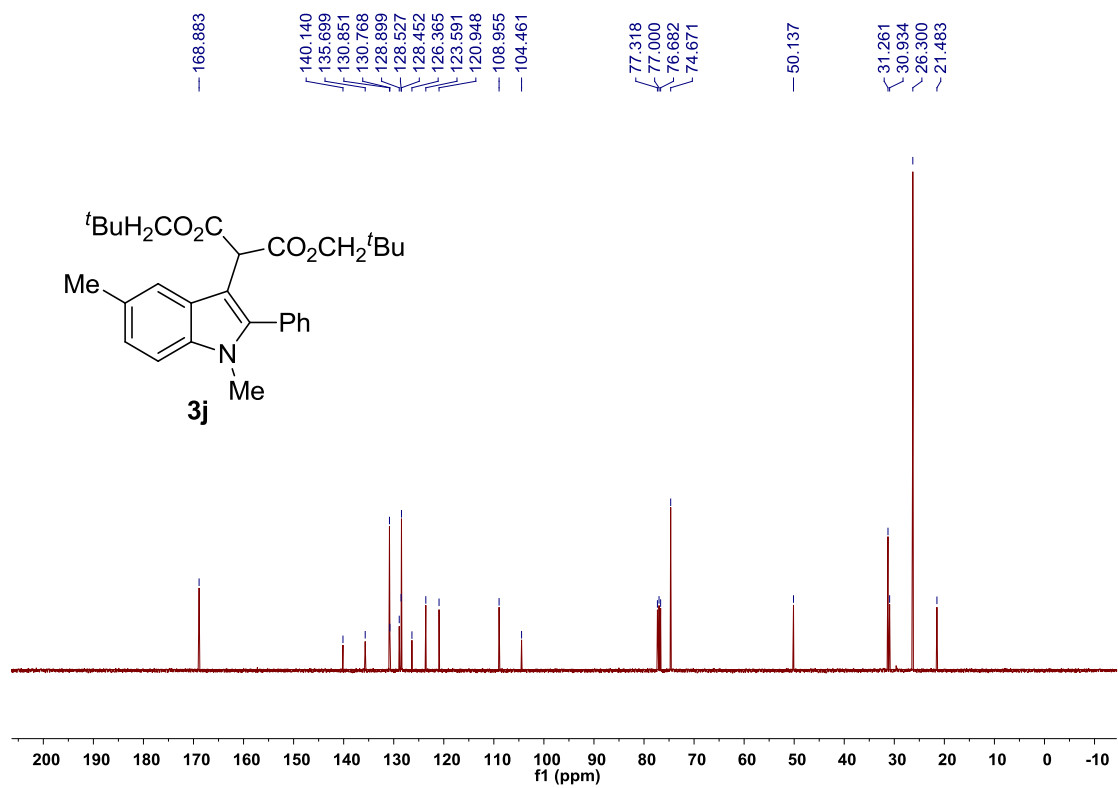

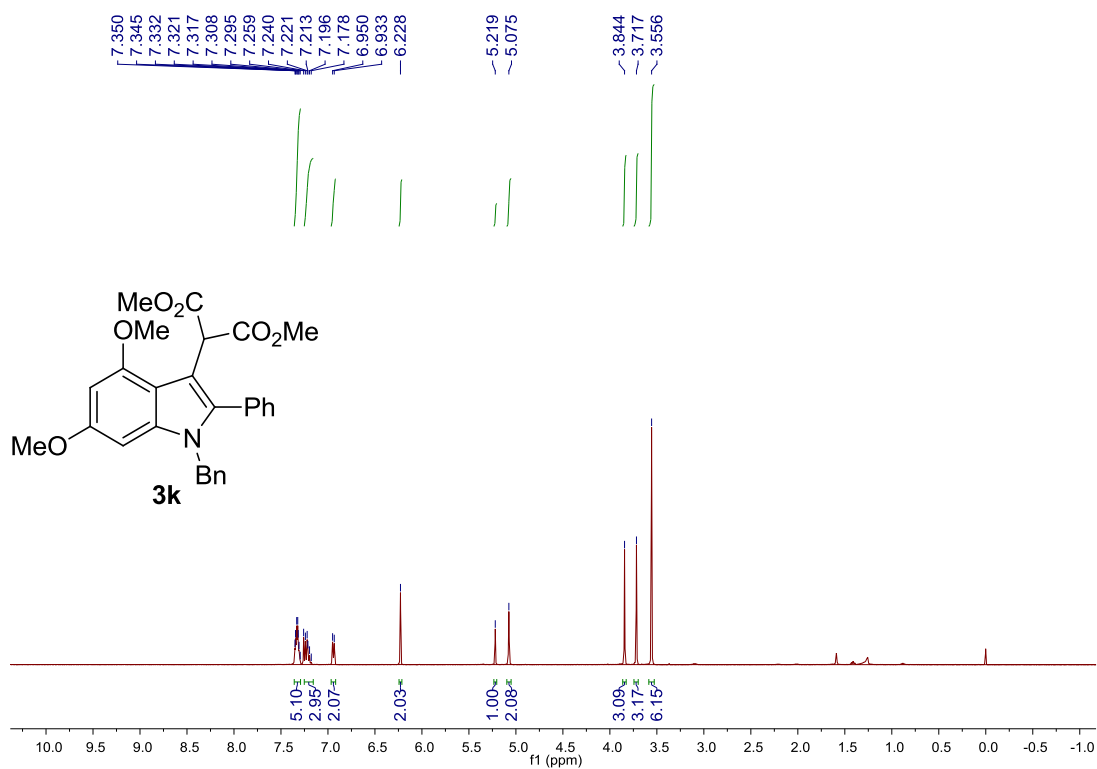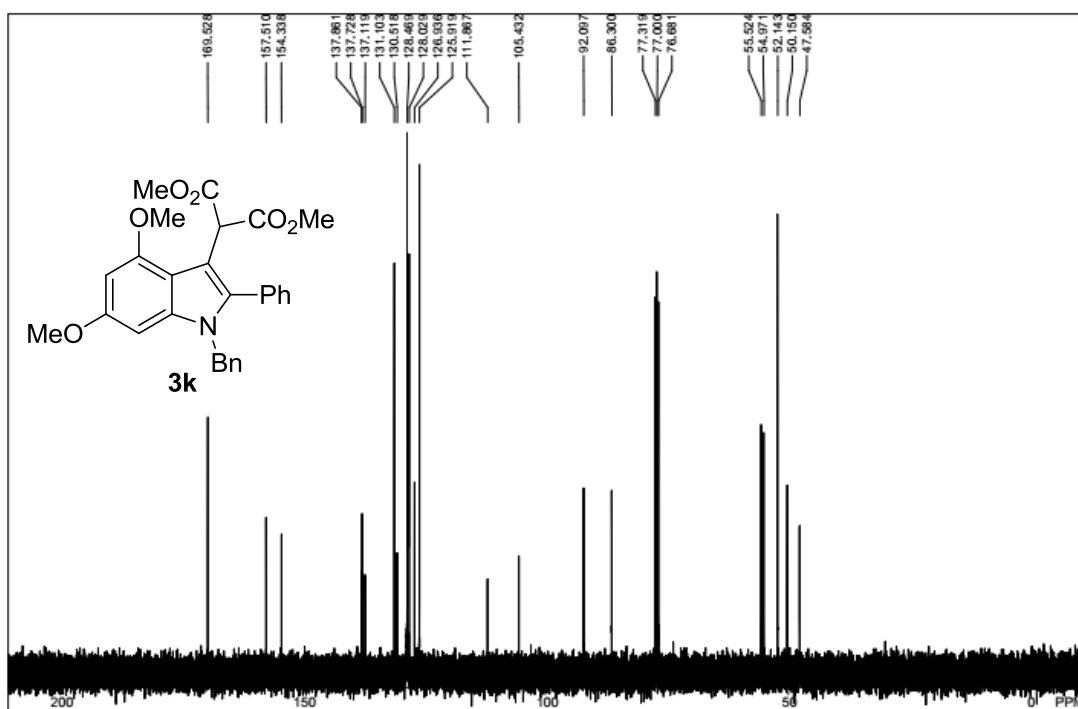

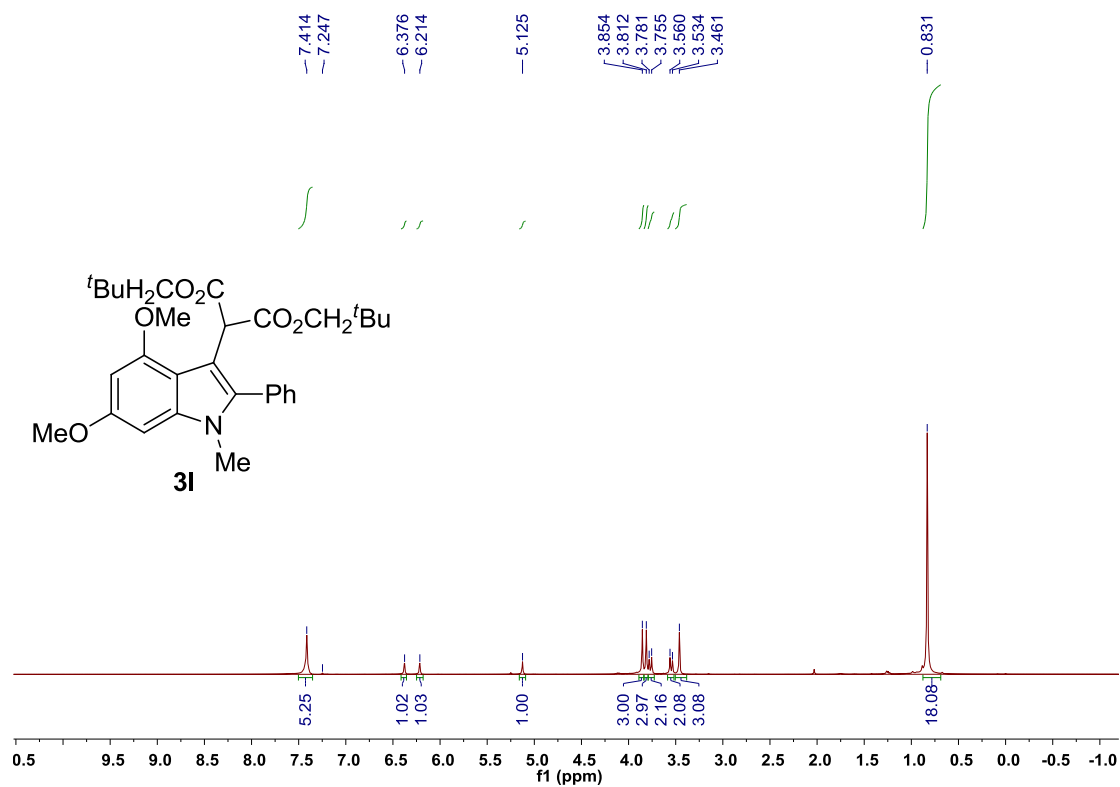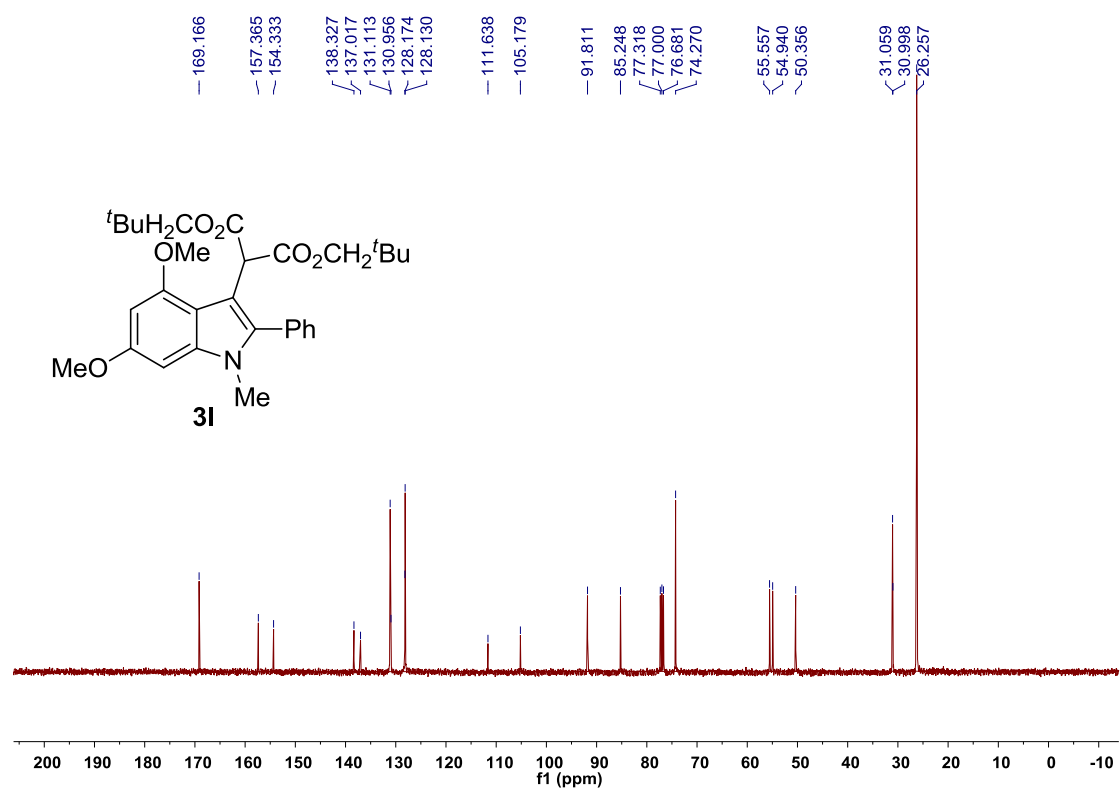

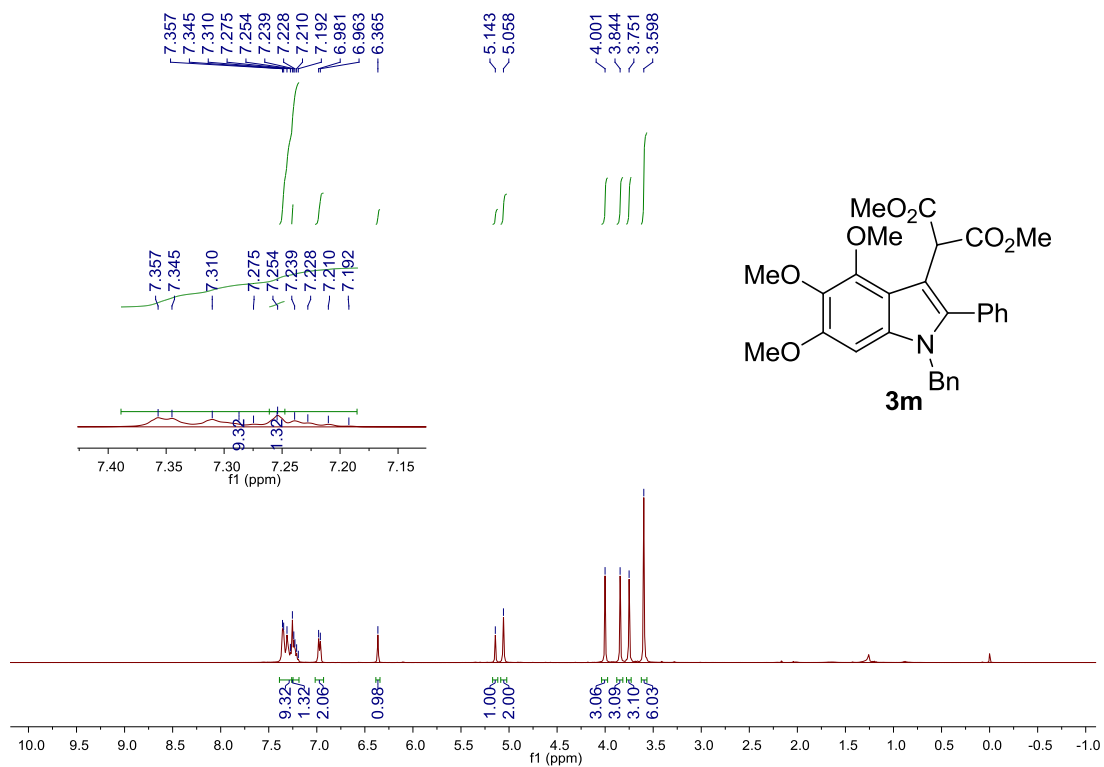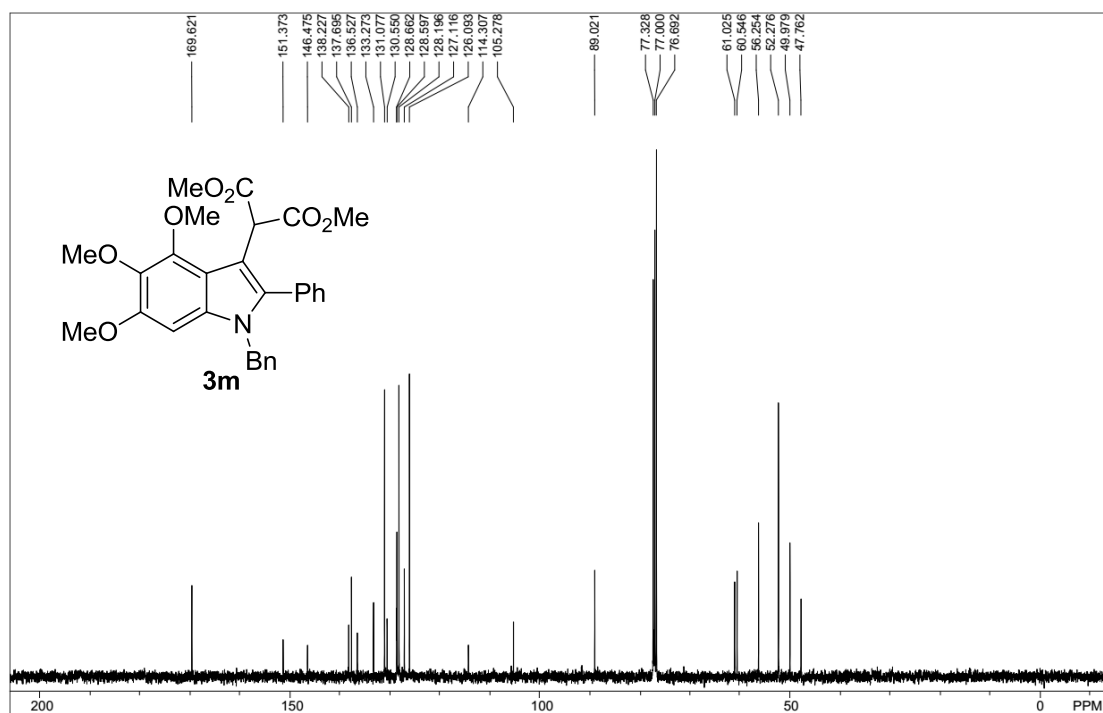

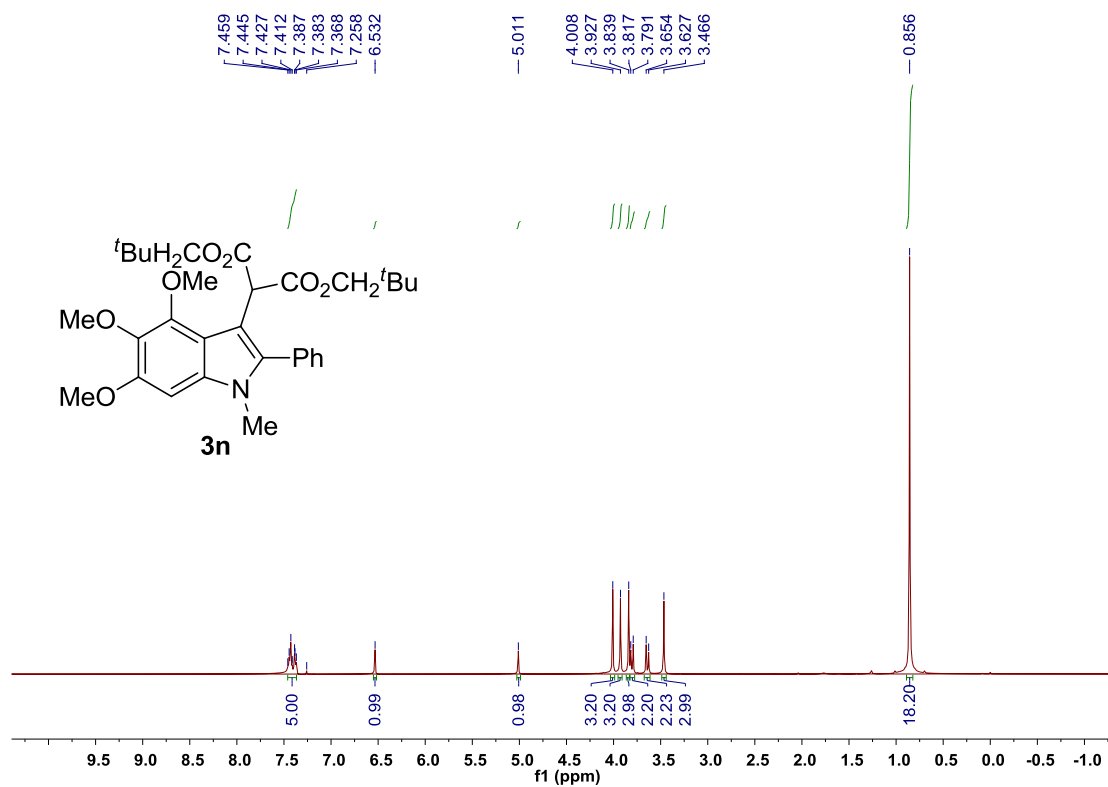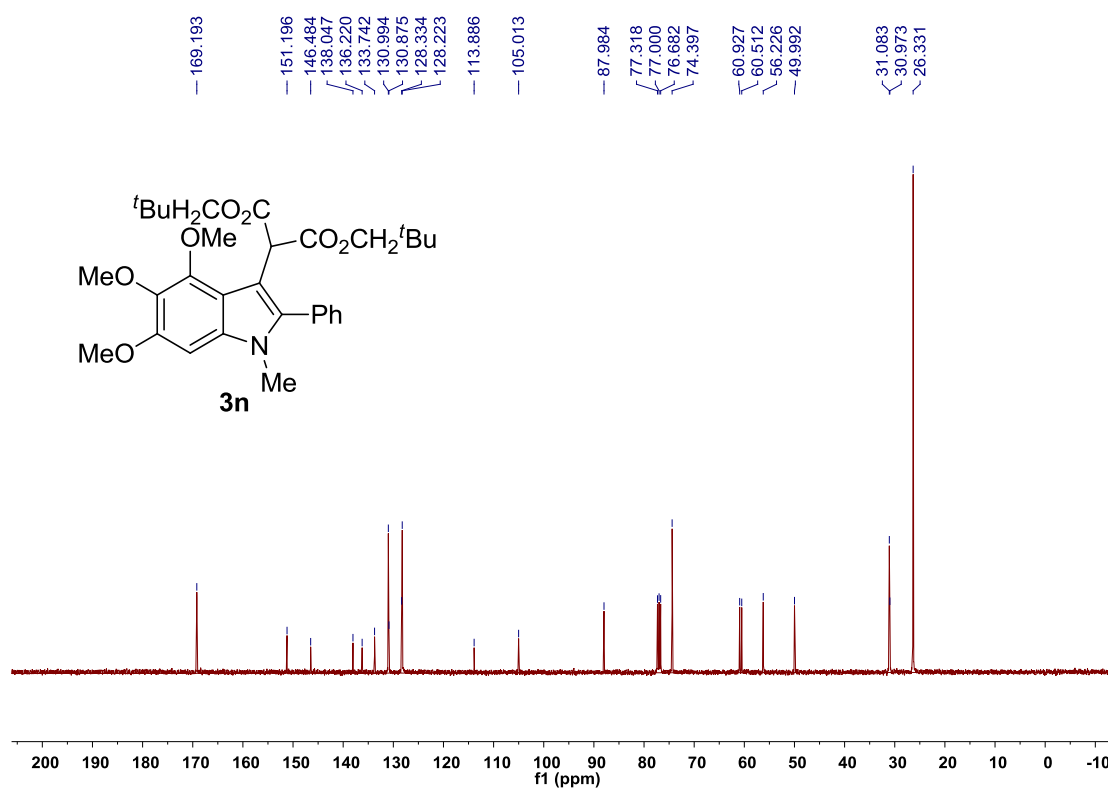



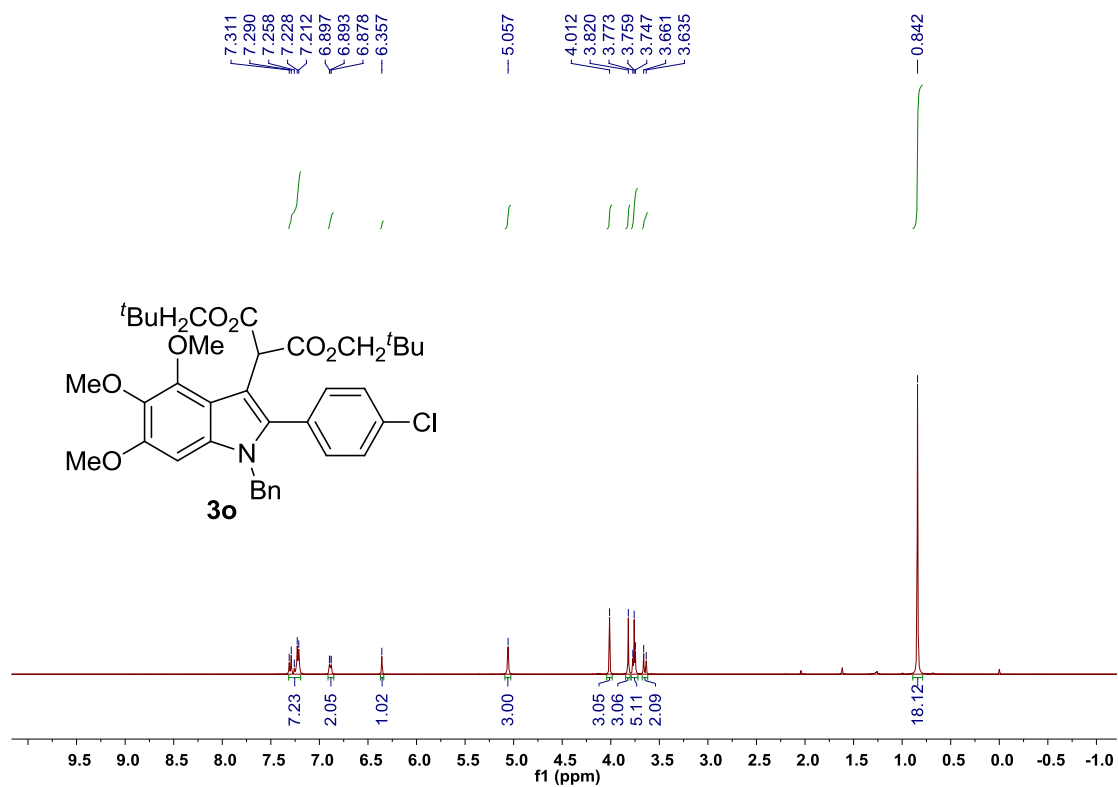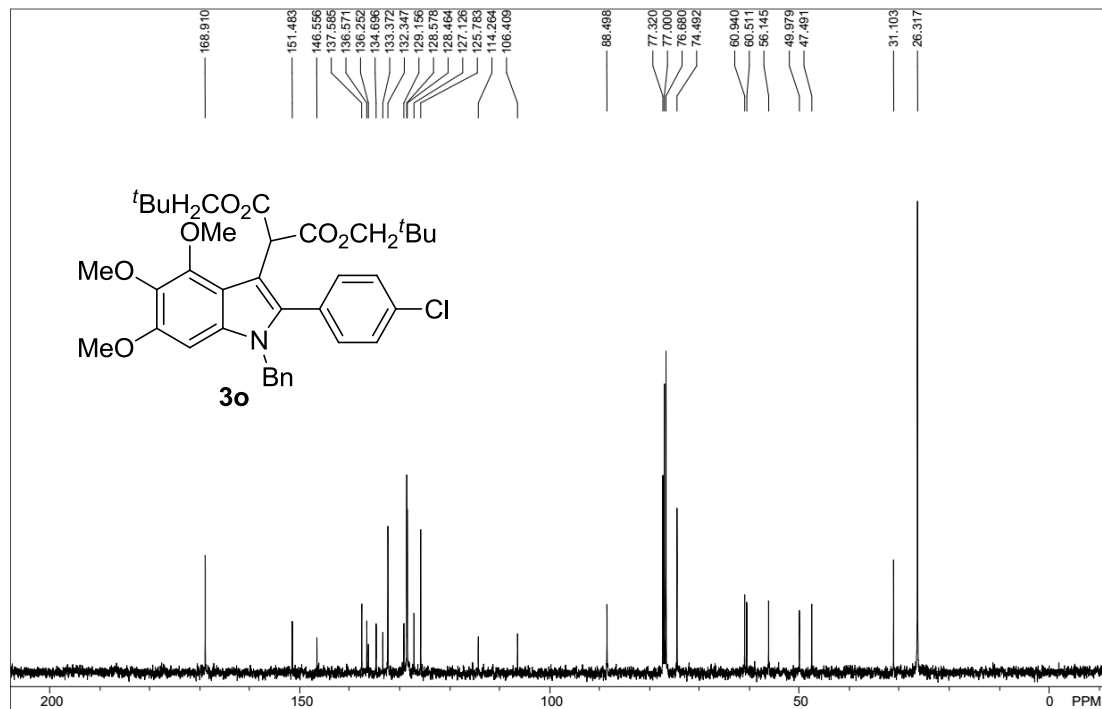

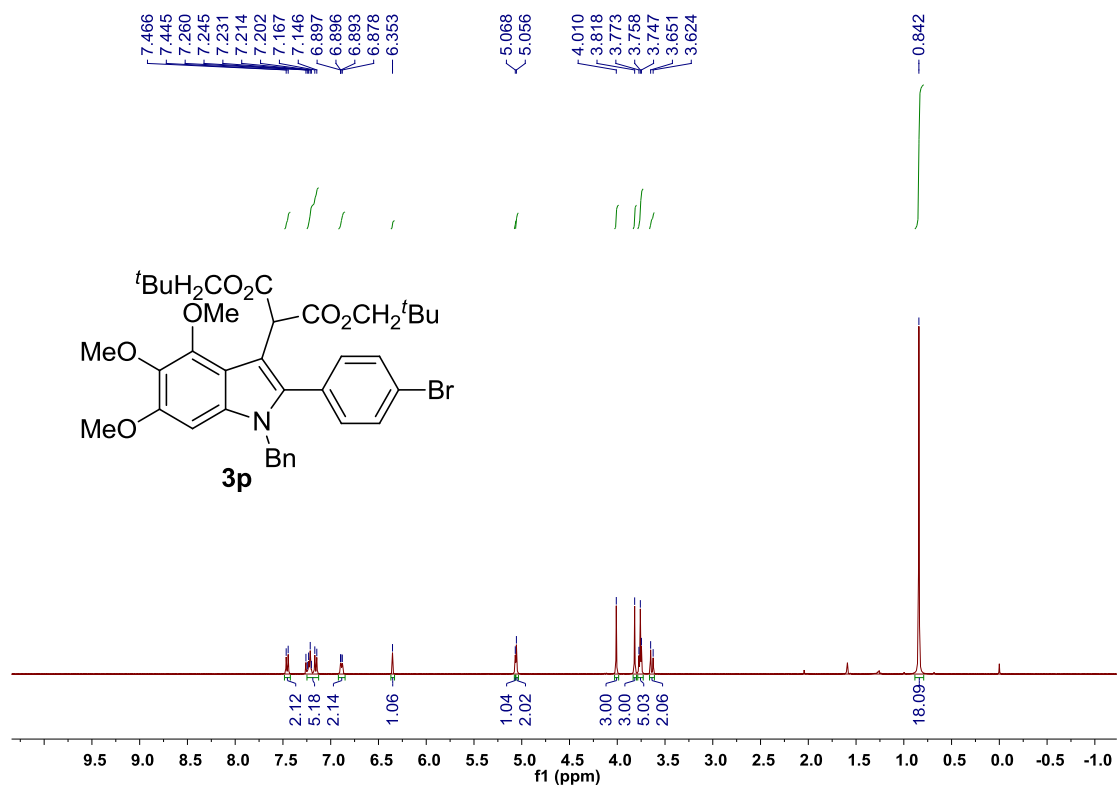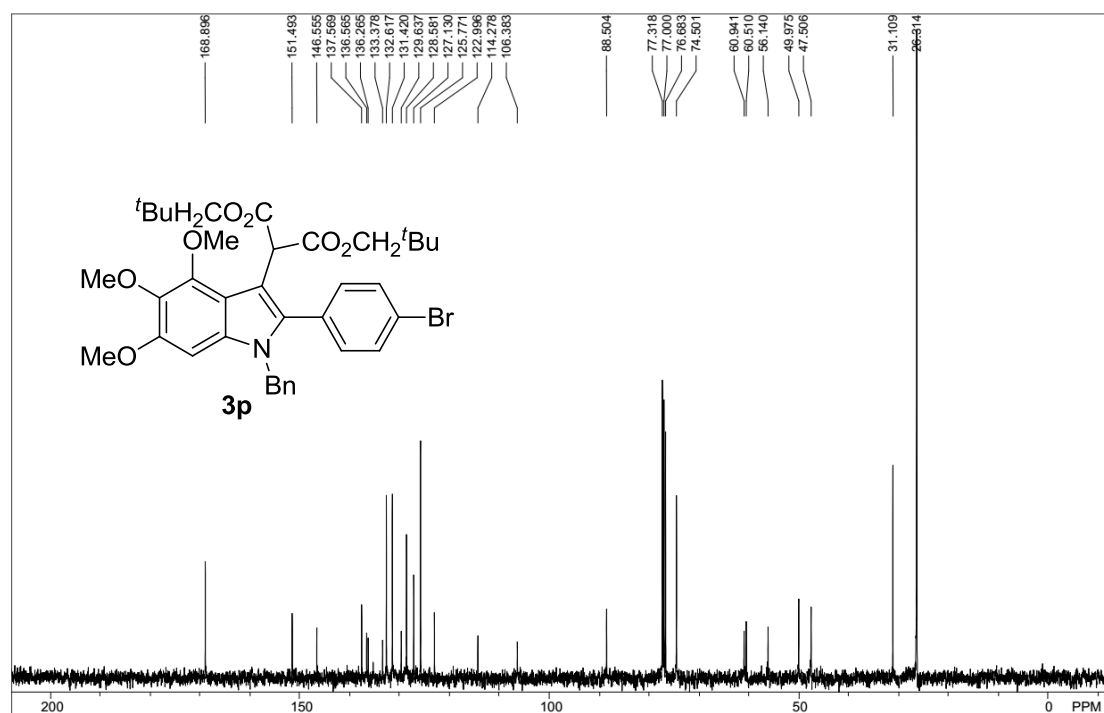

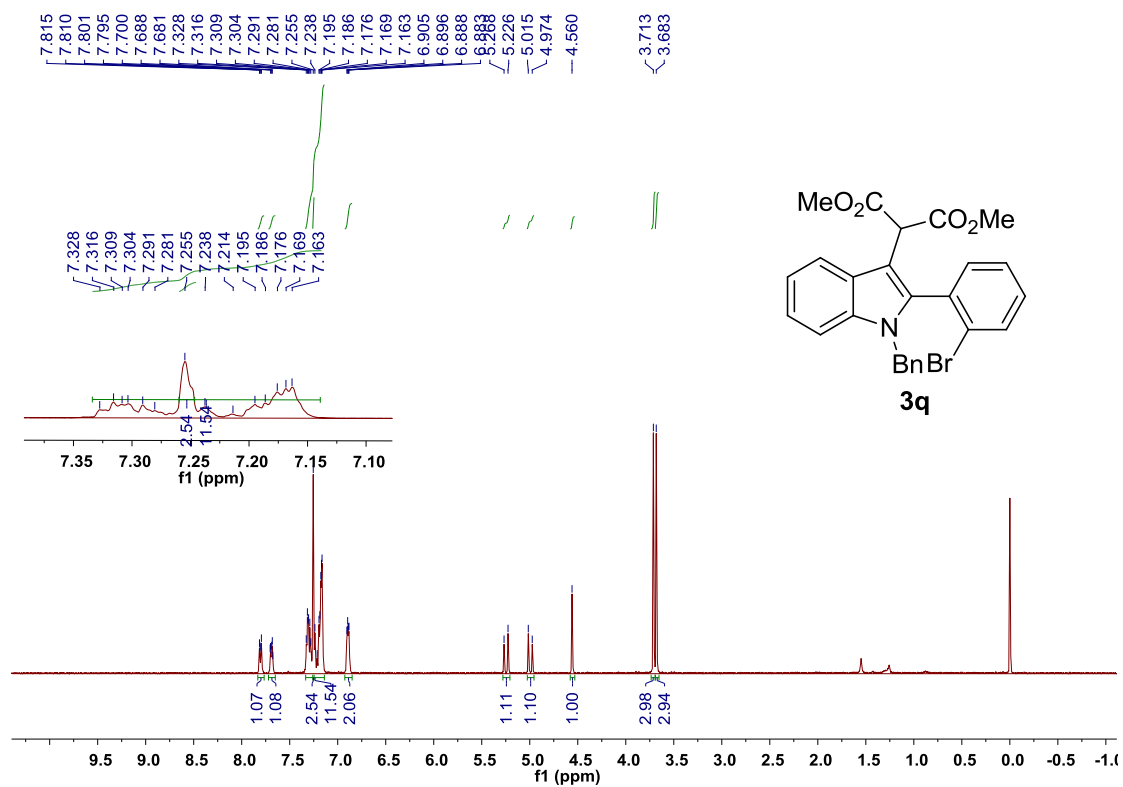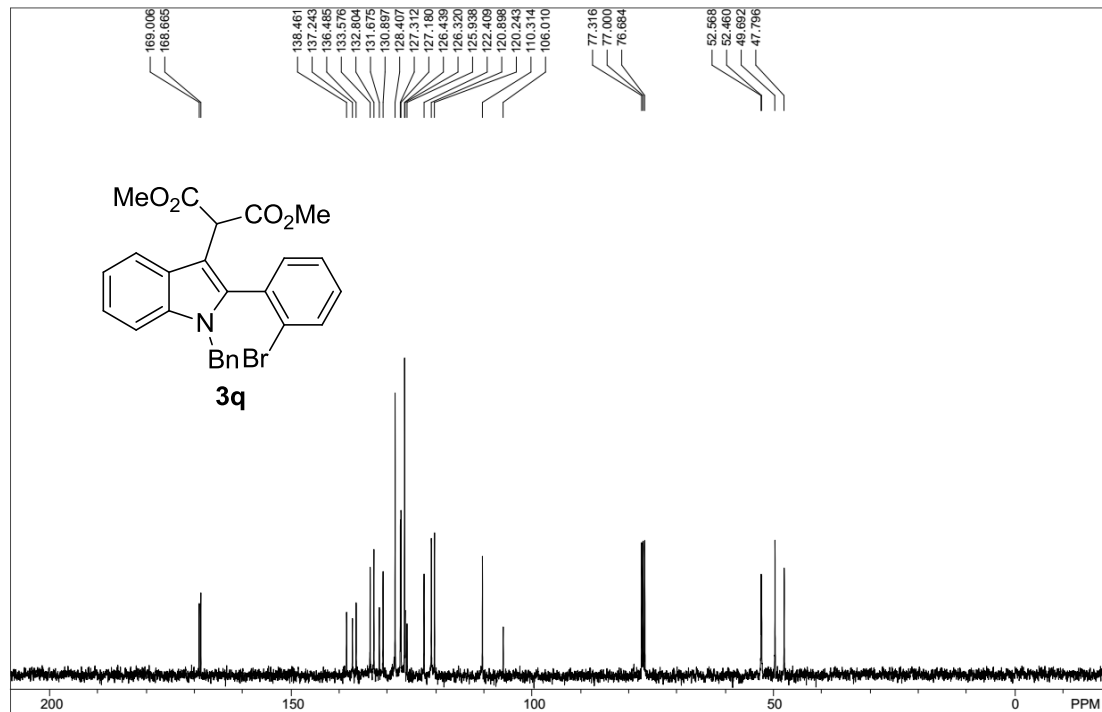

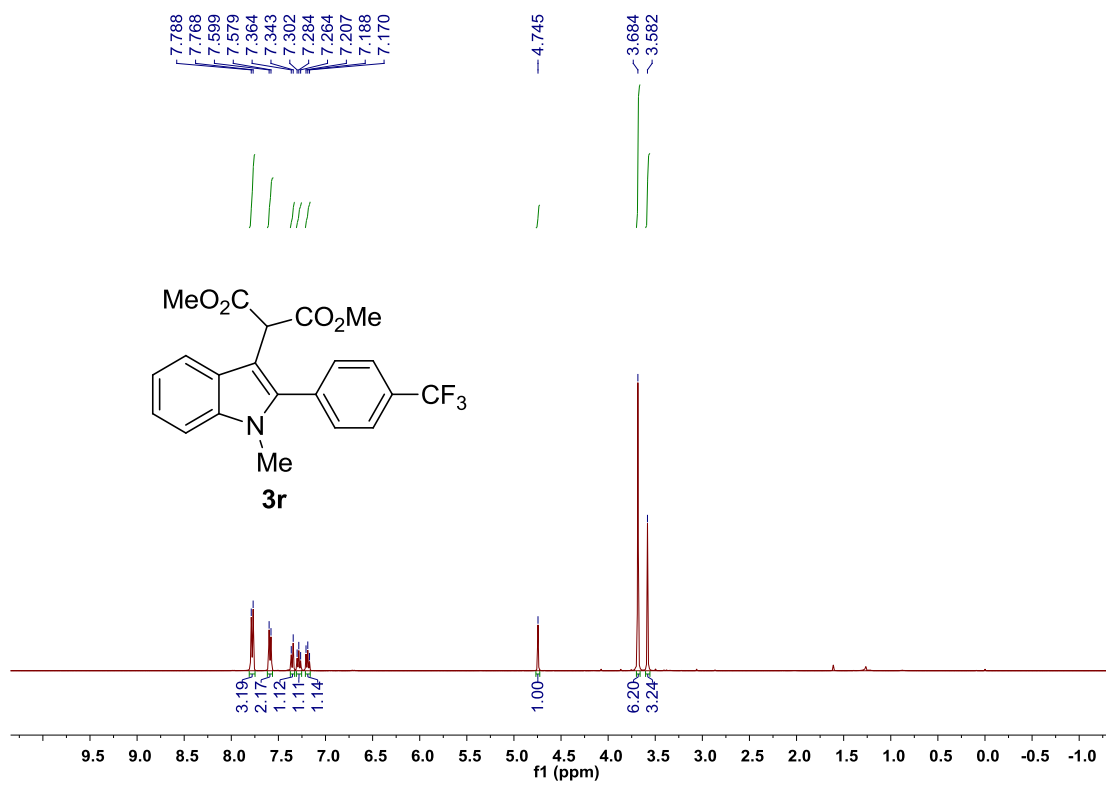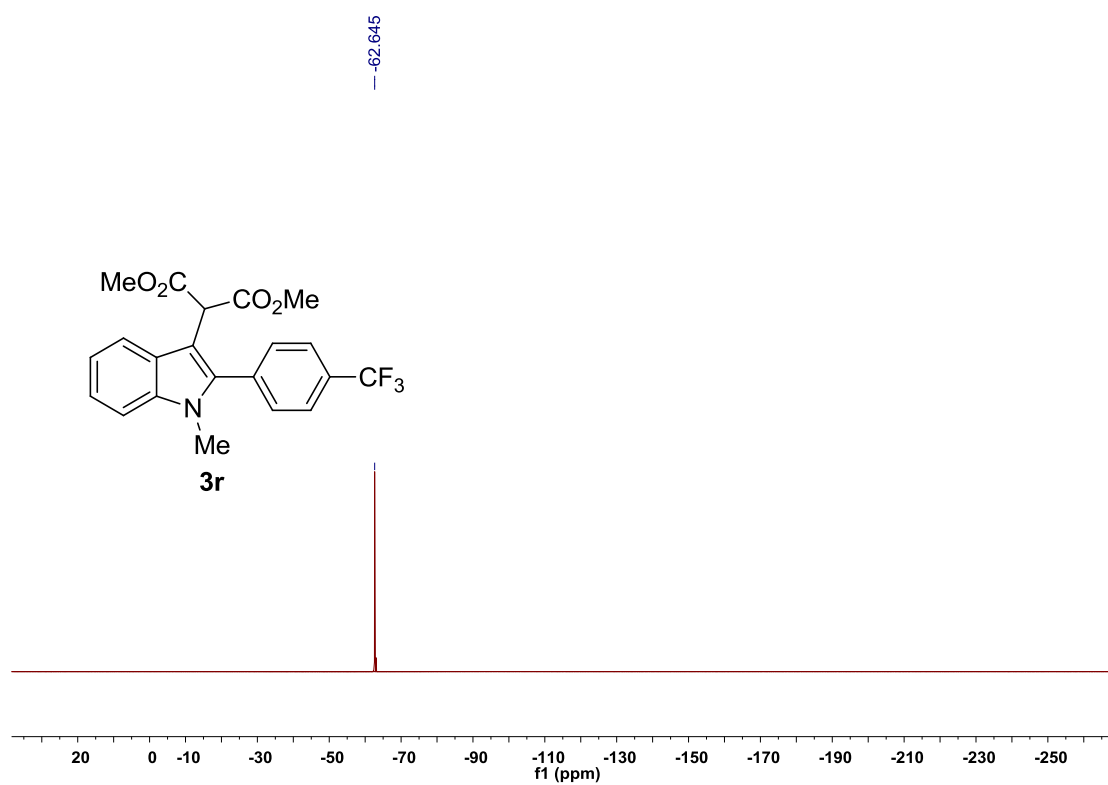

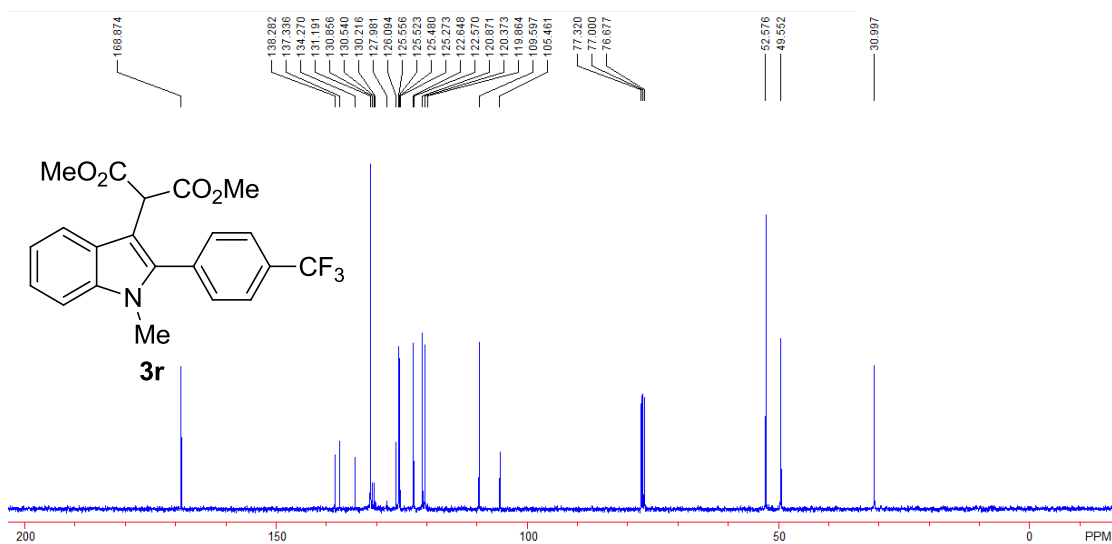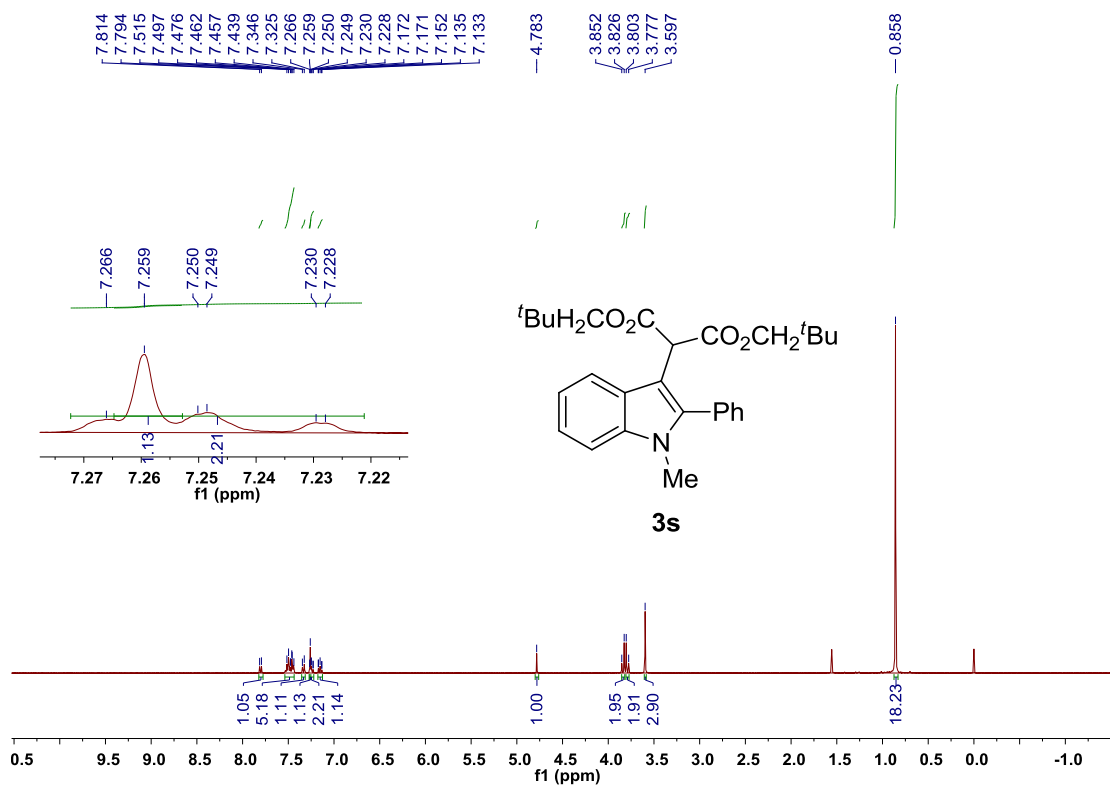

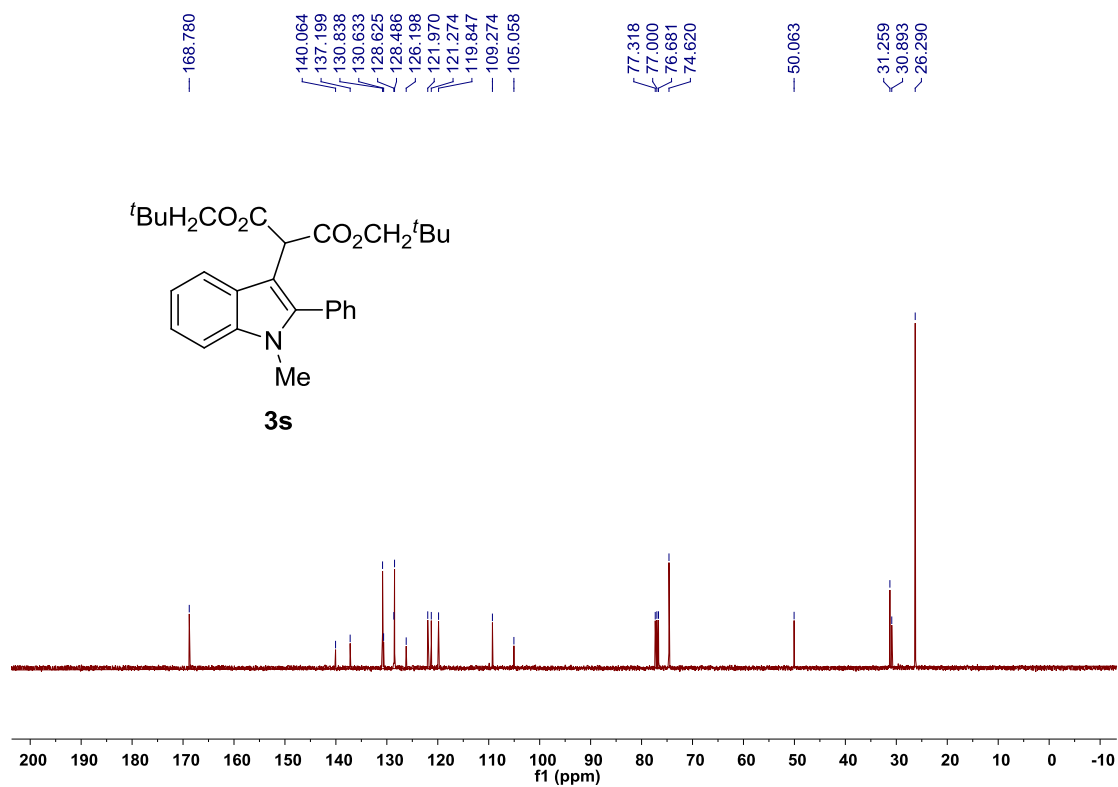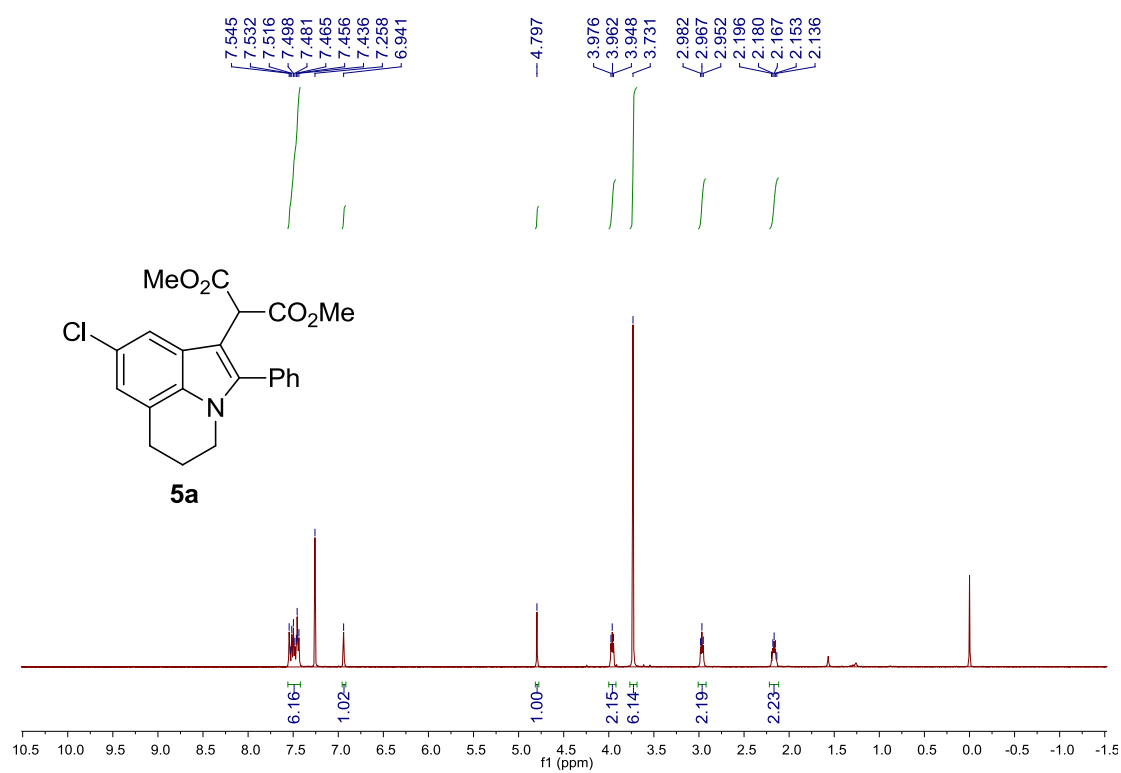

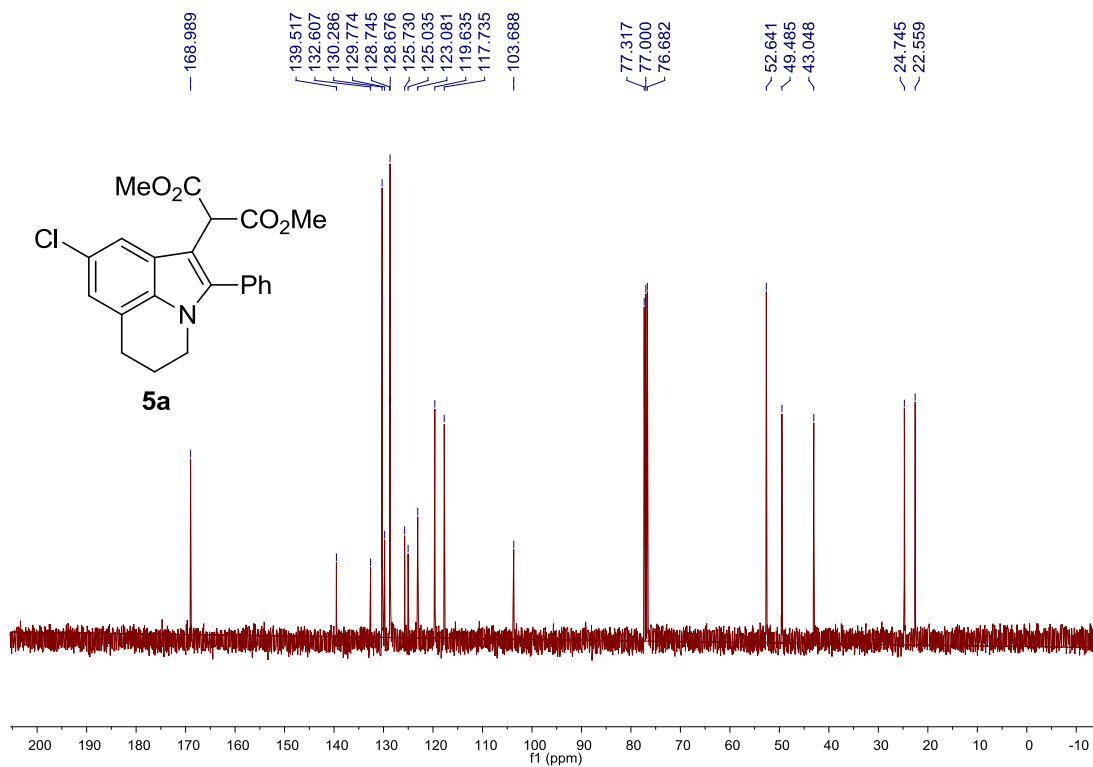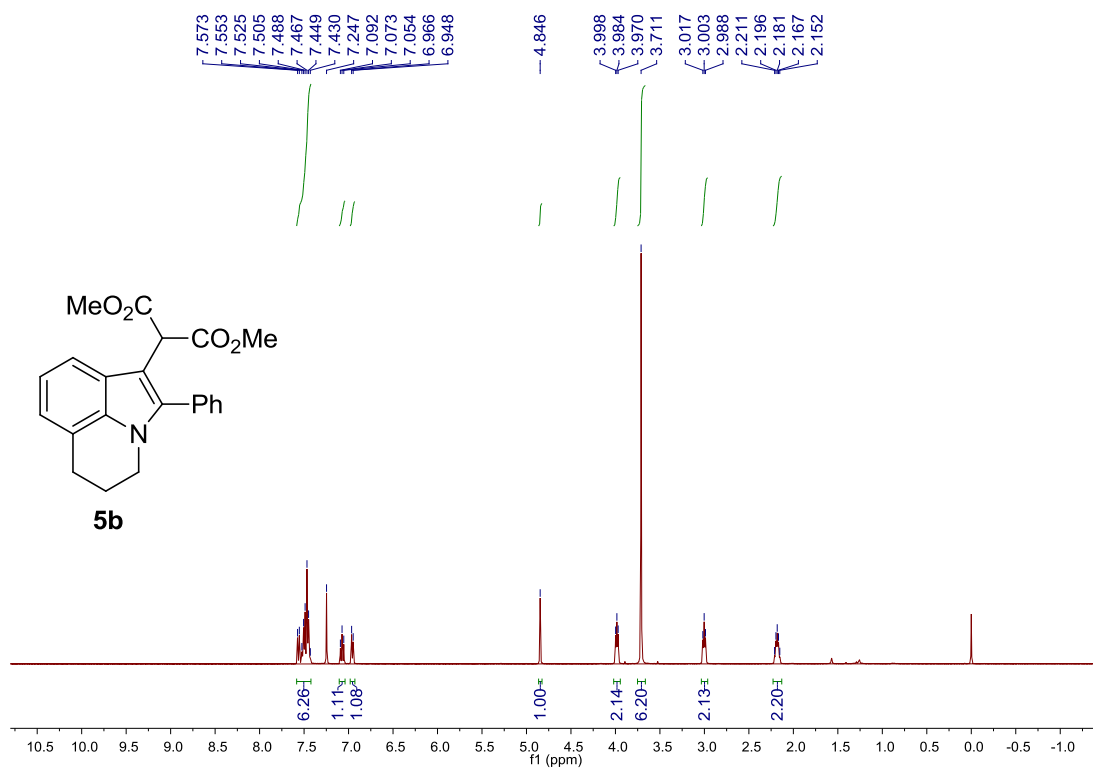

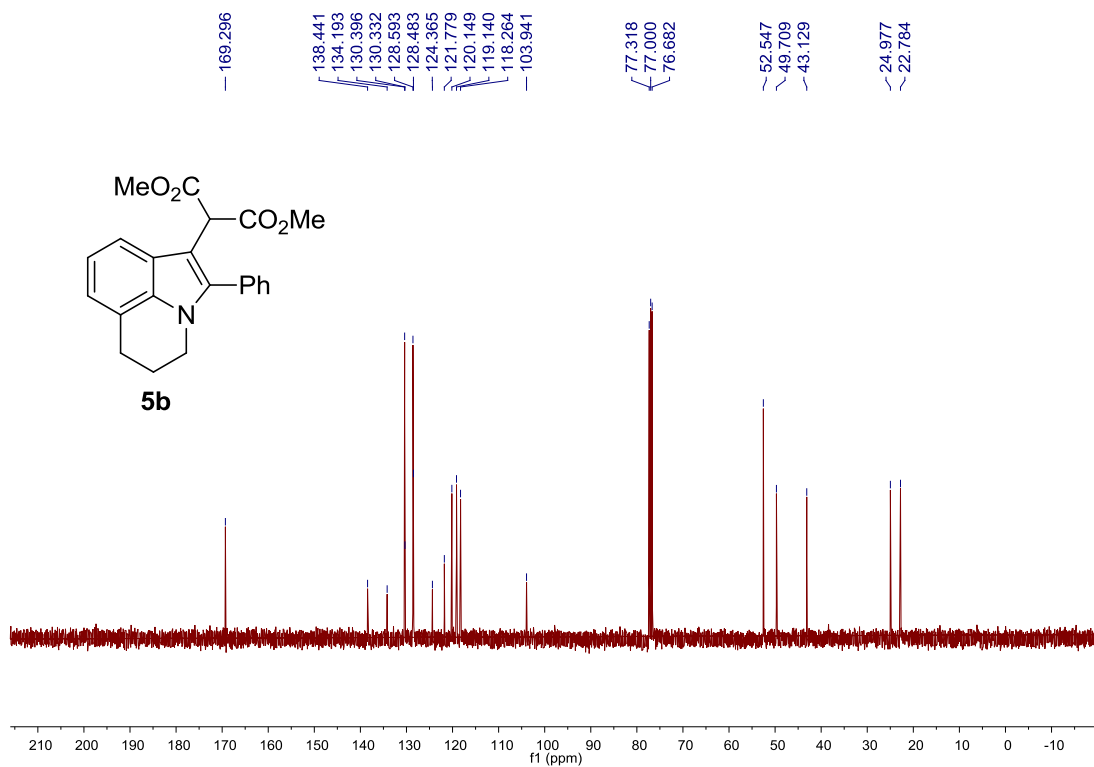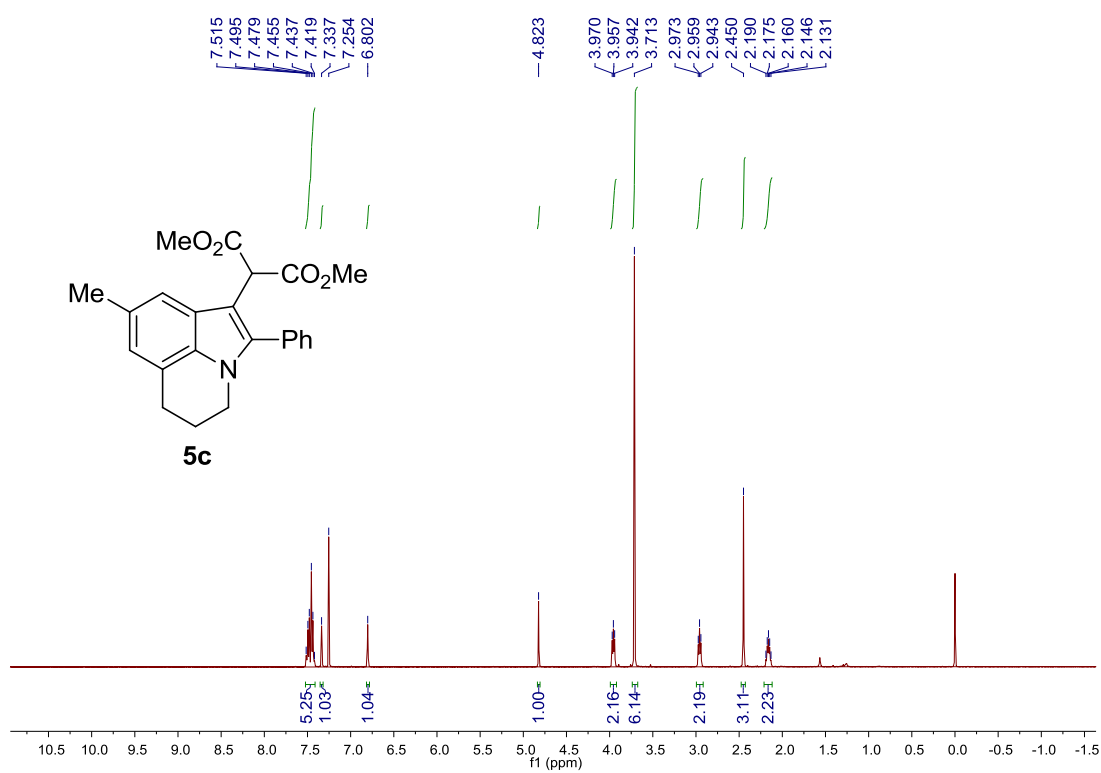



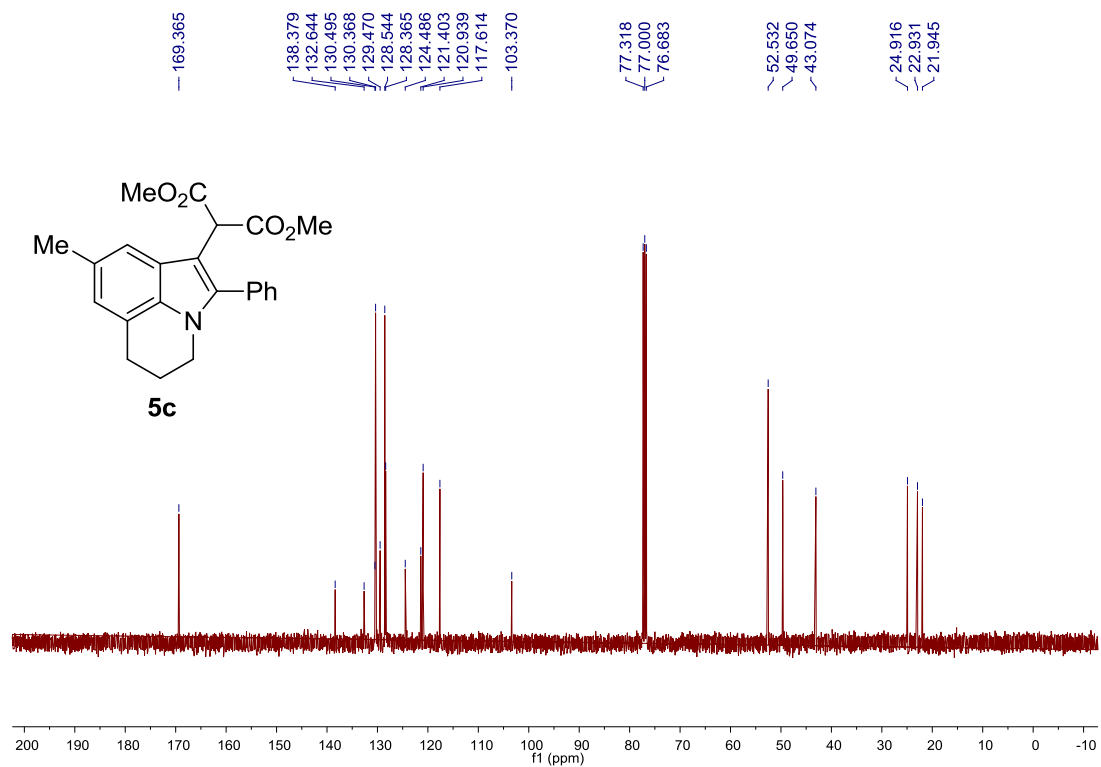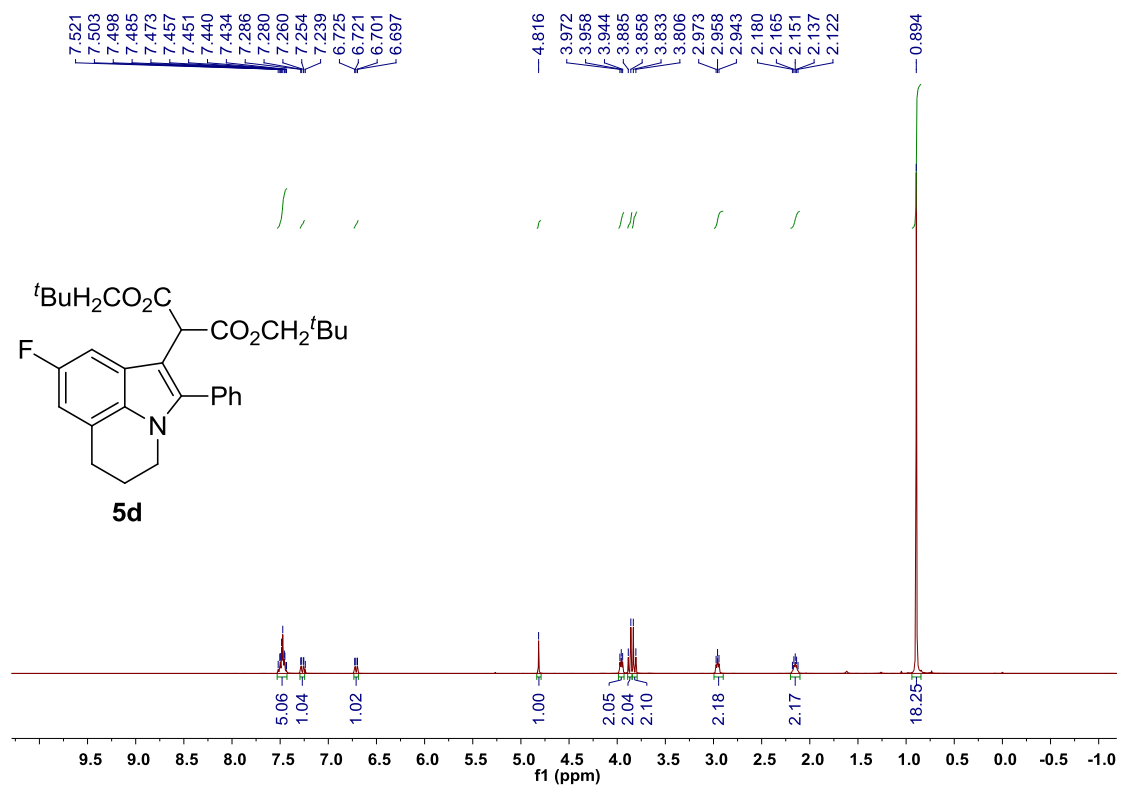

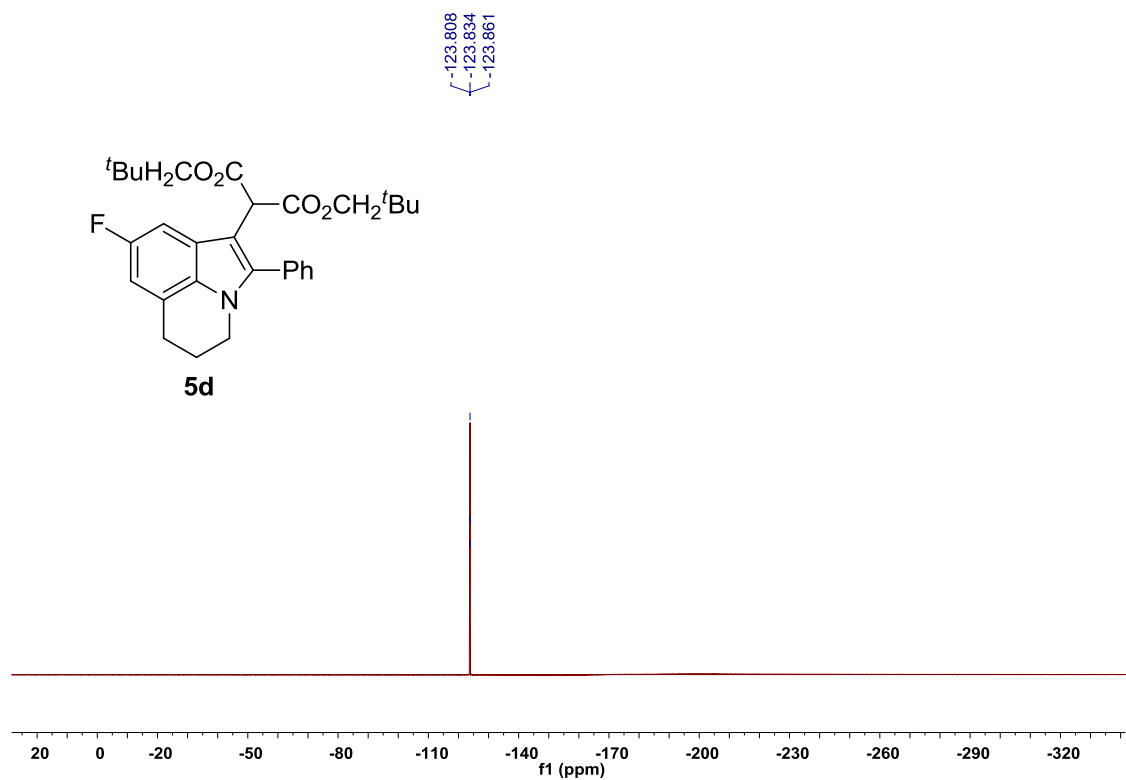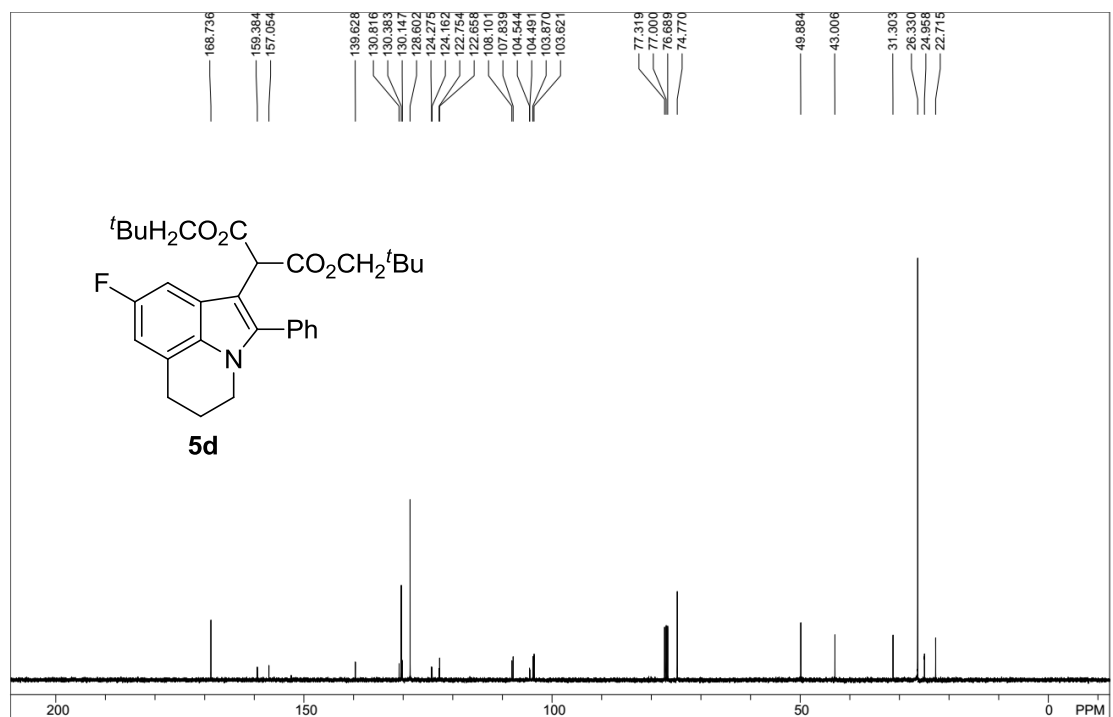

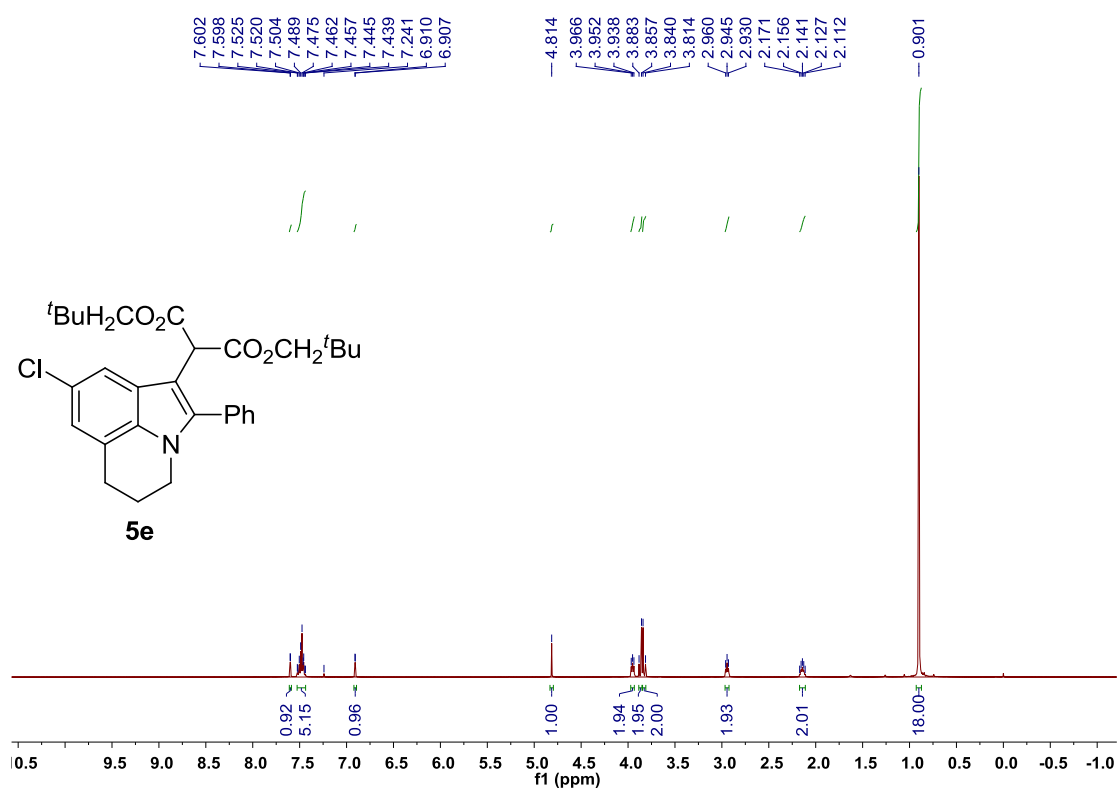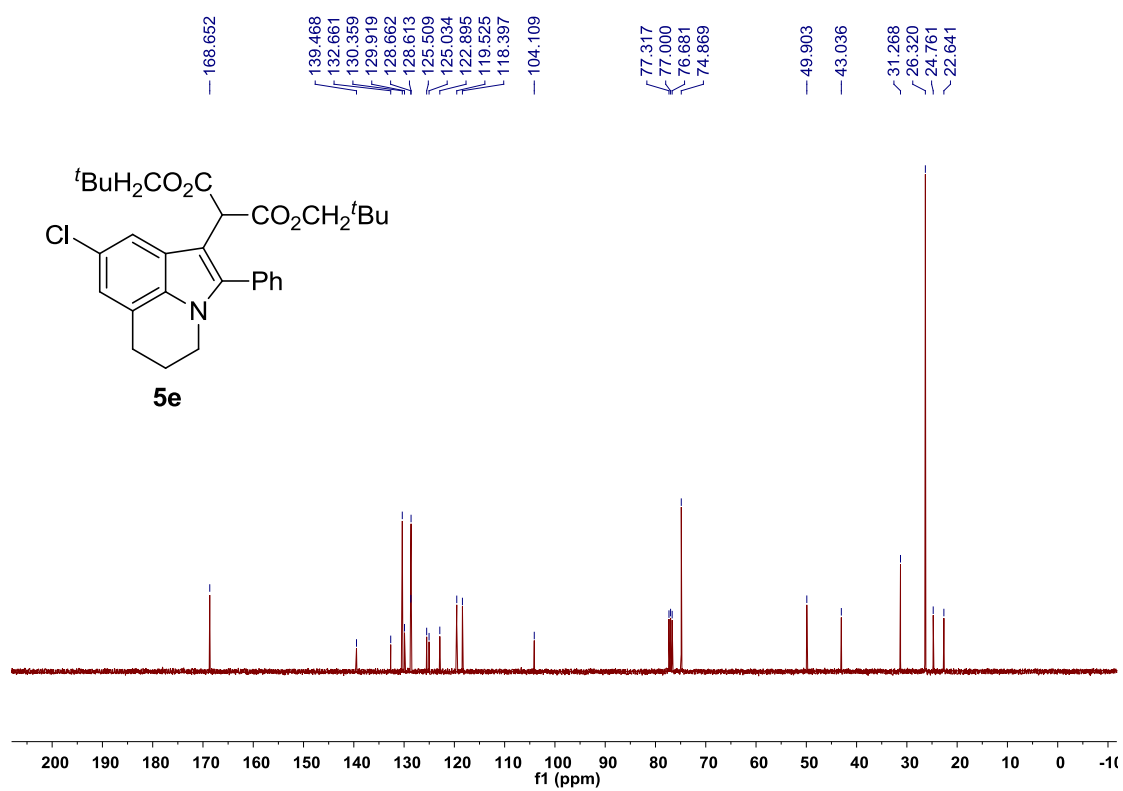

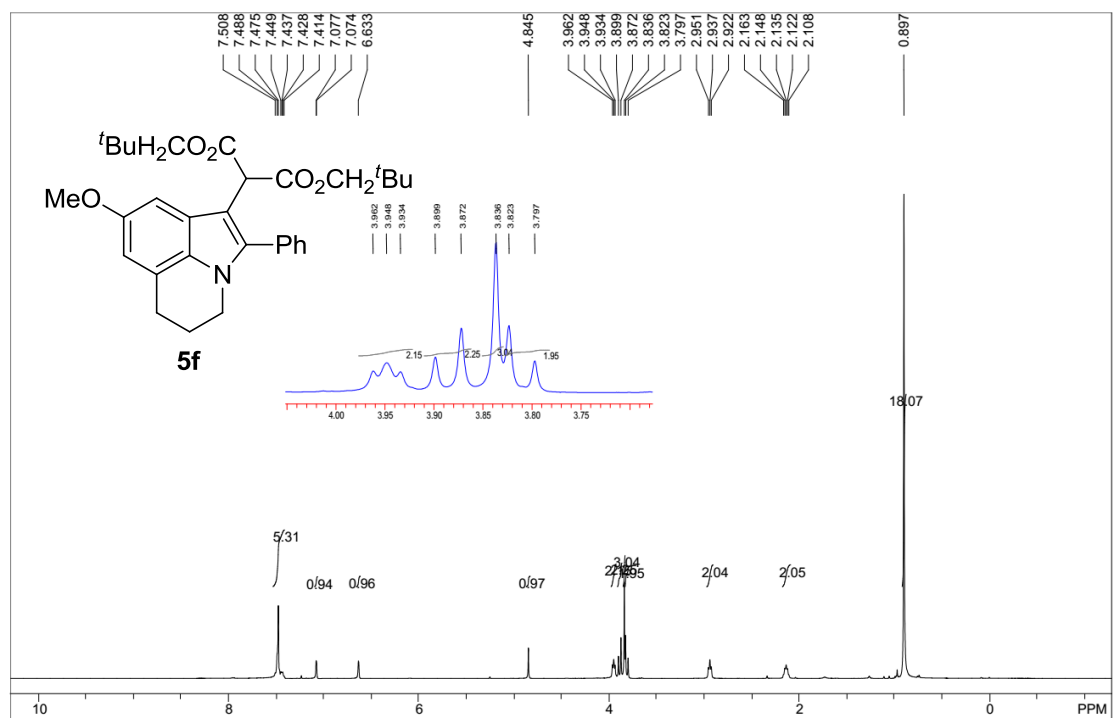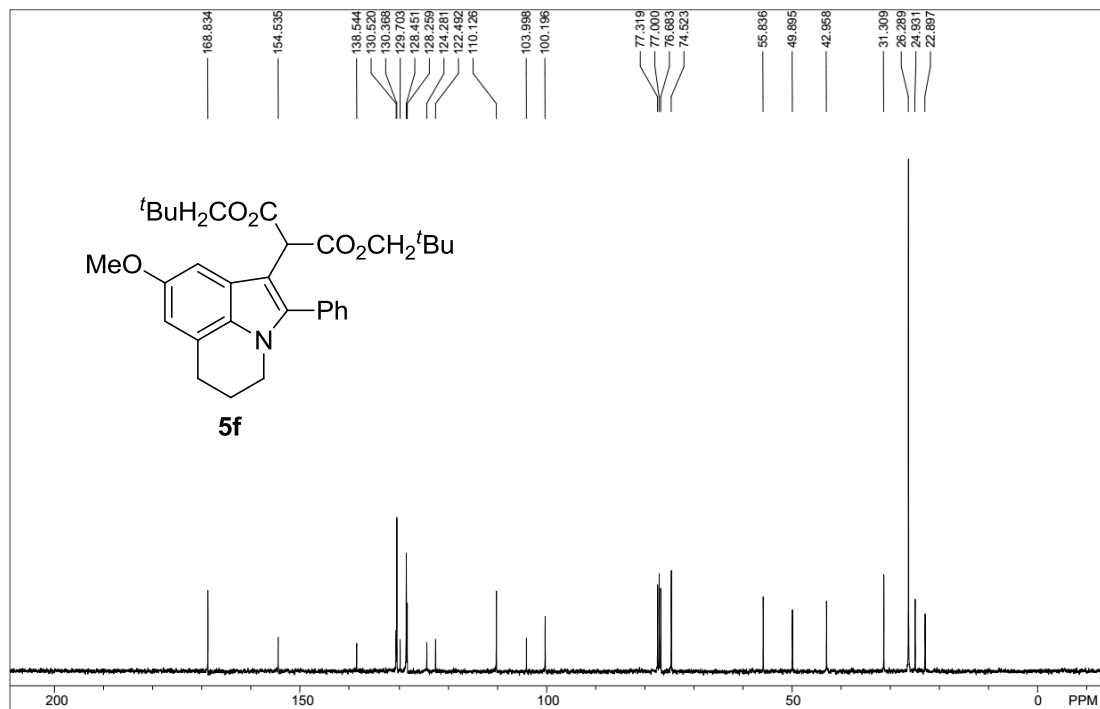

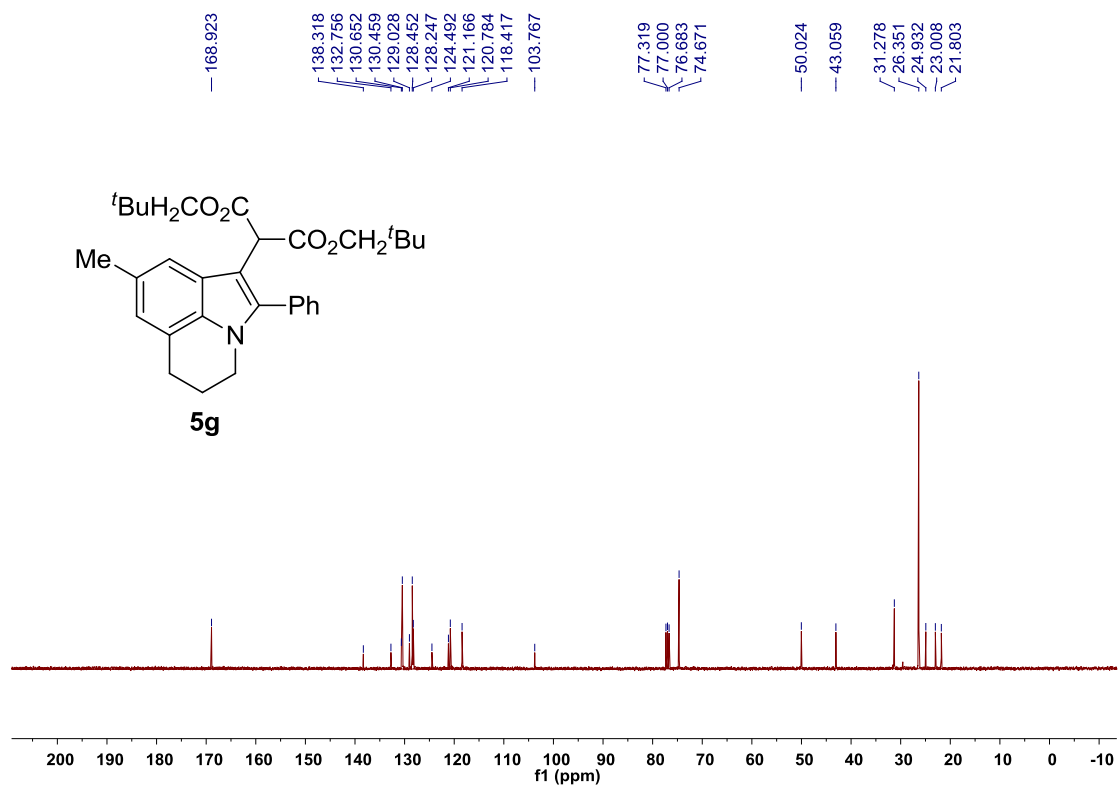

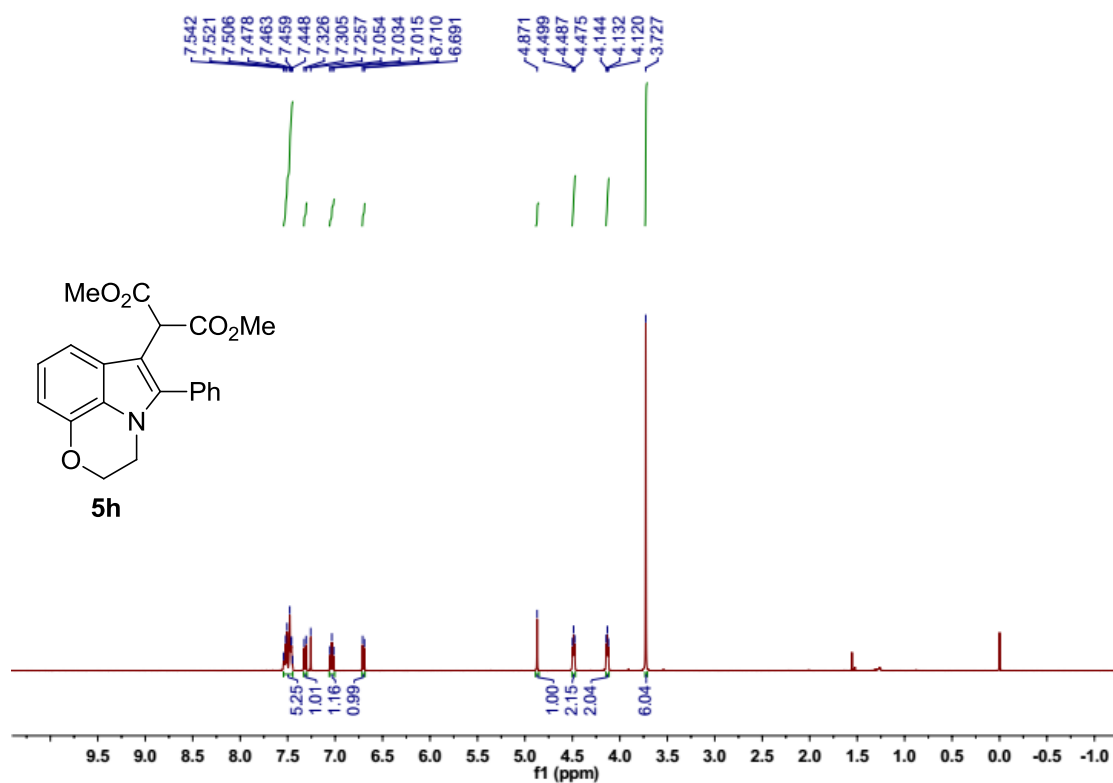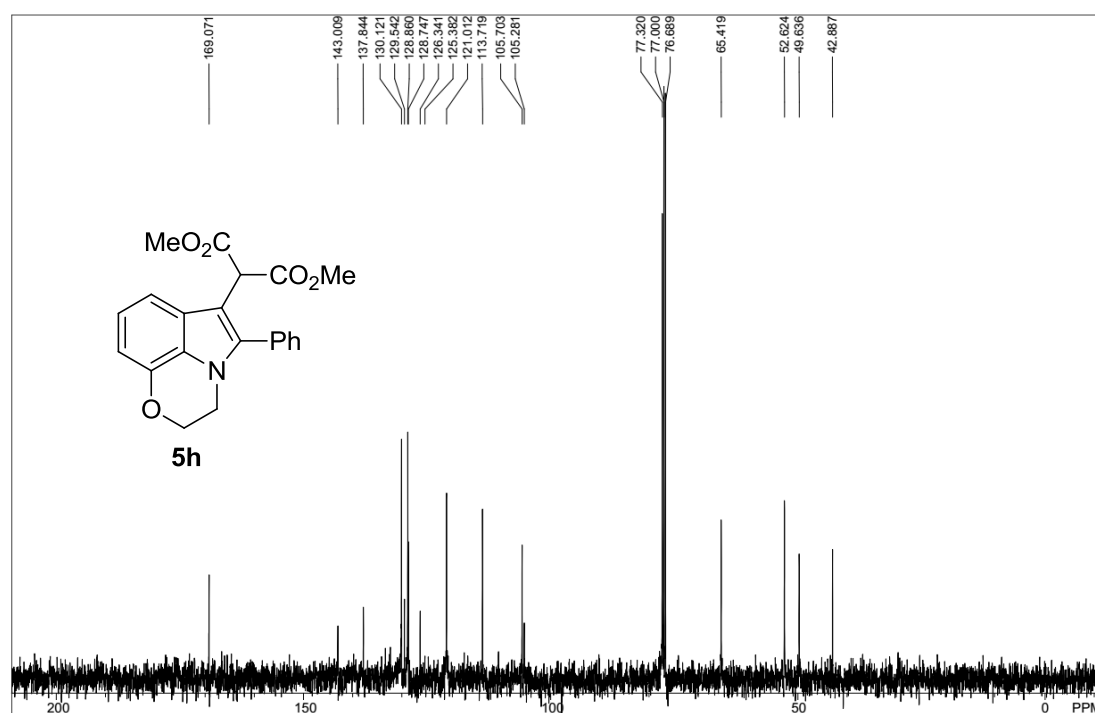

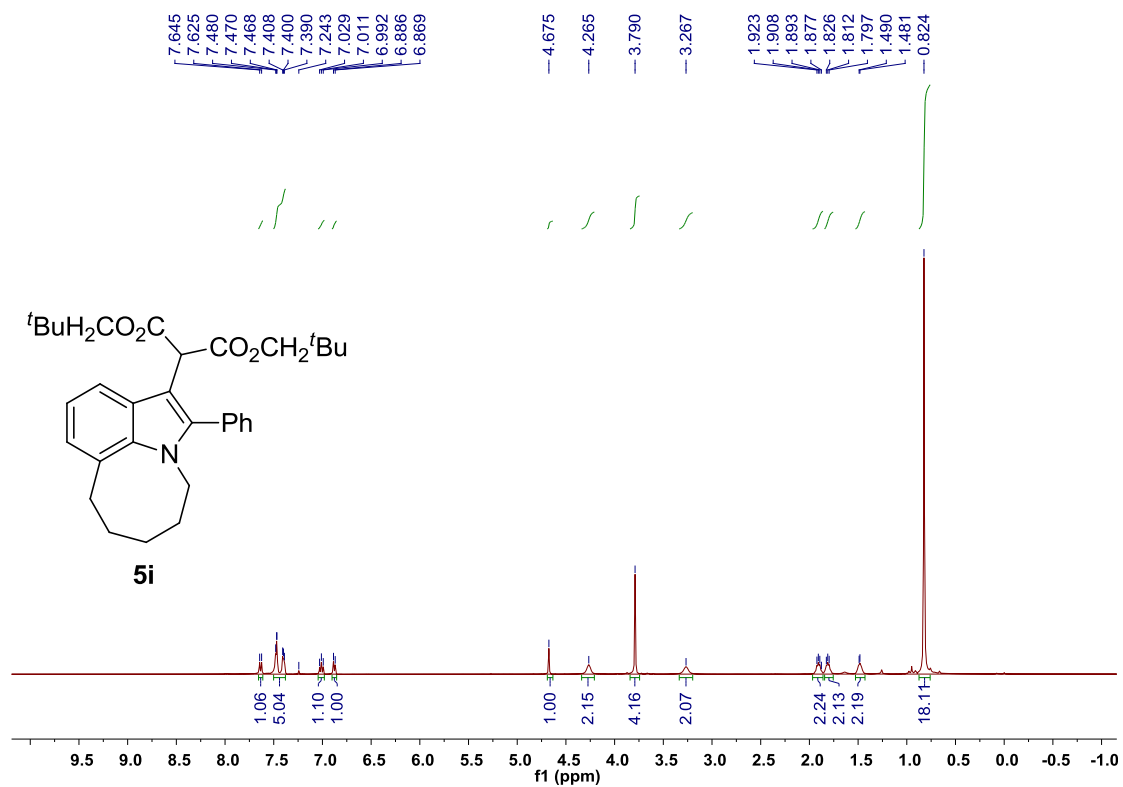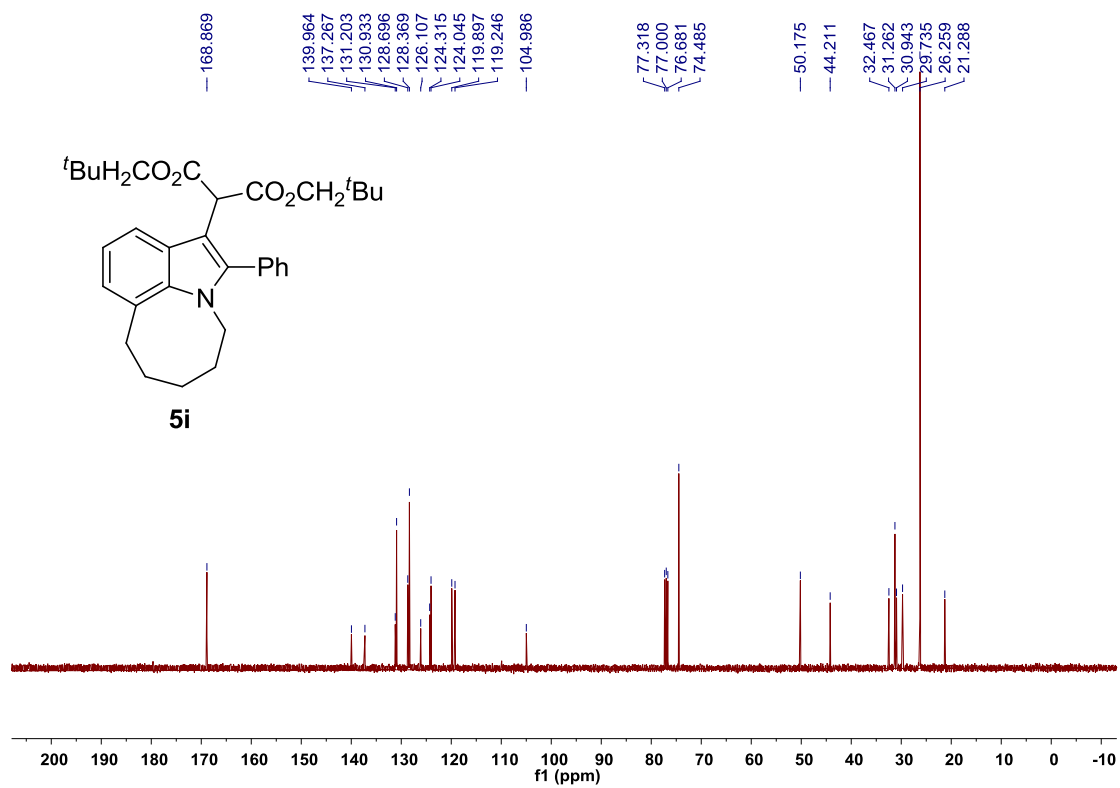

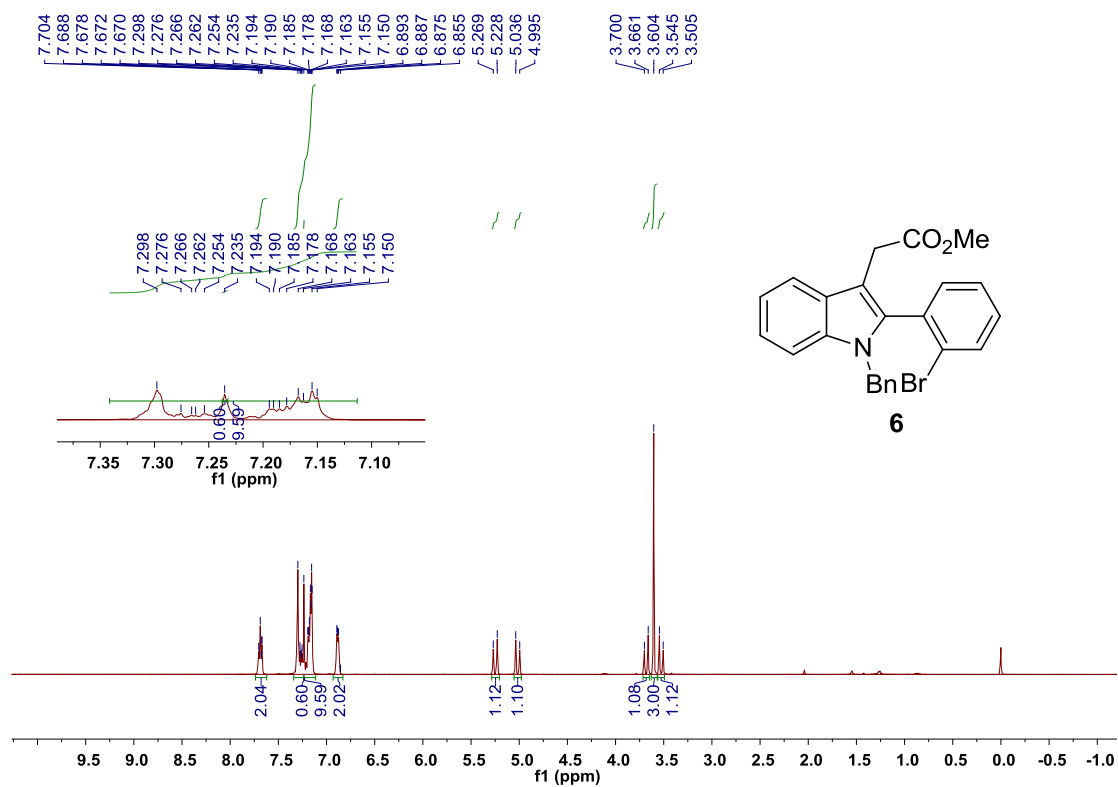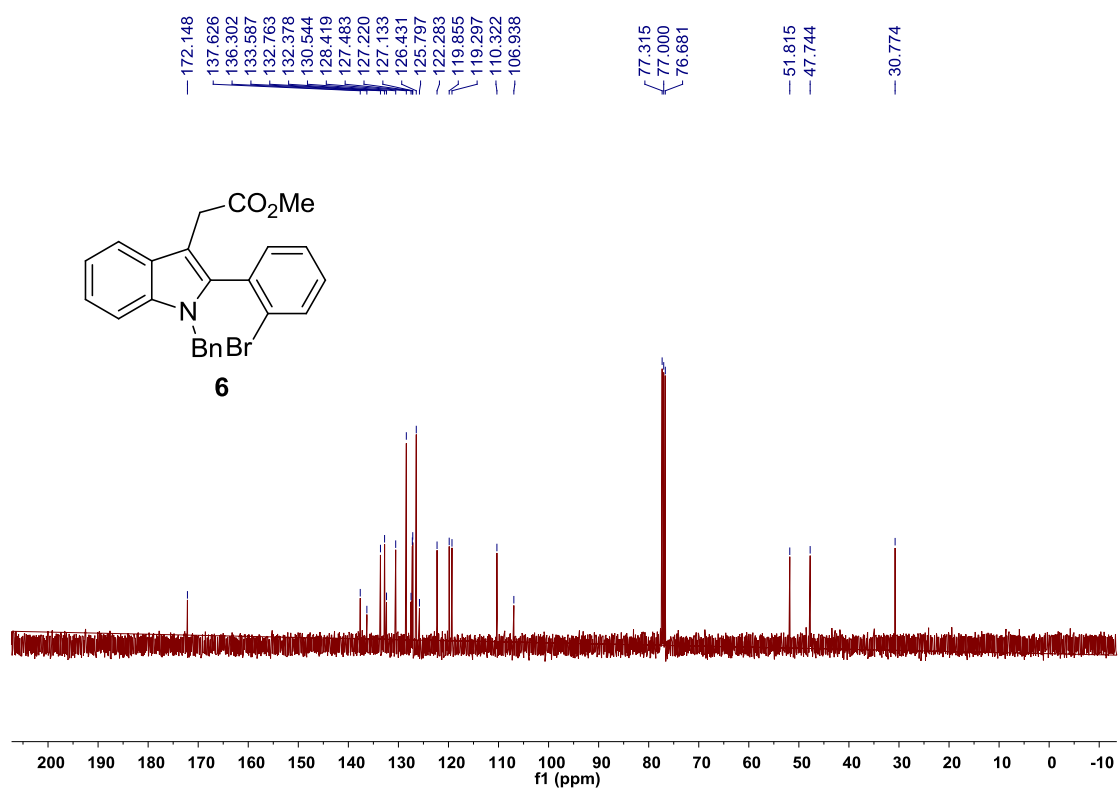



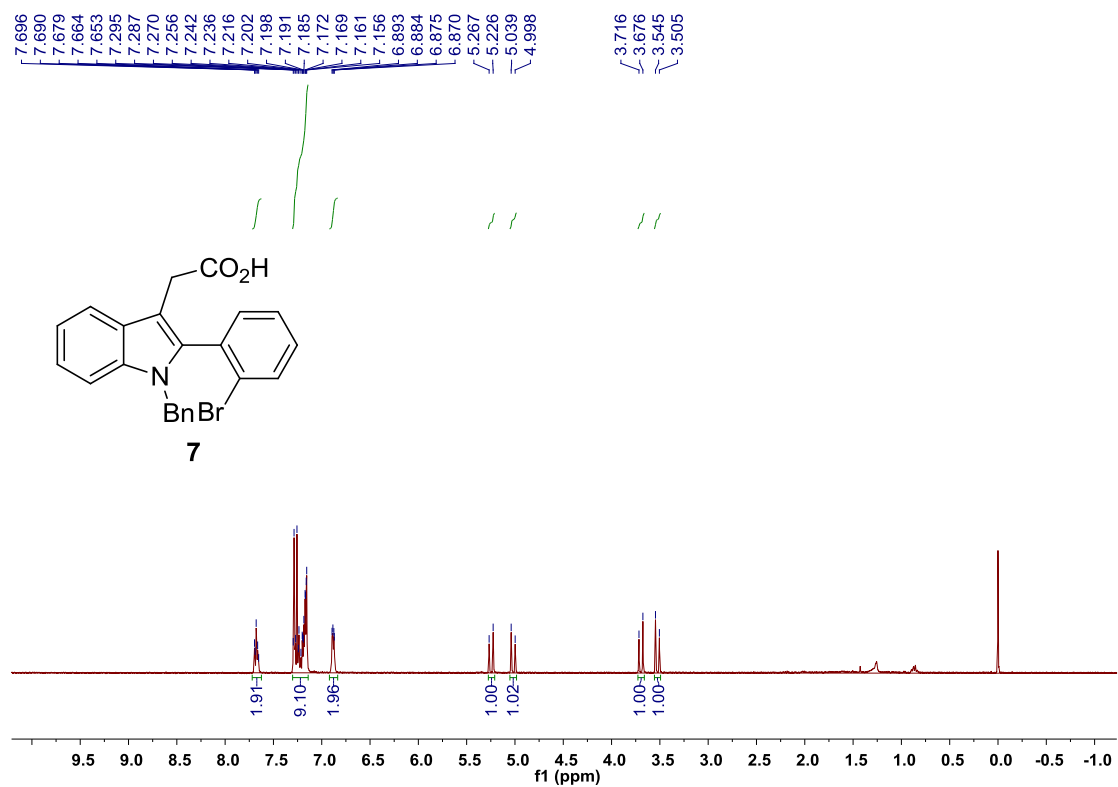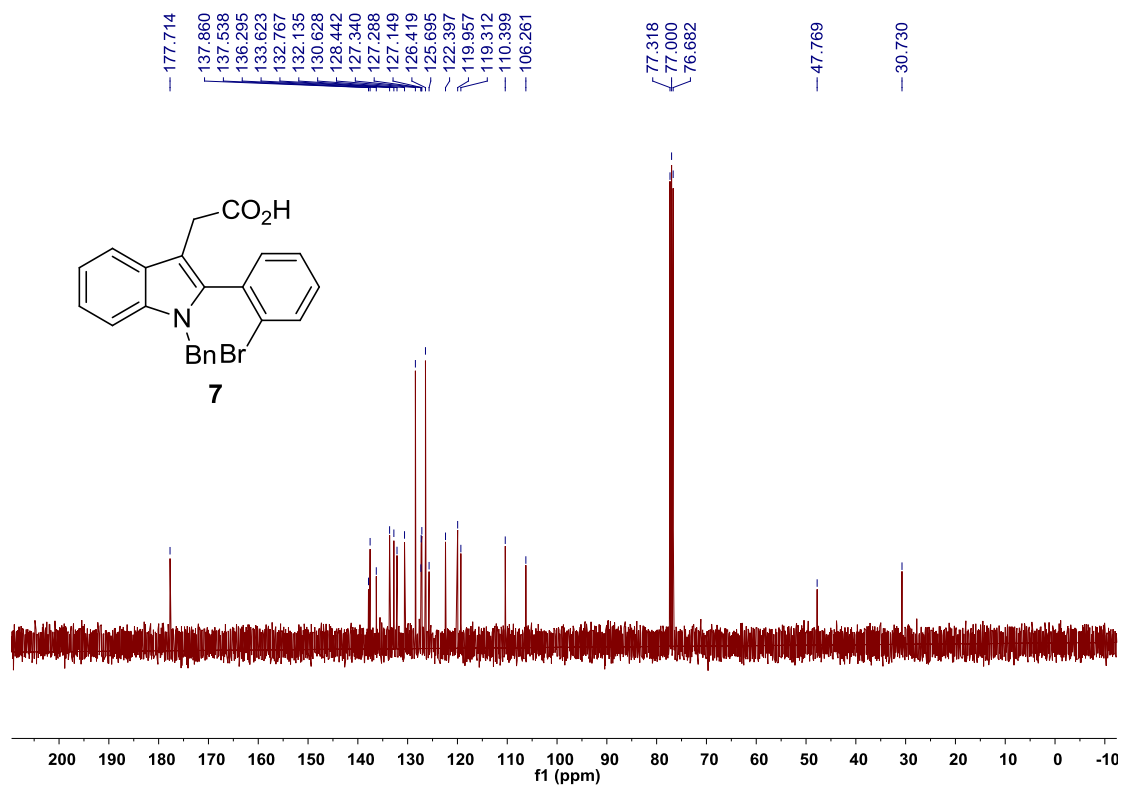

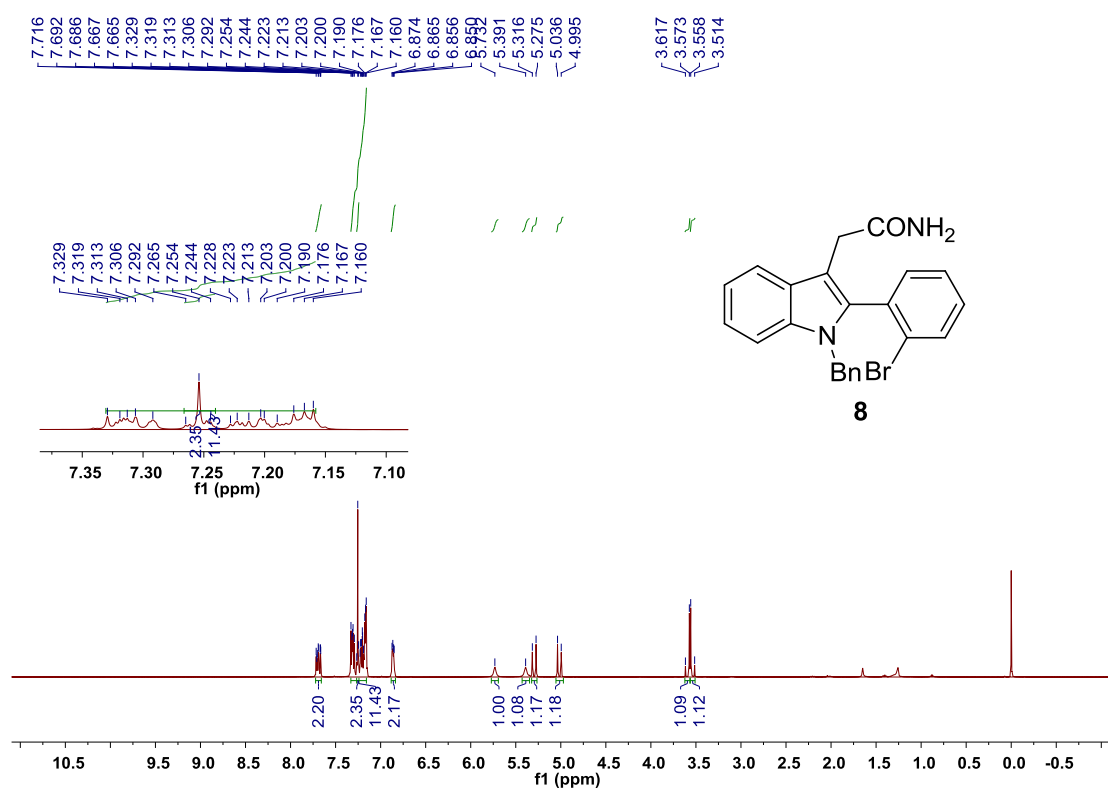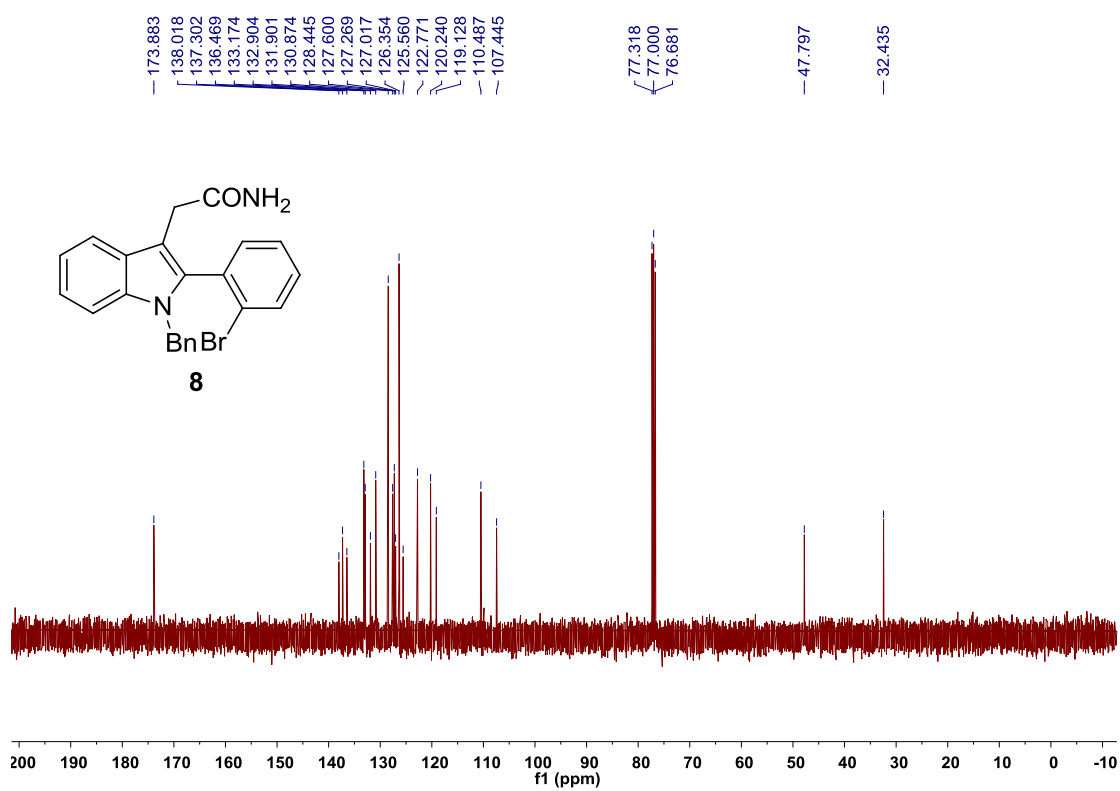

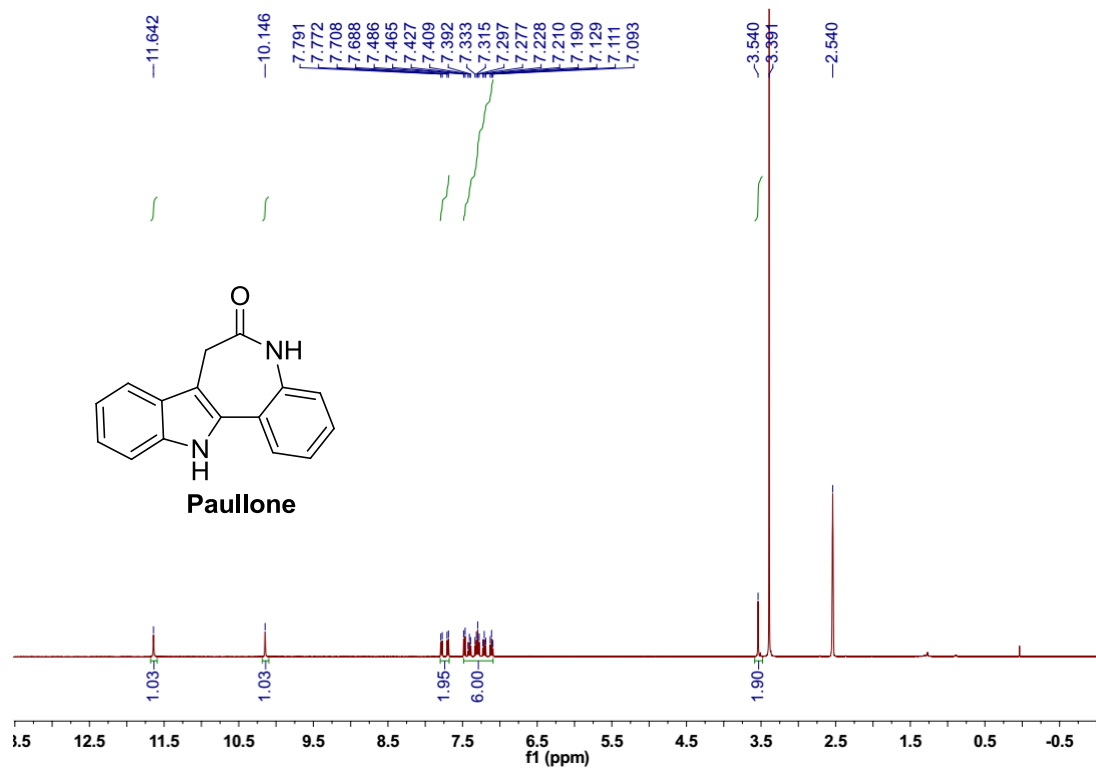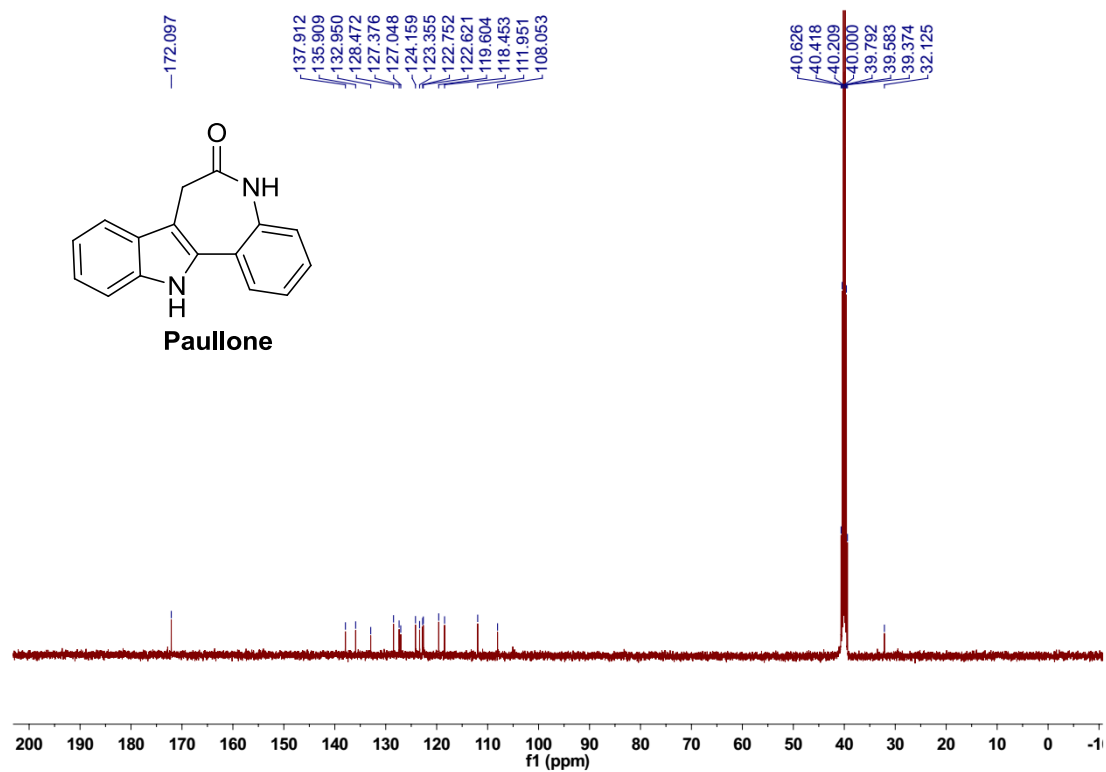

Supplement: Supplementary file 1 [file 15147692]
